# Supplementary material for: "The dead shall be raised": Multidisciplinary analysis of human skeletons reveals complexity in 19th century immigrant socioeconomic history and identity in New Haven, Connecticut
Source: PubMed Central journal article supplement (PMC6733446; doi:10.1371/journal.pone.0219279), 2019-09-09
Supplement: pone.0219279.s001.pdf [file pone.0219279.s001.pdf]

| Supplementary Table S1. Chronological data on burials (1834-1851) at Christ's Church St. John's the Evangelist Churches, Davenport Ave. & South St. New Haven, Connecticut. Individuals where trauma is recorded cause of death are in bold. Periods of infectious disease in bold box. See text for details. |       |     |      |                 |                                                 |     |             |              |                                                                            |                          |
|---------------------------------------------------------------------------------------------------------------------------------------------------------------------------------------------------------------------------------------------------------------------------------------------------------------|-------|-----|------|-----------------|-------------------------------------------------|-----|-------------|--------------|----------------------------------------------------------------------------|--------------------------|
| Rec.                                                                                                                                                                                                                                                                                                          | Month | Day | Year | Surname         | Name of Person / Non-New Haven origin           | Sex | Age (years) | Age Class    | Recorded cause of death/Notes                                              | Recorded Cause of Death  |
| 1                                                                                                                                                                                                                                                                                                             | 3     | 5   | 34   | O'Connor        | Mrs. John O'Connor (from Derby)                 | F   | -           | -            |                                                                            | Not Recorded             |
| 2                                                                                                                                                                                                                                                                                                             | 3     | 5   | 34   | McAuliff        | James McAuliff                                  | M   | -           | -            |                                                                            | Not Recorded             |
| 3                                                                                                                                                                                                                                                                                                             | 5     | 5   | 34   | Bohan           | Daughter of Bartholmew Bohan                    | F   | 3           | Preschool    |                                                                            | Not Recorded             |
| 4                                                                                                                                                                                                                                                                                                             | 5     | 5   | 34   | Bryan           | Abraham Lovel Bryan (from Oxford)               | M   | 14          | Adolescent   | Killed by falling Church Gallery (grandson)                                | Accident                 |
| 5                                                                                                                                                                                                                                                                                                             | 5     | 5   | 34   | Healy           | Ellen Healy                                     | F   | 15          | Adolescent   |                                                                            | Not Recorded             |
| 6                                                                                                                                                                                                                                                                                                             | 5     | 5   | 34   | Harger          | Abraham Hardvare [Harger] (from Derby)          | M   | -           | -            | Killed by falling Church Gallery (grandfather)                             | Accident                 |
| 7                                                                                                                                                                                                                                                                                                             | 5     | 5   | 34   | Shea            | Patrick Shea                                    | M   | -           | -            |                                                                            | Not Recorded             |
| 8                                                                                                                                                                                                                                                                                                             | 10    | 7   | 34   | McGill          | James McGill                                    | M   | 8           | Child        |                                                                            | Not Recorded             |
| 9                                                                                                                                                                                                                                                                                                             | 10    | 7   | 34   | Boden           | Mary Boden alias Bohan                          | F   | 37          | Middle Adult |                                                                            | Not Recorded             |
| 10                                                                                                                                                                                                                                                                                                            | 10    | 7   | 34   | Hayes           | Michael Hayes                                   | M   | 37          | Middle Adult |                                                                            | Not Recorded             |
| 11                                                                                                                                                                                                                                                                                                            | 10    | 7   | 34   | Green           | John Green                                      | M   | -           | -            |                                                                            | Not Recorded             |
| 12                                                                                                                                                                                                                                                                                                            | 10    | 7   | 34   | Rice            | John Rice an infant                             | M   | -           | Infant       |                                                                            | Not Recorded             |
| 13                                                                                                                                                                                                                                                                                                            | 10    | 7   | 34   | Rice            | James Rice an infant                            | M   | -           | Infant       |                                                                            | Not Recorded             |
| 14                                                                                                                                                                                                                                                                                                            | 7     | 20  | 35   | Gregory         | James Gregory                                   | M   | 10          | Child        |                                                                            | Not Recorded             |
| 15                                                                                                                                                                                                                                                                                                            | 7     | 20  | 35   | Whelan          | Mrs. Whelan                                     | F   | -           | -            |                                                                            | Not Recorded             |
| 16                                                                                                                                                                                                                                                                                                            | 7     | 20  | 35   | Driscoll        | Cornelius Driscoll                              | M   | -           | -            |                                                                            | Not Recorded             |
| 17                                                                                                                                                                                                                                                                                                            | 9     | 3   | 35   | Franklin        | James Franklin                                  | M   | 1.17        | Infant       |                                                                            | Not Recorded             |
| 18                                                                                                                                                                                                                                                                                                            | 12    | 20  | 35   | Franklin        | Ann Franklin                                    | F   | 3.5         | Preschool    |                                                                            | Not Recorded             |
| 19                                                                                                                                                                                                                                                                                                            | 12    | 20  | 35   | Slevin          | Philip Slevin                                   | M   | -           | -            |                                                                            | Not Recorded             |
| 20                                                                                                                                                                                                                                                                                                            | 1     | 9   | 36   | Fitzpatrick     | Fitzpatrick                                     | U   | 3           | Preschool    |                                                                            | Not Recorded             |
| 21                                                                                                                                                                                                                                                                                                            | 1     | 9   | 36   | McGill          | Anne McGill                                     | F   | 7           | Child        | Quinsey                                                                    | Infectious               |
| 22                                                                                                                                                                                                                                                                                                            | 1     | 9   | 36   | Unknown         | A young woman                                   | F   | 20          | Young Adult  |                                                                            | Not Recorded             |
| 23                                                                                                                                                                                                                                                                                                            | 1     | 9   | 36   | Crowley         | Crowley an infant                               | U   | -           | Infant       |                                                                            | Not Recorded             |
| 24                                                                                                                                                                                                                                                                                                            | 1     | 9   | 36   | Walsh           | Walsh an infant                                 | U   | -           | Infant       |                                                                            | Not Recorded             |
| 25                                                                                                                                                                                                                                                                                                            | 4     | 6   | 36   | Baron           | Peter G. Baron                                  | M   | 42          | Middle Adult | Febris (alt. date: October 6, 1836)                                        | Infectious               |
| 26                                                                                                                                                                                                                                                                                                            | 4     | 20  | 36   | Larkin          | Honora Larkin                                   | F   | 32          | Middle Adult | Pneumonitis (Alt date: Grave stone: Apr. 21, 1836)                         | Infectious               |
| 27                                                                                                                                                                                                                                                                                                            | 4     | 20  | 36   | Fury            | James Fury an infant                            | M   | -           | Infant       | Febris                                                                     | Infectious               |
| 28                                                                                                                                                                                                                                                                                                            | 4     | 25  | 36   | Larkin          | Catharine Larkin                                | F   | 2           | Infant       |                                                                            | Not Recorded             |
| 29                                                                                                                                                                                                                                                                                                            | 5     | 19  | 36   | Meighan         | James Meighan an infant                         | M   | -           | Infant       |                                                                            | Not Recorded             |
| 30                                                                                                                                                                                                                                                                                                            | 6     | 4   | 36   | McGinon         | Michael McGinon                                 | M   | 22          | Young Adult  | Pneumonitis                                                                | Infectious               |
| 31                                                                                                                                                                                                                                                                                                            | 6     | 6   | 36   | Higgins         | Edward Higgins                                  | M   | 32          | Middle Adult | Hydrosis                                                                   | Other                    |
| 32                                                                                                                                                                                                                                                                                                            | 6     | 11  | 36   | Murray          | John Murray                                     | M   | 2           | Infant       | Pneumonitis                                                                | Infectious               |
| 33                                                                                                                                                                                                                                                                                                            | 6     | 11  | 36   | Unknown         | a male infant                                   | M   | -           | Infant       |                                                                            | Not Recorded             |
| 34                                                                                                                                                                                                                                                                                                            | 6     | 19  | 36   | Unknown         | a male infant                                   | M   | -           | Infant       |                                                                            | Not Recorded             |
| 35                                                                                                                                                                                                                                                                                                            | 6     | 19  | 36   | Unknown         | a male infant                                   | M   | -           | Infant       |                                                                            | Not Recorded             |
| 36                                                                                                                                                                                                                                                                                                            | 7     | 23  | 36   | McGuinness      | Infant of Patrick McGuinness                    | U   | -           | Infant       |                                                                            | Not Recorded             |
| 37                                                                                                                                                                                                                                                                                                            | 8     | 2   | 36   | Clark           | Patrick Clark                                   | M   | 2           | Infant       | Pneumonitis                                                                | Infectious               |
| 38                                                                                                                                                                                                                                                                                                            | 8     | 7   | 36   | Grier           | John Grier                                      | M   | 2           | Infant       | Worms                                                                      | Infectious               |
| 39                                                                                                                                                                                                                                                                                                            | 8     | 15  | 36   | Fitzpatrick     | Bridget Fitzpatrick infant                      | F   | -           | Infant       |                                                                            | Not Recorded             |
| 40                                                                                                                                                                                                                                                                                                            | 9     | 14  | 36   | Dermody         | James Dermody infant                            | M   | -           | Infant       | Enteritis                                                                  | Gastrointestinal         |
| 41                                                                                                                                                                                                                                                                                                            | 10    | 20  | 36   | Curley          | Thomas Curley                                   | M   | 50          | Mature Adult | Sudden, found dead                                                         | Other                    |
| 42                                                                                                                                                                                                                                                                                                            | 11    | 9   | 36   | Duffy           | Duffy a male child                              | M   | -           | -            |                                                                            | Not Recorded             |
| 43                                                                                                                                                                                                                                                                                                            | 11    | 24  | 36   | Kelley          | Thomas Kelley                                   | M   | 38          | Middle Adult | Bowel complaint                                                            | Gastrointestinal         |
| 44                                                                                                                                                                                                                                                                                                            | 12    | 25  | 36   | Carroll         | Philip Carroll                                  | M   | 40          | Middle Adult | Accident falling                                                           | Accident                 |
| 45                                                                                                                                                                                                                                                                                                            | 1     | 15  | 37   | Cody            | Dennis Cody                                     | M   | 2           | Infant       | Phthisis                                                                   | Infectious               |
| 46                                                                                                                                                                                                                                                                                                            | 2     | 1   | 37   | Calhill         | Dennis Calhill                                  | M   | 22          | Young Adult  |                                                                            | Not Recorded             |
| 47                                                                                                                                                                                                                                                                                                            | 2     | 6   | 37   | Reynolds        | Owen Reynolds                                   | M   | 34          | Middle Adult |                                                                            | Infectious               |
| 48                                                                                                                                                                                                                                                                                                            | 2     | 13  | 37   | Costillow       | Infant of Costillow                             | U   | -           | Infant       | Cold Catarrh                                                               | Not Recorded             |
| 49                                                                                                                                                                                                                                                                                                            | 2     | 20  | 37   | Cogan           | Cogan                                           | U   | 3           | Preschool    | Scarlatina                                                                 | Infectious               |
| 50                                                                                                                                                                                                                                                                                                            | 2     | 26  | 37   | McNulty         | Ann McNulty                                     | F   | 30          | Young Adult  | Diarrhoea                                                                  | Gastrointestinal         |
| 51                                                                                                                                                                                                                                                                                                            | 2     | 27  | 37   | Flynn           | Patrick Flynn                                   | M   | 56          | Mature Adult | Kick of horse                                                              | Accident                 |
| 52                                                                                                                                                                                                                                                                                                            | 4     | 18  | 37   | Harmitte        | James Harmitte                                  | M   | 21          | Young Adult  |                                                                            | Not Recorded             |
| 53                                                                                                                                                                                                                                                                                                            | 6     | 19  | 37   | Brady           | James Brady (son of) Nicholas & Margaret        | M   | 2           | Infant       | Church record (no city record) (see record 236)                            | Not Recorded             |
| 54                                                                                                                                                                                                                                                                                                            | 7     | 24  | 37   | Downing         | Gerald Downing (from Middletown)                | M   | -           | -            |                                                                            | Not Recorded             |
| 55                                                                                                                                                                                                                                                                                                            | 8     | 14  | 37   | Shiel           | Catherine Shiel                                 | F   | 37          | Middle Adult | Puerperal                                                                  | Childbirth               |
| 56                                                                                                                                                                                                                                                                                                            | 9     | 24  | 37   | Fare            | William Fare or Hare (Henry Hare)               | M   | 27          | Young Adult  | Phthisis (Tuberculosis) (stone: Sept 22, 1837)                             | Infectious               |
| 57                                                                                                                                                                                                                                                                                                            | 10    | 8   | 37   | Carmody         | Patrick Carmody                                 | M   | 37          | Middle Adult | Cold Catarrh                                                               | Infectious               |
| 58                                                                                                                                                                                                                                                                                                            | 11    | 15  | 37   | Sullivan        | Ann Sullivan                                    | F   | 23          | Young Adult  | Phthisis (Tuberculosis)                                                    | Infectious               |
| 59                                                                                                                                                                                                                                                                                                            | 11    | 30  | 37   | Landrigan       | Charles Landrigan                               | M   | 2           | Infant       | Neckstis                                                                   | Other                    |
| 60                                                                                                                                                                                                                                                                                                            | 12    | 27  | 37   | Cook            | Thomas Cook                                     | M   | 30          | Young Adult  | Pneumonitis                                                                | Infectious               |
| 61                                                                                                                                                                                                                                                                                                            | 12    | 27  | 37   | Mooney          | Thomas Mooney                                   | M   | 34          | Middle Adult | Alt. data: stone: Dec 26, 1837 age 30                                      | Not Recorded             |
| 62                                                                                                                                                                                                                                                                                                            | 12    | 29  | 37   | Healey          | Timothy Healey                                  | M   | 32          | Middle Adult | Accident (by Waggon) [Wagon]                                               | Accident                 |
| 63                                                                                                                                                                                                                                                                                                            | 2     | 2   | 38   | Cook            | Thomas Cook                                     | M   | 24          | Young Adult  | Church record (no city record)                                             | Not Recorded             |
| 64                                                                                                                                                                                                                                                                                                            | 2     | 4   | 38   | Ledwidge        | James Ledwidge                                  | M   | 35          | Middle Adult | Hemorrhage                                                                 | Bleeding                 |
| 65                                                                                                                                                                                                                                                                                                            | 3     | 7   | 38   | Egan            | Ann Egan                                        | F   | 28          | Young Adult  | Phthisis (Tuberculosis)                                                    | Infectious               |
| 66                                                                                                                                                                                                                                                                                                            | 5     | 14  | 38   | Farigan         | Unknown                                         | M   | 22          | Young Adult  | Accident                                                                   | Accident                 |
| 67                                                                                                                                                                                                                                                                                                            | 7     | 2   | 38   | [Hannon] Fannon | Mary Fannon (Hannon)                            | F   | 23          | Young Adult  | Phthisis (Tuberculosis) (see record 97) (twin) (alt record: Jul. 10, 1838) | Infectious               |
| 68                                                                                                                                                                                                                                                                                                            | 7     | 2   | 38   | Rigan           | An infant of John Rigan                         | U   | -           | Infant       |                                                                            | Not Recorded             |
| 69                                                                                                                                                                                                                                                                                                            | 7     | 6   | 38   | Joice           | Bridget wife of Patrick Joice                   | F   | 20          | Young Adult  |                                                                            | Not Recorded             |
| 70                                                                                                                                                                                                                                                                                                            | 8     | 11  | 38   | Marlin          | Child of Lawrence Marlin                        | U   | 3           | Preschool    | Drowned                                                                    | Accident                 |
| 71                                                                                                                                                                                                                                                                                                            | 8     | 16  | 38   | Hayden          | Patrick Hayden                                  | M   | 25          | Young Adult  |                                                                            | Not Recorded             |
| 72                                                                                                                                                                                                                                                                                                            | 10    | 4   | 38   | Costello        | an infant of James Costello                     | U   | -           | Infant       |                                                                            | Not Recorded             |
| 73                                                                                                                                                                                                                                                                                                            | 10    | 5   | 38   | Furley          | an infant of John Furley                        | U   | -           | Infant       |                                                                            | Not Recorded             |
| 74                                                                                                                                                                                                                                                                                                            | 10    | 6   | 38   | Joice           | an infant of Patrick Joice                      | U   | -           | Infant       |                                                                            | Not Recorded             |
| 75                                                                                                                                                                                                                                                                                                            | 10    | 7   | 38   | Reynolds        | an infant of Thomas Reynolds                    | U   | 1           | Infant       |                                                                            | Not Recorded             |
| 76                                                                                                                                                                                                                                                                                                            | 10    | 7   | 38   | Lahy            | an infant of John Lahy                          | U   | -           | Infant       |                                                                            | Not Recorded             |
| 77                                                                                                                                                                                                                                                                                                            | 10    | 7   | 38   | Unknown         | an infant                                       | U   | -           | Infant       |                                                                            | Not Recorded             |
| 78                                                                                                                                                                                                                                                                                                            | 10    | 7   | 38   | Unknown         | an infant                                       | U   | -           | Infant       |                                                                            | Not Recorded             |
| 79                                                                                                                                                                                                                                                                                                            | 10    | 27  | 38   | Bannon          | Thomas Bannon                                   | M   | 35          | Middle Adult | a cold                                                                     | Infectious               |
| 80                                                                                                                                                                                                                                                                                                            | 11    | 2   | 38   | Toner           | Ann Toner (Toner)                               | F   | 15          | Adolescent   | a cold                                                                     | Infectious               |
| 81                                                                                                                                                                                                                                                                                                            | 11    | 10  | 38   | Ready           | Patrick Ready                                   | M   | 28          | Young Adult  | Dropsy                                                                     | Other                    |
| 82                                                                                                                                                                                                                                                                                                            | 11    | 10  | 38   | Kenev           | Patrick Kenev                                   | M   | 30          | Young Adult  | Drowned                                                                    | Accident                 |
| 83                                                                                                                                                                                                                                                                                                            | 11    | 10  | 38   | White           | Richard White                                   | M   | 38          | Middle Adult | Phthisis (Tuberculosis)                                                    | Infectious               |
| 84                                                                                                                                                                                                                                                                                                            | 11    | 10  | 38   | Healy           | Margaret Healy                                  | F   | -           | -            |                                                                            | Not Recorded             |
| 85                                                                                                                                                                                                                                                                                                            | 1     | 13  | 39   | Crawley         | Child of William Crawley                        | F   | 3m          | Infant       |                                                                            | Not Recorded             |
| 86                                                                                                                                                                                                                                                                                                            | 1     | 28  | 39   | Nevil           | John Nevil                                      | M   | 24          | Young Adult  | Scalded                                                                    | Accident                 |
| 87                                                                                                                                                                                                                                                                                                            | 2     | 8   | 39   | Crawley         | Dennis Crawley (Crawley)                        | M   | 38          | Middle Adult | Phthisis (Tuberculosis)                                                    | Infectious               |
| 88                                                                                                                                                                                                                                                                                                            | 6     | 10  | 39   | Conlin          | James Conlin (Conlan)                           | M   | 22          | Young Adult  | Drowned                                                                    | Accident                 |
| 89                                                                                                                                                                                                                                                                                                            | 7     | 1   | 39   | New             | John New (buried at Christ's Church)            | M   | 27          | Young Adult  | Drowned (added to McNally at St. Bernard's)                                | Accident                 |
| 90                                                                                                                                                                                                                                                                                                            | 7     | 1   | 39   | Splain          | John Splain                                     | M   | 28          | Young Adult  | Bowel Complaint                                                            | Gastrointestinal         |
| 91                                                                                                                                                                                                                                                                                                            | 7     | 1   | 39   | Galegan         | Michael Galegan                                 | M   | 30          | Young Adult  | Phthisis (Tuberculosis)                                                    | Infectious               |
| 92                                                                                                                                                                                                                                                                                                            | 7     | 1   | 39   | Whelan          | John Whelan                                     | M   | -           | -            | Phthisis                                                                   | Infectious               |
| 93                                                                                                                                                                                                                                                                                                            | 9     | 16  | 39   | Casey           | Mary Casey                                      | F   | 21          | Young Adult  |                                                                            | Not Recorded             |
| 94                                                                                                                                                                                                                                                                                                            | 10    | 15  | 39   | Quinn           | Owen Quinn                                      | M   | 30          | Young Adult  | Phthisis (Tuberculosis)                                                    | Infectious               |
| 95                                                                                                                                                                                                                                                                                                            | 10    | 15  | 39   | Hayes           | James Hayes                                     | M   | 40          | Middle Adult | a cold                                                                     | Infectious               |
| 96                                                                                                                                                                                                                                                                                                            | 11    | 8   | 39   | Riley           | James Riley (* Hale Record: Reilly)             | M   | 24          | Young Adult  | Phthisis (Tuberculosis) (Alt record: 5/13/1839)                            | Infectious               |
| 97                                                                                                                                                                                                                                                                                                            | 12    | 8   | 39   | Hannon          | John Hannon (twin)                              | M   | 27          | Young Adult  | Phthisis (Tuberculosis) (see record 67)                                    | Infectious               |
| 98                                                                                                                                                                                                                                                                                                            | 1     | 27  | 40   | Lynch           | John Lynch                                      | M   | 3           | Preschool    | Feb Catarrh                                                                | Infectious               |
| 99                                                                                                                                                                                                                                                                                                            | 1     | 27  | 40   | Carlin          | Patric Carlin                                   | M   | 44          | Middle Adult | Phthisis (Tuberculosis) (Consumption)                                      | Infectious               |
| 100                                                                                                                                                                                                                                                                                                           | 1     | 27  | 40   | Fury            | Patrick Fury (Furey)                            | M   | 44          | Middle Adult | Hydrosis (added to wife's stone St. Bernard's)                             | Other                    |
| 101                                                                                                                                                                                                                                                                                                           | 5     | 7   | 40   | Towel           | Michael Towel                                   | M   | 3           | Preschool    | Pneumonitis                                                                | Infectious               |
| 102                                                                                                                                                                                                                                                                                                           | 5     | 14  | 40   | Cannon          | James Cannon                                    | M   | 40          | Middle Adult | Phthisis (sic)                                                             | Infectious               |
| 103                                                                                                                                                                                                                                                                                                           | 5     | 15  | 40   | Coldwell        | Mary Coldwell                                   | F   | 27          | Young Adult  | Apoplexia                                                                  | Bleeding                 |
| 104                                                                                                                                                                                                                                                                                                           | 5     | 21  | 40   | Monahan         | Bridget Monahan                                 | F   | 30          | Young Adult  | Phthisis/Consumption (Tuberculosis)                                        | Infectious               |
| 105                                                                                                                                                                                                                                                                                                           | 6     | 10  | 40   | Healy           | Infant of John Healy                            | U   | 1d          | Infant       | Infantile                                                                  | Not Recorded             |
| 106                                                                                                                                                                                                                                                                                                           | 6     | 10  | 40   | Healy           | Infant of John Healy                            | U   | 4d          | Infant       |                                                                            | Not Recorded             |
| 107                                                                                                                                                                                                                                                                                                           | 6     | 13  | 40   | Benham          | Marv Benham                                     | F   | 40          | Middle Adult | Phthisis/Consumption (Tuberculosis)                                        | Infectious               |
| 108                                                                                                                                                                                                                                                                                                           | 7     | 27  | 40   | Healy           | Dennis Healy                                    | M   | 40          | Middle Adult | Church record (no city record)                                             | Not Recorded             |
| 109                                                                                                                                                                                                                                                                                                           | 7     | 29  | 40   | Macintire       | John Macintire (from Bridgeport)                | M   | 32          | Middle Adult | Intemperance                                                               | Liver Disease/Alcoholism |
| 110                                                                                                                                                                                                                                                                                                           | 7     | 29  | 40   | Carl            | Laurence Carl                                   | M   | 40          | Middle Adult | Intemperance                                                               | Liver Disease/Alcoholism |
| 111                                                                                                                                                                                                                                                                                                           | 7     | 29  | 40   | Donnelly        | Cornelius Donnelly                              | M   | 48          | Mature Adult | Phthisis/Consumption (Tuberculosis)                                        | Infectious               |
| 112                                                                                                                                                                                                                                                                                                           | 1     | 4   | 41   | Delaney         | Susannah Delaney                                | F   | 1.3         | Infant       | Church record (no city record) (see record 182)                            | Not Recorded             |
| 113                                                                                                                                                                                                                                                                                                           | 7     | 12  | 41   | Gilmour         | Mary Gilmour (Gilmer)                           | F   | 28          | Young Adult  | Erysipelas                                                                 | Infectious               |
| 114                                                                                                                                                                                                                                                                                                           | 9     | 29  | 41   | Hurley          | James Hurley                                    | M   | 37          | Middle Adult | Church record (no city record)                                             | Not Recorded             |
| 115                                                                                                                                                                                                                                                                                                           | 1     | 27  | 42   | Donnegan        | Margaret Donnegan (Dunigan [sp.] wife of James) | F   | 36          | Middle Adult | Febr. Puerper                                                              | Childbirth               |
| 116                                                                                                                                                                                                                                                                                                           | 2     | 23  | 42   | Horley          | William Horley                                  | M   | 28          | Young Adult  |                                                                            | Not Recorded             |
| 117                                                                                                                                                                                                                                                                                                           | 2     | 23  | 42   | Corbitt         | William Corbitt                                 | M   | 42          | Middle Adult |                                                                            | Not Recorded             |
| 118                                                                                                                                                                                                                                                                                                           | 6     | 30  | 42   | Flood           | John Flood                                      | M   | 32          | Middle Adult | Fractured spine from a fall                                                | Accident                 |

| Supplementary Table S1. Chronological data on burials (1834-1851) at Christ's Church St. John's the Evangelist Churches, Davenport Ave. & South St. New Haven, Connecticut. Individuals where trauma is recorded cause of death are in bold. Periods of infectious disease in bold box. See text for details. |       |     |      |              |                                                      |          |             |                     |                                                            |                          |
|---------------------------------------------------------------------------------------------------------------------------------------------------------------------------------------------------------------------------------------------------------------------------------------------------------------|-------|-----|------|--------------|------------------------------------------------------|----------|-------------|---------------------|------------------------------------------------------------|--------------------------|
| Rec.                                                                                                                                                                                                                                                                                                          | Month | Day | Year | Surname      | Name of Person / Non-New Haven origin                | Sex      | Age (years) | Age Class           | Recorded cause of death/Notes                              | Recorded Cause of Death  |
| 119                                                                                                                                                                                                                                                                                                           | 7     | 30  | 42   | Dorland      | Ann Dorland                                          | F        | 24          | Young Adult         |                                                            | Not Recorded             |
| 120                                                                                                                                                                                                                                                                                                           | 8     | 16  | 42   | Riley        | Daniel Riley                                         | M        | 24          | Young Adult         | Phthisis [Tuberculosis]                                    | Infectious               |
| 121                                                                                                                                                                                                                                                                                                           | 8     | 28  | 42   | Comlin       | John Comlin (from Salem)                             | M        | 22          | Young Adult         | Drowned at Salem                                           | Accident                 |
| 122                                                                                                                                                                                                                                                                                                           | 8     | 28  | 42   | Donnally     | James Donnally                                       | M        | 25          | Young Adult         | Church record (no city record)                             | Not Recorded             |
| 123                                                                                                                                                                                                                                                                                                           | 10    | 12  | 42   | Duff         | Margaret Duff (wife of Simon)                        | F        | 25          | Young Adult         | Church record (no city record)                             | Not Recorded             |
| 124                                                                                                                                                                                                                                                                                                           | 11    | 28  | 42   | Orstrop      | John Orstrop                                         | M        | 37          | Middle Adult        | Febr. Typhus                                               | Infectious               |
| 125                                                                                                                                                                                                                                                                                                           | 1     | 10  | 43   | Fitzpatrick  | Child of Thomas Fitzpatrick                          | U        | 8           | Child               | Scrophula                                                  | Infectious               |
| 126                                                                                                                                                                                                                                                                                                           | 1     | 24  | 43   | Leahy        | Thomas Leahy                                         | M        | 68          | Elderly             | Phthisis [Tuberculosis]                                    | Infectious               |
| 127                                                                                                                                                                                                                                                                                                           | 1     | 30  | 43   | Conaughly    | Child of Thomas Conaughly                            | U        | 1           | Infant              |                                                            | Not Recorded             |
| 128                                                                                                                                                                                                                                                                                                           | 2     | 28  | 43   | Mooney       | Emma Mooney                                          | F        | 19          | Young Adult         | Puerperal                                                  | Childbirth               |
| 129                                                                                                                                                                                                                                                                                                           | 3     | 5   | 43   | Brady        | Infant of Hugh Brady                                 | U        | 6m          | Infant              | (see record 328)                                           | Not Recorded             |
| 130                                                                                                                                                                                                                                                                                                           | 3     | 10  | 43   | Allen        | Infant of Ed Allen                                   | U        | 1           | Infant              |                                                            | Not Recorded             |
| 131                                                                                                                                                                                                                                                                                                           | 3     | 10  | 43   | Unknown      | a child                                              | U        | 2           | Infant              |                                                            | Not Recorded             |
| 132                                                                                                                                                                                                                                                                                                           | 3     | 19  | 43   | Murphy       | Infant of Edward Murphy                              | U        | 2m          | Infant              |                                                            | Not Recorded             |
| 133                                                                                                                                                                                                                                                                                                           | 3     | 22  | 43   | Eastrop      | John Eastrop                                         | M        | 44          | Infant              |                                                            | Not Recorded             |
| 134                                                                                                                                                                                                                                                                                                           | 5     | 16  | 43   | Unknown      | An infant aged under                                 | U        | 1           | Infant              |                                                            | Not Recorded             |
| 135                                                                                                                                                                                                                                                                                                           | 5     | 16  | 43   | Unknown      | An infant aged under                                 | U        | 1           | Infant              |                                                            | Not Recorded             |
| 136                                                                                                                                                                                                                                                                                                           | 5     | 16  | 43   | Unknown      | An infant aged under                                 | U        | 1           | Infant              |                                                            | Not Recorded             |
| 137                                                                                                                                                                                                                                                                                                           | 5     | 16  | 43   | Magil        | Edward Magil                                         | M        | 3           | Preschool           | Scarlatina                                                 | Infectious               |
| 138                                                                                                                                                                                                                                                                                                           | 6     | 1   | 43   | Delaney      | Catherine Delaney                                    | F        | 3.6         | Preschool           | Church record (no city record)                             | Not Recorded             |
| 139                                                                                                                                                                                                                                                                                                           | 6     | 7   | 43   | Mullen       | Wife of Michael Mullen (Ann)                         | F        | 20          | Young Adult         |                                                            | Not Recorded             |
| 140                                                                                                                                                                                                                                                                                                           | 6     | 11  | 43   | McGrath      | Infant of Thomas McGrath                             | U        | 1           | Infant              |                                                            | Not Recorded             |
| 141                                                                                                                                                                                                                                                                                                           | 6     | 18  | 43   | Boudren      | Michael Boudren                                      | M        | 40          | Middle Adult        | Phthisis [Tuberculosis]                                    | Infectious               |
| 142                                                                                                                                                                                                                                                                                                           | 6     | 18  | 43   | Leary        | Infant of Daniel Leary                               | U        | 11m         | Infant              |                                                            | Not Recorded             |
| 143                                                                                                                                                                                                                                                                                                           | 6     | 20  | 43   | Flood        | Mary Ann Flood                                       | F        | 6           | Child               | Scarlatina                                                 | Infectious               |
| 144                                                                                                                                                                                                                                                                                                           | 8     | 9   | 43   | Keoman       | John Keoman                                          | M        | 4           | Preschool           |                                                            | Not Recorded             |
| 145                                                                                                                                                                                                                                                                                                           | 9     | 12  | 43   | Bleagkley    | Robert Bleagkley [son of James & Susan]              | M        | 7           | Child               | Church record (no city record)                             | Not Recorded             |
| 146                                                                                                                                                                                                                                                                                                           | 9     | 12  | 43   | Samon        | Mary, wife of John Samon                             | F        | 45          | Middle Adult        |                                                            | Not Recorded             |
| 147                                                                                                                                                                                                                                                                                                           | 9     | 29  | 43   | Mooney       | Julia, wife of Lawrence Mooney                       | F        | 29          | Young Adult         | Hydrops (stone: Sept. 19, 1843)                            | Other                    |
| 148                                                                                                                                                                                                                                                                                                           | 11    | 4   | 43   | Mury         | Mary, daughter of Pat Mury                           | F        | 1.2         | Infant              |                                                            | Not Recorded             |
| 149                                                                                                                                                                                                                                                                                                           | 11    | 9   | 43   | Obevy        | Infant of Henry Obevy                                | U        | -           | Infant              |                                                            | Not Recorded             |
| 150                                                                                                                                                                                                                                                                                                           | 1     | 1   | 44   | Short        | Bernard Short                                        | M        | 50          | Mature Adult        | Fever                                                      | Infectious               |
| 151                                                                                                                                                                                                                                                                                                           | 1     | 4   | 44   | Hall         | John Hall                                            | M        | 4           | Preschool           | Brain fever                                                | Infectious               |
| 152                                                                                                                                                                                                                                                                                                           | 1     | 9   | 44   | Brazil       | Margarette Brazil                                    | F        | 67          | Elderly             | Pneumonitis                                                | Infectious               |
| 153                                                                                                                                                                                                                                                                                                           | 1     | 13  | 44   | Quenlan      | John Quenlan                                         | M        | 4m          | Infant              |                                                            | Not Recorded             |
| 154                                                                                                                                                                                                                                                                                                           | 2     | 2   | 44   | O'Neal       | John O'Neal                                          | M        | 2           | Infant              | Brain fever                                                | Infectious               |
| 155                                                                                                                                                                                                                                                                                                           | 2     | 8   | 44   | Driscoll     | Dennis Driscoll                                      | M        | 17          | Adolescent          | Fever                                                      | Infectious               |
| 156                                                                                                                                                                                                                                                                                                           | 2     | 15  | 44   | Hurley       | John Hurley                                          | M        | 53          | Mature Adult        | Pneumonitis                                                | Infectious               |
| 157                                                                                                                                                                                                                                                                                                           | 2     | 28  | 44   | Cold         | John Cold                                            | M        | 40          | Middle Adult        |                                                            | Not Recorded             |
| 158                                                                                                                                                                                                                                                                                                           | 3     | 30  | 44   | Galegan      | James Galegan                                        | M        | 4.5         | Preschool           | Scarlatina                                                 | Infectious               |
| 159                                                                                                                                                                                                                                                                                                           | 4     | 8   | 44   | Galigan      | Catherine Galigan                                    | F        | 3           | Preschool           | Scarlatina                                                 | Infectious               |
| 160                                                                                                                                                                                                                                                                                                           | 4     | 8   | 44   | Craveley     | Ellen Craveley                                       | F        | 1d          | Infant              | Infantile                                                  | Not Recorded             |
| 161                                                                                                                                                                                                                                                                                                           | 4     | 8   | 44   | Lary         | Bridget Lary                                         | F        | 8m          | Infant              |                                                            | Not Recorded             |
| 162                                                                                                                                                                                                                                                                                                           | 5     | 7   | 44   | Healy        | Catherine Healy                                      | F        | 6           | Child               | Scarlatina                                                 | Infectious               |
| 163                                                                                                                                                                                                                                                                                                           | 5     | 7   | 44   | Murphy       | Philip Murphy                                        | M        | 20          | Young Adult         | Phthisis [Tuberculosis]                                    | Infectious               |
| 164                                                                                                                                                                                                                                                                                                           | 6     | 8   | 44   | Ellis        | Bridget Ellis                                        | F        | 38          | Middle Adult        | Phthisis [Tuberculosis]                                    | Infectious               |
| 165                                                                                                                                                                                                                                                                                                           | 6     | 18  | 44   | Costello     | Child of Peter Costello                              | U        | 5           | Preschool           | Scarlatina                                                 | Infectious               |
| 166                                                                                                                                                                                                                                                                                                           | 6     | 18  | 44   | Costello     | Child of Peter Costello                              | U        | 7m          | Infant              | Scarlatina                                                 | Infectious               |
| 167                                                                                                                                                                                                                                                                                                           | 6     | 22  | 44   | Costello     | Child of Peter Costello                              | U        | 3           | Preschool           | Scarlatina                                                 | Infectious               |
| 168                                                                                                                                                                                                                                                                                                           | 7     | 9   | 44   | Cosgrove     | Mary Cosgrif (Cosgrove) (wife of Henry)              | F        | 35          | Middle Adult        | feb. Puerperal (stone: July 6, 1844)                       | Childbirth               |
| 169                                                                                                                                                                                                                                                                                                           | 8     | 1   | 44   | Dwyer        | Son of Patrick Dwyer                                 | M        | 9m          | Infant              |                                                            | Not Recorded             |
| 170                                                                                                                                                                                                                                                                                                           | 8     | 23  | 44   | Darey        | Christopher Darey (D'Arcey)                          | M        | 28          | Young Adult         | Phthisis [Tuberculosis] (alt record: Aug. 22, 1844)        | Infectious               |
| 171                                                                                                                                                                                                                                                                                                           | 9     | 29  | 44   | Murphy       | John Murphy                                          | M        | 2.75        | Infant              |                                                            | Not Recorded             |
| 172                                                                                                                                                                                                                                                                                                           | 11    | 2   | 44   | Brady        | Henry Brady (son of Hugh & Catherine)                | M        | -           | -                   | Church record (no city record) (see record 328)            | Not Recorded             |
| 173                                                                                                                                                                                                                                                                                                           | 11    | 6   | 44   | Sheridan     | Michael Sheridan                                     | M        | 78          | Elderly             |                                                            | Not Recorded             |
| 174                                                                                                                                                                                                                                                                                                           | 11    | 10  | 44   | Pruhil       | John Pruhil                                          | M        | 4           | Preschool           | Phthisis                                                   | Infectious               |
| 175                                                                                                                                                                                                                                                                                                           | 12    | 27  | 44   | Costello     | Matthew Costello                                     | M        | 30          | Young Adult         | Apoplexia                                                  | Other                    |
| 176                                                                                                                                                                                                                                                                                                           | 1     | 11  | 45   | Smith        | Peter Smith                                          | M        | 1.4         | Infant              | Febr. Catarrhal                                            | Infectious               |
| 177                                                                                                                                                                                                                                                                                                           | 1     | 11  | 45   | McMaus       | William McMaus                                       | M        | 20          | Young Adult         | Phthisis [Tuberculosis]                                    | Infectious               |
| 178                                                                                                                                                                                                                                                                                                           | 3     | 1   | 45   | Drvine       | Child of Patrick Drvine                              | U        | 6           | Child               |                                                            | Not Recorded             |
| 179                                                                                                                                                                                                                                                                                                           | 4     | 2   | 45   | Rechel       | Child of Terence Rechel                              | U        | 1.5         | Infant              | Cynanche Trachealis                                        | Infectious               |
| 180                                                                                                                                                                                                                                                                                                           | 4     | 19  | 45   | Turner       | Patrick Turner                                       | M        | 28          | Young Adult         | Pneumonitis                                                | Infectious               |
| 181                                                                                                                                                                                                                                                                                                           | 4     | 22  | 45   | O'Connor     | Bernard O'Connor                                     | M        | 3           | Preschool           |                                                            | Not Recorded             |
| 182                                                                                                                                                                                                                                                                                                           | 5     | 11  | 45   | Delaney      | Child (Susannah Delaney) (from Waterbury)            | U        | 9m          | Infant              | from out of town (see records 112)                         | Not Recorded             |
| 183                                                                                                                                                                                                                                                                                                           | 7     | 20  | 45   | Reynolds     | Wife of Francis Reynolds                             | F        | 30          | Young Adult         |                                                            | Not Recorded             |
| 184                                                                                                                                                                                                                                                                                                           | 7     | 20  | 45   | Lee          | John Lee                                             | M        | 1d          | Infant              |                                                            | Not Recorded             |
| 185                                                                                                                                                                                                                                                                                                           | 7     | 20  | 45   | Farrell      | Child of Thomas Farrell                              | U        | 3m          | Infant              |                                                            | Not Recorded             |
| 186                                                                                                                                                                                                                                                                                                           | 7     | 20  | 45   | Harrigan     | Child of John Harrigan                               | U        | 5m          | Infant              |                                                            | Not Recorded             |
| 187                                                                                                                                                                                                                                                                                                           | 8     | 8   | 45   | Reynolds     | Thomas Reynolds                                      | M        | 35          | Middle Adult        | Phthisis [Tuberculosis] (alt record: August 7, 1845)       | Infectious               |
| 188                                                                                                                                                                                                                                                                                                           | 8     | 8   | 45   | Cawton Irish | Michael Cawton Irish                                 | M        | 60          | Mature Adult        | Phthisis [Tuberculosis] at Almshouse                       | Infectious               |
| 189                                                                                                                                                                                                                                                                                                           | 8     | 11  | 45   | Reynolds     | Catherine Reynolds                                   | F        | 9m          | Infant              |                                                            | Not Recorded             |
| 190                                                                                                                                                                                                                                                                                                           | 8     | 24  | 45   | Reynolds     | Bridget Reynolds                                     | F        | 2.5         | Infant              | Varicelus                                                  | Infectious               |
| 191                                                                                                                                                                                                                                                                                                           | 8     | 27  | 45   | Riley        | Child of Patrick Riley (from Waterbury)              | U        | 1m          | Infant              |                                                            | Not Recorded             |
| 192                                                                                                                                                                                                                                                                                                           | 8     | 27  | 45   | Costello     | Child of Matthew Costello                            | U        | 6m          | Infant              |                                                            | Not Recorded             |
| 193                                                                                                                                                                                                                                                                                                           | 9     | 16  | 45   | Flood        | Child of Richard Flood                               | U        | 2           | Infant              | Pertussis                                                  | Infectious               |
| 194                                                                                                                                                                                                                                                                                                           | 9     | 16  | 45   | Downes       | Michael Downes                                       | M        | 52          | Mature Adult        | Apoplexia (see record 580)                                 | Other                    |
| 195                                                                                                                                                                                                                                                                                                           | 9     | 19  | 45   | Flood        | Bridget Flood (Mary [daughter of] Matthew & Bridget) | F        | 2           | Infant              | Pertussis (Vit. Stat. Bridget / stone: Mary)               | Infectious               |
| 196                                                                                                                                                                                                                                                                                                           | 9     | 19  | 45   | Knowland     | Child of Daniel Knowland or Ouland                   | U        | 3m          | Infant              | Phthisis                                                   | Infectious               |
| 197                                                                                                                                                                                                                                                                                                           | 9     | 19  | 45   | Millegan     | Child of Michael Millegan                            | U        | 4m          | Infant              |                                                            | Not Recorded             |
| 198                                                                                                                                                                                                                                                                                                           | 9     | 19  | 45   | Caffrey      | Child of Catherine Caffrey                           | U        | 6m          | Infant              |                                                            | Not Recorded             |
| 199                                                                                                                                                                                                                                                                                                           | 10    | 22  | 45   | Hurley       | John Hurley                                          | M        | 23          | Young Adult         | Phthisis [Tuberculosis]                                    | Infectious               |
| 200                                                                                                                                                                                                                                                                                                           | 10    | 24  | 45   | Gallager     | Patrick Gallager (Gallagher)                         | M        | 30          | Young Adult         | Hydrops                                                    | Other                    |
| 201                                                                                                                                                                                                                                                                                                           | 11    | 3   | 45   | Finnegan     | James Finnegan                                       | M        | 25          | Young Adult         | Jaundice                                                   | Liver Disease/Alcoholism |
| 202                                                                                                                                                                                                                                                                                                           | 11    | 3   | 45   | Ryan         | Child of Charles Ryan                                | U        | 6m          | Infant              | Pertussis                                                  | Infectious               |
| 203                                                                                                                                                                                                                                                                                                           | 12    | 7   | 45   | Touhey       | Ann Touhey (wife of Patrick Touhey)                  | F        | 53          | Mature Adult        | Church record (no city record)                             | Not Recorded             |
| 204                                                                                                                                                                                                                                                                                                           | 1     | 18  | 46   | Meloy        | Ellen Meloy                                          | F        | 22          | Young Adult         | Insanity                                                   | Other                    |
| 205                                                                                                                                                                                                                                                                                                           | 1     | 20  | 46   | Nowland      | Child of William Nowland                             | U        | 6m          | Infant              | Croup                                                      | Infectious               |
| 206                                                                                                                                                                                                                                                                                                           | 1     | 20  | 46   | Wallace      | Child of Thomas Wallace                              | U        | 7m          | Infant              | Hydrocephalus                                              | Other                    |
| 207                                                                                                                                                                                                                                                                                                           | 1     | 27  | 46   | Gululy       | Mary Gululy (Githuly)                                | F        | 21          | Young Adult         | Fever (alt record: Jan. 26, 1846)                          | Infectious               |
| 208                                                                                                                                                                                                                                                                                                           | 2     | 8   | 46   | Reilly       | Child of John Reilly                                 | U        | 1m          | Infant              |                                                            | Not Recorded             |
| 209                                                                                                                                                                                                                                                                                                           | 2     | 10  | 46   | Sheridan     | Mary Sheridan                                        | F        | 26          | Young Adult         | Phthisis [Tuberculosis]                                    | Infectious               |
| 210                                                                                                                                                                                                                                                                                                           | 3     | 7   | 46   | Kane         | Patrick Kane                                         | M        | 48          | Mature Adult        | Pneumonitis                                                | Infectious               |
| 211                                                                                                                                                                                                                                                                                                           | 3     | 7   | 46   | Driscoll     | Child of Dennis O. Driscoll                          | U        | 1m          | Infant              |                                                            | Not Recorded             |
| 212                                                                                                                                                                                                                                                                                                           | 3     | 15  | 46   | Keams        | John, son of Peter Keams                             | M        | 2           | Infant              |                                                            | Not Recorded             |
| 213                                                                                                                                                                                                                                                                                                           | 5     | 2   | 46   | Kenamey      | Martin Kenamey                                       | M        | 40          | Middle Adult        | Church record (no city record)                             | Not Recorded             |
| 214                                                                                                                                                                                                                                                                                                           | 5     | 4   | 46   | Foley        | William Foley (son of Willam & Francis) (From Derby) | M        | 8           | Child               | (alt record: May 3 1846)                                   | Not Recorded             |
| 215                                                                                                                                                                                                                                                                                                           | 5     | 8   | 46   | McInemey     | Mary McInemey                                        | F        | 35          | Middle Adult        | Phthisis [Tuberculosis]                                    | Infectious               |
| 216                                                                                                                                                                                                                                                                                                           | 6     | 27  | 46   | Healy        | Dennis Healy                                         | M        | 40          | Middle Adult        | Delirium Tremens                                           | Liver Disease/Alcoholism |
| 217                                                                                                                                                                                                                                                                                                           | 7     | 12  | 46   | Crawley      | Catherine Crawley                                    | F        | 9m          | Infant              | Pneumonitis                                                | Infectious               |
| 218                                                                                                                                                                                                                                                                                                           | 7     | 14  | 46   | McKay        | Child of William McKay                               | U        | 6m          | Infant              |                                                            | Not Recorded             |
| 219                                                                                                                                                                                                                                                                                                           | 7     | 21  | 46   | Unknown      | An infant                                            | U        | 12d         | Infant              | Infantile                                                  | Not Recorded             |
| 220                                                                                                                                                                                                                                                                                                           | 8     | 15  | 46   | McEnally     | Child of Thomas McEnally                             | U        | 6m          | Infant              |                                                            | Not Recorded             |
| 221                                                                                                                                                                                                                                                                                                           | 8     | 23  | 46   | Gray         | Bernard Gray                                         | M        | 33          | Middle Adult        | Icterus (Grave stone: Aug. 28, 1846 age 36)                | Liver Disease/Alcoholism |
| 222                                                                                                                                                                                                                                                                                                           | 9     | 7   | 46   | Costello     | Child of Daniel Costello                             | U        | 1           | Infant              | Pneumonitis                                                | Infectious               |
| 223                                                                                                                                                                                                                                                                                                           | 9     | 10  | 46   | Gululy       | James Gululy (Githuly)                               | M        | 25          | Young Adult         | Fever (Grave stone: Sept. 9, 1846)                         | Infectious               |
| 224                                                                                                                                                                                                                                                                                                           | 10    | 2   | 46   | Barry        | Widow Barry                                          | F        | 34          | Middle Adult        | Phthisis [Tuberculosis]                                    | Infectious               |
| 225                                                                                                                                                                                                                                                                                                           | 10    | 6   | 46   | Malone       | Mary Malone                                          | F        | 30          | Young Adult         | Pneumonitis                                                | Infectious               |
| 226                                                                                                                                                                                                                                                                                                           | 10    | 6   | 46   | Bannon       | Ann Bannon wife of Patrick                           | F        | 42          | Middle Adult        | Church record (no city record)                             | Not Recorded             |
| 227                                                                                                                                                                                                                                                                                                           | 10    | 8   | 46   | O'Neal       | Alice O'Neal                                         | F        | 63          | Mature Adult        | Jaundice                                                   | Liver Disease/Alcoholism |
| 228                                                                                                                                                                                                                                                                                                           | 10    | 10  | 46   | Read         | Mary Read (from Waterbury)                           | F        | 40          | Middle Adult        |                                                            | Not Recorded             |
| 229                                                                                                                                                                                                                                                                                                           | 10    | 16  | 46   | Costello     | Mary Costello                                        | F        | 3           | Preschool           | Dropsy                                                     | Other                    |
| 230                                                                                                                                                                                                                                                                                                           | 11    | 8   | 46   | Mooney       | Alice Mooney                                         | F        | 63          | Mature Adult        | Church record (no city record)                             | Not Recorded             |
| 231                                                                                                                                                                                                                                                                                                           | 12    | 17  | 46   | Hurley       | Timothy Hurley                                       | M        | 63          | Mature Adult        | Pneumonitis                                                | Infectious               |
| 232                                                                                                                                                                                                                                                                                                           | 12    | 18  | 46   | Halem        | <b>Bridget Halem (Hollaren)</b>                      | <b>F</b> | <b>31</b>   | <b>Middle Adult</b> | <b>Accident (runaway horse) (alt record: Dec. 15 1846)</b> | <b>Accident</b>          |
| 233                                                                                                                                                                                                                                                                                                           | 12    | 19  | 46   | Reily        | Cicely Reily                                         | F        | 30          | Young Adult         | Paralysis                                                  | Other                    |
| 234                                                                                                                                                                                                                                                                                                           | 1     | 5   | 47   | Fhorty       | Son of Michael Fhorty                                | M        | 1.4         | Infant              |                                                            | Not Recorded             |
| 235                                                                                                                                                                                                                                                                                                           | 1     | 5   | 47   | Flood        | Matthew Flood                                        | M        | 2.25        | Infant              | Fever                                                      | Infectious               |
| 236                                                                                                                                                                                                                                                                                                           | 1     | 31  | 47   | Brady        | Wife of Nicholas Brady (Margaret) (see 585)          | F        | 37          | Middle Adult        | Delirium Tremens                                           | Liver Disease/Alcoholism |

| Supplementary Table S1. Chronological data on burials (1834-1851) at Christ's Church St. John's the Evangelist Churches, Davenport Ave. & South St. New Haven, Connecticut. Individuals where trauma is recorded cause of death are in bold. Periods of infectious disease in bold box. See text for details. |       |     |      |                      |                                                |     |             |              |                                                                                      |                          |
|---------------------------------------------------------------------------------------------------------------------------------------------------------------------------------------------------------------------------------------------------------------------------------------------------------------|-------|-----|------|----------------------|------------------------------------------------|-----|-------------|--------------|--------------------------------------------------------------------------------------|--------------------------|
| Rec.                                                                                                                                                                                                                                                                                                          | Month | Day | Year | Surname              | Name of Person / Non-New Haven origin          | Sex | Age (years) | Age Class    | Recorded cause of death/Notes                                                        | Recorded Cause of Death  |
| 237                                                                                                                                                                                                                                                                                                           | 2     | 6   | 47   | Carroll              | Child of Patrick Carroll                       | U   | 3m          | Infant       | Small Pox                                                                            | Infectious               |
| 238                                                                                                                                                                                                                                                                                                           | 2     | 17  | 47   | Coogan               | Michael Coogan                                 | M   | 48          | Mature Adult | Paralysis                                                                            | Other                    |
| 239                                                                                                                                                                                                                                                                                                           | 3     | 4   | 47   | Dolsey               | Ann Dolsey                                     | F   | 35          | Middle Adult | Phthisis [Tuberculosis]                                                              | Infectious               |
| 240                                                                                                                                                                                                                                                                                                           | 3     | 17  | 47   | Keeshan              | Wife of Dennis Keeshan                         | F   | 40          | Middle Adult | Delirium Tremens                                                                     | Liver Disease/Alcoholism |
| 241                                                                                                                                                                                                                                                                                                           | 3     | 17  | 47   | Dignon               | Mary Dignon                                    | F   | 3m          | Infant       | Convulsions                                                                          | Other                    |
| 242                                                                                                                                                                                                                                                                                                           | 3     | 18  | 47   | Kain                 | Thomas Kain                                    | M   | 60          | Mature Adult | Pneumonitis                                                                          | Infectious               |
| 243                                                                                                                                                                                                                                                                                                           | 3     | 18  | 47   | Burns                | Child of Michael Burns                         | U   | 1d          | Infant       | Infantile                                                                            | Not Recorded             |
| 244                                                                                                                                                                                                                                                                                                           | 4     | 3   | 47   | Smvth                | Julia Smvth                                    | F   | 25          | Young Adult  | Church record (no city record)                                                       | Not Recorded             |
| 245                                                                                                                                                                                                                                                                                                           | 4     | 7   | 47   | Hogan                | Michael Hogan                                  | M   | 45          | Middle Adult | Phthisis [Tuberculosis]                                                              | Infectious               |
| 246                                                                                                                                                                                                                                                                                                           | 4     | 8   | 47   | Reynolds             | Philip Reynolds                                | M   | 29          | Young Adult  | Ship Fever [Typhus]                                                                  | Infectious               |
| 247                                                                                                                                                                                                                                                                                                           | 4     | 13  | 47   | Phelan               | Michael Phelan                                 | M   | 21          | Young Adult  | Ship Fever [Typhus]                                                                  | Infectious               |
| 248                                                                                                                                                                                                                                                                                                           | 4     | 16  | 47   | McEloney             | Son of Thomas McEloney                         | M   | 4           | Preschool    | Burn                                                                                 | Accident                 |
| 249                                                                                                                                                                                                                                                                                                           | 4     | 28  | 47   | Tieman               | Patrick Tieman                                 | M   | 35          | Middle Adult | Drowned                                                                              | Accident                 |
| 250                                                                                                                                                                                                                                                                                                           | 5     | 5   | 47   | Kidnev               | William Kidnev                                 | M   | 44          | Middle Adult | Hematemesis                                                                          | Bleeding                 |
| 251                                                                                                                                                                                                                                                                                                           | 5     | 5   | 47   | Smith                | Rose, wife of Michael Smith                    | F   | -           | -            | Phthisis                                                                             | Infectious               |
| 252                                                                                                                                                                                                                                                                                                           | 5     | 6   | 47   | Sheridan             | Julia Sheridan                                 | F   | 26          | Young Adult  | Puerperal                                                                            | Childbirth               |
| 253                                                                                                                                                                                                                                                                                                           | 5     | 6   | 47   | Turbott              | Peter Turbott                                  | M   | 27          | Young Adult  | Phthisis [Tuberculosis]                                                              | Infectious               |
| 254                                                                                                                                                                                                                                                                                                           | 5     | 17  | 47   | McDonald             | Andrew McDonald                                | M   | 16          | Adolescent   | Ship Fever [Typhus]                                                                  | Infectious               |
| 255                                                                                                                                                                                                                                                                                                           | 5     | 18  | 47   | Ryan                 | Patrick Ryan                                   | M   | 34          | Middle Adult | Drowned                                                                              | Accident                 |
| 256                                                                                                                                                                                                                                                                                                           | 5     | 18  | 47   | Nally                | Thomas Nally                                   | M   | 49          | Mature Adult | Ship Fever [Typhus]                                                                  | Infectious               |
| 257                                                                                                                                                                                                                                                                                                           | 5     | 20  | 47   | McGennis             | Thomas McGennis                                | M   | 49          | Mature Adult | Ship Fever [Typhus]                                                                  | Infectious               |
| 258                                                                                                                                                                                                                                                                                                           | 5     | 27  | 47   | Collins              | Child of James Collins (from Meriden)          | U   | 7           | Child        | died in Meriden                                                                      | Not Recorded             |
| 259                                                                                                                                                                                                                                                                                                           | 5     | 27  | 47   | Larmens              | William Larmens                                | M   | 20          | Young Adult  | Fever                                                                                | Infectious               |
| 260                                                                                                                                                                                                                                                                                                           | 6     | 10  | 47   | Thomas               | John Thomas                                    | M   | 17          | Adolescent   | Ship Fever [Typhus]                                                                  | Infectious               |
| 261                                                                                                                                                                                                                                                                                                           | 6     | 15  | 47   | Burns                | Thomas Burns                                   | M   | 30          | Young Adult  | Ship Fever [Typhus]                                                                  | Infectious               |
| 262                                                                                                                                                                                                                                                                                                           | 6     | 24  | 47   | Furber               | Child of Peter Furber                          | U   | 11m         | Infant       |                                                                                      | Not Recorded             |
| 263                                                                                                                                                                                                                                                                                                           | 6     | 24  | 47   | Nally                | Child of Thomas Nally                          | U   | 11m         | Infant       |                                                                                      | Not Recorded             |
| 264                                                                                                                                                                                                                                                                                                           | 6     | 24  | 47   | [Cavanaugh] Kavanagh | Child of Thomas Kavanagh (& Margaret)          | U   | 1m          | Infant       | (July 15, 1847 age 6 mos.) (see record 367)                                          | Not Recorded             |
| 265                                                                                                                                                                                                                                                                                                           | 7     | 12  | 47   | Reynolds             | Ann Reynolds                                   | F   | 32          | Middle Adult | Ship Fever [Typhus]                                                                  | Infectious               |
| 266                                                                                                                                                                                                                                                                                                           | 7     | 16  | 47   | Reynolds             | Thomas Reynolds                                | M   | 36          | Middle Adult | Ship Fever [Typhus]                                                                  | Infectious               |
| 267                                                                                                                                                                                                                                                                                                           | 7     | 22  | 47   | Morgan               | Child of Patrick Morgan                        | U   | 2           | Infant       | Colic                                                                                | Other                    |
| 268                                                                                                                                                                                                                                                                                                           | 7     | 23  | 47   | McCahil              | Ellen McCahil                                  | F   | 26          | Young Adult  | Ship Fever [Typhus]                                                                  | Infectious               |
| 269                                                                                                                                                                                                                                                                                                           | 7     | 23  | 47   | Costello             | Bridget Costello, wife of James                | F   | 28          | Young Adult  | Dropsy                                                                               | Other                    |
| 270                                                                                                                                                                                                                                                                                                           | 7     | 24  | 47   | Keornan              | Son of Dan Keornan                             | M   | 2           | Infant       | Cholera Infantum                                                                     | Infectious               |
| 271                                                                                                                                                                                                                                                                                                           | 7     | 26  | 47   | Morgan               | Daughter of Patrick Morgan                     | F   | 9           | Child        |                                                                                      | Not Recorded             |
| 272                                                                                                                                                                                                                                                                                                           | 8     | 1   | 47   | Strong               | Richard Strong (son of Martin & Ann)           | M   | 6m          | Infant       | Church record (no city record)                                                       | Not Recorded             |
| 273                                                                                                                                                                                                                                                                                                           | 8     | 3   | 47   | Fair                 | Child of Thomas Fair                           | U   | 1           | Infant       |                                                                                      | Not Recorded             |
| 274                                                                                                                                                                                                                                                                                                           | 8     | 4   | 47   | Strong               | Child of Martin Strong                         | U   | 2           | Infant       | Dysentery                                                                            | Infectious               |
| 275                                                                                                                                                                                                                                                                                                           | 8     | 4   | 47   | Carter               | James Carter                                   | M   | 18          | Adolescent   | Ship Fever [Typhus]                                                                  | Infectious               |
| 276                                                                                                                                                                                                                                                                                                           | 8     | 14  | 47   | Reynolds             | Timothy Reynolds                               | M   | 14          | Adolescent   | Ship Fever [Typhus]                                                                  | Infectious               |
| 277                                                                                                                                                                                                                                                                                                           | 8     | 15  | 47   | Reynolds             | Ann Reynolds                                   | F   | 52          | Mature Adult | Ship Fever [Typhus]                                                                  | Infectious               |
| 278                                                                                                                                                                                                                                                                                                           | 8     | 20  | 47   | Honan                | Child of Laurena Honan                         | U   | 1.25        | Infant       | Cholera Infantum                                                                     | Infectious               |
| 279                                                                                                                                                                                                                                                                                                           | 8     | 23  | 47   | Ryan                 | George Ryan                                    | M   | 15m         | Infant       | Cholera Infantum                                                                     | Infectious               |
| 280                                                                                                                                                                                                                                                                                                           | 8     | 25  | 47   | Green                | John Green (James son of Patrick & Harriet)    | M   | 6m          | Infant       | Cholera Infantum (August 17, 1848)                                                   | Infectious               |
| 281                                                                                                                                                                                                                                                                                                           | 8     | 31  | 47   | Reynolds             | John Reynolds                                  | M   | 26          | Young Adult  | Phthisis [Tuberculosis]                                                              | Infectious               |
| 282                                                                                                                                                                                                                                                                                                           | 8     | 31  | 47   | McCan                | Mary E. wife of Thomas McCan                   | F   | 42          | Middle Adult | Phthisis [Tuberculosis]                                                              | Infectious               |
| 283                                                                                                                                                                                                                                                                                                           | 9     | 6   | 47   | Bohan                | Son of Patrick Bohan                           | M   | 8m          | Infant       |                                                                                      | Not Recorded             |
| 284                                                                                                                                                                                                                                                                                                           | 10    | 5   | 47   | Shanley              | Child of Patrick Shanley                       | U   | 7m          | Infant       |                                                                                      | Not Recorded             |
| 285                                                                                                                                                                                                                                                                                                           | 10    | 7   | 47   | Reynolds             | Catherine Reynolds                             | F   | 46          | Mature Adult | Ship Fever [Typhus]                                                                  | Infectious               |
| 286                                                                                                                                                                                                                                                                                                           | 10    | 9   | 47   | Flood                | Child of Fd. Flood                             | U   | 4           | Preschool    | Hydrocephalus                                                                        | Other                    |
| 287                                                                                                                                                                                                                                                                                                           | 10    | 9   | 47   | Unknown              | A child                                        | U   | 3m          | Infant       | Colic                                                                                | Other                    |
| 288                                                                                                                                                                                                                                                                                                           | 10    | 17  | 47   | [Fogarty] Facarty    | Widow Mary Facarty (Fogarty)                   | F   | 60          | Mature Adult | Ship Fever [Typhus]                                                                  | Infectious               |
| 289                                                                                                                                                                                                                                                                                                           | 10    | *   | 47   | Unknown              | A child                                        | U   | 4m          | Infant       | Cholera Infantum                                                                     | Infectious               |
| 290                                                                                                                                                                                                                                                                                                           | 11    | 8   | 47   | Early                | Catherine Early                                | F   | 3           | Preschool    | Ship Fever [Typhus]                                                                  | Infectious               |
| 291                                                                                                                                                                                                                                                                                                           | 11    | 30  | 47   | Doyle                | John Doyle                                     | M   | 56          | Mature Adult | Ship Fever [Typhus]                                                                  | Infectious               |
| 292                                                                                                                                                                                                                                                                                                           | 12    | 8   | 47   | Doyle                | Mary Doyle                                     | F   | 54          | Mature Adult | Ship Fever [Typhus]                                                                  | Infectious               |
| 293                                                                                                                                                                                                                                                                                                           | 12    | 11  | 47   | Doyle                | Ellen Doyle                                    | F   | 14          | Adolescent   | Ship Fever [Typhus]                                                                  | Infectious               |
| 294                                                                                                                                                                                                                                                                                                           | 12    | 11  | 47   | Sweetman             | Mary Sweetman                                  | F   | 49          | Mature Adult | Paralysis                                                                            | Other                    |
| 295                                                                                                                                                                                                                                                                                                           | 12    | 13  | 47   | Sheridan             | Son of Patrick Sheridan                        | M   | -           | -            | Volvulus                                                                             | Gastrointestinal         |
| 296                                                                                                                                                                                                                                                                                                           | 12    | 15  | 47   | Brenan               | Laurence Brenan                                | M   | 55          | Mature Adult | Otitis                                                                               | Other                    |
| 297                                                                                                                                                                                                                                                                                                           | 12    | 16  | 47   | Lynch                | Son of Patrick Lynch                           | M   | 3           | Preschool    | Burn                                                                                 | Accident                 |
| 298                                                                                                                                                                                                                                                                                                           | 12    | 16  | 47   | Doyle                | James Doyle                                    | M   | 16          | Adolescent   | Ship Fever [Typhus]                                                                  | Infectious               |
| 299                                                                                                                                                                                                                                                                                                           | 12    | 16  | 47   | Laden                | James Laden                                    | M   | 52          | Mature Adult | Pneumonitis                                                                          | Infectious               |
| 300                                                                                                                                                                                                                                                                                                           | 1     | 8   | 48   | Hanley Kerigan       | Ann Hanley alias Kerigan                       | F   | 44          | Middle Adult | Phthisis [Tuberculosis]                                                              | Infectious               |
| 301                                                                                                                                                                                                                                                                                                           | 1     | 12  | 48   | Kehoe                | Thomas Kehoe                                   | M   | 43          | Middle Adult | Fever (Grave stone: Jan 11, 1848)                                                    | Infectious               |
| 302                                                                                                                                                                                                                                                                                                           | 1     | 16  | 48   | Boyle                | Charles Boyle                                  | M   | 22          | Young Adult  | Dysentery                                                                            | Infectious               |
| 303                                                                                                                                                                                                                                                                                                           | 1     | 24  | 48   | Kennedy              | Thomas Kennedy (Kenedy)                        | M   | 18          | Adolescent   | Fever Typhus                                                                         | Infectious               |
| 304                                                                                                                                                                                                                                                                                                           | 2     | 2   | 48   | Costello             | Mark Costello                                  | M   | 62          | Mature Adult | Colic                                                                                | Other                    |
| 305                                                                                                                                                                                                                                                                                                           | 2     | 8   | 48   | Reynolds             | Wife of Michael Reynolds                       | F   | 35          | Middle Adult | Diarehea                                                                             | Gastrointestinal         |
| 306                                                                                                                                                                                                                                                                                                           | 2     | 14  | 48   | Reynolds             | Patrick Reynolds                               | M   | 35          | Middle Adult | Ship Fever [Typhus]                                                                  | Infectious               |
| 307                                                                                                                                                                                                                                                                                                           | 2     | 17  | 48   | Seeley               | Michael Seeley (Seevy)                         | M   | 67          | Elderly      | Phthisis [Tuberculosis]                                                              | Infectious               |
| 308                                                                                                                                                                                                                                                                                                           | 3     | 2   | 48   | Lavery               | Peter Lavery                                   | M   | 1           | Infant       |                                                                                      | Not Recorded             |
| 309                                                                                                                                                                                                                                                                                                           | 3     | 2   | 48   | Cannon               | Patrick Cannon                                 | M   | 28          | Young Adult  | Ship Fever [Typhus]                                                                  | Infectious               |
| 310                                                                                                                                                                                                                                                                                                           | 3     | 6   | 48   | Malahar              | Peter Malahar (son of Peter & Mary)            | M   | 1.16        | Infant       | Church record (no city record)                                                       | Not Recorded             |
| 311                                                                                                                                                                                                                                                                                                           | 3     | 22  | 48   | Rheel                | Jeremy Rheel                                   | M   | 36          | Middle Adult | Phthisis [Tuberculosis]                                                              | Infectious               |
| 312                                                                                                                                                                                                                                                                                                           | 3     | 31  | 48   | McMahon              | Child of John McMahon                          | U   | 1           | Infant       |                                                                                      | Not Recorded             |
| 313                                                                                                                                                                                                                                                                                                           | 4     | 1   | 48   | Caffey               | Jane Caffey                                    | F   | 68          | Elderly      | Heart Disease of                                                                     | Other                    |
| 314                                                                                                                                                                                                                                                                                                           | 4     | 2   | 48   | Coil                 | Francis Coil                                   | F   | 32          | Middle Adult | Brain Fever                                                                          | Infectious               |
| 315                                                                                                                                                                                                                                                                                                           | 4     | 15  | 48   | McLaughlin           | James McLaughlin                               | M   | 28          | Young Adult  | Ship Fever [Typhus]                                                                  | Infectious               |
| 316                                                                                                                                                                                                                                                                                                           | 4     | 15  | 48   | Teehil               | Child of Terence Teehil                        | U   | 11m         | Infant       |                                                                                      | Not Recorded             |
| 317                                                                                                                                                                                                                                                                                                           | 4     | 15  | 48   | Mulligan             | Child of John Mulligan                         | U   | 5m          | Infant       |                                                                                      | Not Recorded             |
| 318                                                                                                                                                                                                                                                                                                           | 5     | 1   | 48   | Unknown              | Child                                          | U   | 6           | Child        |                                                                                      | Not Recorded             |
| 319                                                                                                                                                                                                                                                                                                           | 5     | 1   | 48   | Daily                | Margaret Daily (Daley [wife of] John)          | F   | 32          | Middle Adult | Puerperal (alt record: May 8, 1848)                                                  | Childbirth               |
| 320                                                                                                                                                                                                                                                                                                           | 5     | 1   | 48   | Gihuly               | Michael Gihuly                                 | M   | 62          | Mature Adult | Fever                                                                                | Infectious               |
| 321                                                                                                                                                                                                                                                                                                           | 5     | 1   | 48   | Reynolds             | Child of John Reynolds                         | U   | 4m          | Infant       |                                                                                      | Not Recorded             |
| 322                                                                                                                                                                                                                                                                                                           | 5     | 10  | 48   | Nephau               | Michael Nephau                                 | M   | 40          | Middle Adult | Porphyrin Hemorrhagia                                                                | Malnutrition             |
| 323                                                                                                                                                                                                                                                                                                           | 5     | 14  | 48   | Brady                | Child of Hugh Brady (Mary A.)                  | U   | 4m          | Infant       | (Alt record: headstone May 10, 1848 - Brady) (see record 328)                        | Not Recorded             |
| 324                                                                                                                                                                                                                                                                                                           | 5     | 14  | 48   | Maglins              | Child of William Maglins                       | U   | 6m          | Infant       |                                                                                      | Not Recorded             |
| 325                                                                                                                                                                                                                                                                                                           | 5     | 20  | 48   | Lyons                | Alexander Lyons                                | M   | 47          | Mature Adult | Icterus                                                                              | Liver Disease/Alcoholism |
| 326                                                                                                                                                                                                                                                                                                           | 6     | 7   | 48   | Hactor               | Wife of John Hactor                            | F   | 22          | Young Adult  | Phthisis [Tuberculosis]                                                              | Infectious               |
| 327                                                                                                                                                                                                                                                                                                           | 6     | 7   | 48   | Fagan                | Joseph Fagan                                   | M   | 36          | Middle Adult | Accident (broken back from a fall)                                                   | Accident                 |
| 328                                                                                                                                                                                                                                                                                                           | 6     | 22  | 48   | Brady                | Hugh Brady                                     | M   | 38          | Middle Adult | Phthisis [Tuberculosis] (see record 172 & 323) (Alt record: headstone June 30, 1848) | Infectious               |
| 329                                                                                                                                                                                                                                                                                                           | 6     | 22  | 48   | Costelo              | Widow Mary Costelo                             | F   | 56          | Mature Adult | Accident (a fall)                                                                    | Accident                 |
| 330                                                                                                                                                                                                                                                                                                           | 6     | 25  | 48   | Ryan                 | Child of William Ryan                          | U   | 1.3         | Infant       |                                                                                      | Not Recorded             |
| 331                                                                                                                                                                                                                                                                                                           | 7     | 6   | 48   | Famgan               | Rose Famgan                                    | F   | 68          | Elderly      | Heart Disease of                                                                     | Other                    |
| 332                                                                                                                                                                                                                                                                                                           | 8     | 4   | 48   | Ryan                 | Catharine Ryan                                 | F   | 36          | Middle Adult | Phthisis [Tuberculosis]                                                              | Infectious               |
| 333                                                                                                                                                                                                                                                                                                           | 8     | 10  | 48   | Colwell              | Rose Colwell                                   | F   | 32          | Middle Adult | Fever                                                                                | Infectious               |
| 334                                                                                                                                                                                                                                                                                                           | 8     | 13  | 48   | Reynolds             | Peter Reynolds                                 | M   | 36          | Middle Adult | Colic                                                                                | Other                    |
| 335                                                                                                                                                                                                                                                                                                           | 8     | 17  | 48   | Sweeny               | William Sweeny                                 | M   | 26          | Young Adult  | Dysentery                                                                            | Infectious               |
| 336                                                                                                                                                                                                                                                                                                           | 8     | 17  | 48   | Kinsella             | Mary Kinsella                                  | F   | 37          | Middle Adult | Fehr Puerperar                                                                       | Childbirth               |
| 337                                                                                                                                                                                                                                                                                                           | 8     | 18  | 48   | Harris               | Henry Harris                                   | M   | 40          | Middle Adult | Drowned                                                                              | Accident                 |
| 338                                                                                                                                                                                                                                                                                                           | 8     | 21  | 48   | Hughes               | Bridget Hughes (Hale Record - Huges)           | F   | 41          | Middle Adult | Dysentery                                                                            | Infectious               |
| 339                                                                                                                                                                                                                                                                                                           | 8     | 26  | 48   | Sullivan             | Mary Sullivan                                  | F   | 5           | Preschool    |                                                                                      | Not Recorded             |
| 340                                                                                                                                                                                                                                                                                                           | 8     | 26  | 48   | Keep                 | John Keep                                      | M   | 29          | Young Adult  | Dysentery                                                                            | Infectious               |
| 341                                                                                                                                                                                                                                                                                                           | 8     | 26  | 48   | McDermott            | Bernard McDermott (son of Michael & Catherine) | M   | 10m         | Infant       | Church record (no city record)                                                       | Not Recorded             |
| 342                                                                                                                                                                                                                                                                                                           | 8     | 27  | 48   | McDermott            | Ann McDermott                                  | F   | 5m          | Infant       | Hydrocephalus                                                                        | Other                    |
| 343                                                                                                                                                                                                                                                                                                           | 8     | 28  | 48   | Spang                | Nicholas W. Spang                              | M   | 1           | Infant       |                                                                                      | Not Recorded             |
| 344                                                                                                                                                                                                                                                                                                           | 9     | 2   | 48   | McEvey               | Thomas McEvey                                  | M   | 36          | Middle Adult |                                                                                      | Not Recorded             |
| 345                                                                                                                                                                                                                                                                                                           | 9     | 3   | 48   | Dignon               | Thomas Dignon (stone: possibly Dickson)        | M   | 30          | Young Adult  | Dysentery                                                                            | Infectious               |
| 346                                                                                                                                                                                                                                                                                                           | 9     | 4   | 48   | Daley                | Patrick Daley                                  | M   | 38          | Middle Adult | Dysentery                                                                            | Infectious               |
| 347                                                                                                                                                                                                                                                                                                           | 9     | 9   | 48   | Clines               | Michael Clines                                 | M   | 23          | Young Adult  | Dysentery                                                                            | Infectious               |
| 348                                                                                                                                                                                                                                                                                                           | 9     | 19  | 48   | Hauser               | Frances Hauser                                 | F   | 26          | Young Adult  | Fever                                                                                | Infectious               |
| 349                                                                                                                                                                                                                                                                                                           | 9     | 27  | 48   | Gordon               | James Gordon                                   | M   | 1           | Infant       | Dysentery                                                                            | Infectious               |
| 350                                                                                                                                                                                                                                                                                                           | 10    | 3   | 48   | Rally                | Cornelius Rally                                | M   | 20          | Young Adult  | Ship Fever [Typhus]                                                                  | Infectious               |
| 351                                                                                                                                                                                                                                                                                                           | 10    | 11  | 48   | Ryan                 | Jane Ryan                                      | F   | 24          | Young Adult  | Phthisis [Tuberculosis]                                                              | Infectious               |
| 352                                                                                                                                                                                                                                                                                                           | 10    | 12  | 48   | McCormick            | Mary McCormick                                 | F   | 21          | Young Adult  | Accident (a fall)                                                                    | Accident                 |
| 353                                                                                                                                                                                                                                                                                                           | 10    | 23  | 48   | Foley                | John Foley                                     | M   | 27          | Young Adult  | Accident on Railroad                                                                 | Accident                 |

| Supplementary Table S1. Chronological data on burials (1834-1851) at Christ's Church St. John's the Evangelist Churches, Davenport Ave. & South St. New Haven, Connecticut. Individuals where trauma is recorded cause of death are in bold. Periods of infectious disease in bold box. See text for details. |       |     |      |                 |                                                 |     |             |              |                                                            |                          |
|---------------------------------------------------------------------------------------------------------------------------------------------------------------------------------------------------------------------------------------------------------------------------------------------------------------|-------|-----|------|-----------------|-------------------------------------------------|-----|-------------|--------------|------------------------------------------------------------|--------------------------|
| Rec.                                                                                                                                                                                                                                                                                                          | Month | Day | Year | Surname         | Name of Person / Non-New Haven origin           | Sex | Age (years) | Age Class    | Recorded cause of death/Notes                              | Recorded Cause of Death  |
| 354                                                                                                                                                                                                                                                                                                           | 10    | 28  | 48   | Sheridan        | Owen Sheridan                                   | M   | 5           | Preschool    | Dysentery                                                  | Infectious               |
| 355                                                                                                                                                                                                                                                                                                           | 11    | 4   | 48   | Corcoran        | William Corcoran                                | M   | 1           | Infant       |                                                            | Not Recorded             |
| 356                                                                                                                                                                                                                                                                                                           | 11    | 5   | 48   | Creed           | Dorothy Creed                                   | F   | 25          | Young Adult  | Fever Typhus (see record 357)                              | Infectious               |
| 357                                                                                                                                                                                                                                                                                                           | 11    | 5   | 48   | Creed           | Dorothy Creed (with) mother Dorothy (headstone) | F   | -           | -            | (see record 356)                                           | Not Recorded             |
| 358                                                                                                                                                                                                                                                                                                           | 11    | 12  | 48   | Galagan         | James Galagan                                   | M   | 40          | Middle Adult | Delirium Tremens                                           | Liver Disease/Alcoholism |
| 359                                                                                                                                                                                                                                                                                                           | 11    | 12  | 48   | Lynn            | Michael Lynn (Lynn)                             | M   | 40          | Middle Adult | Pleuritis (alt record: Grave stone: Nov. 10, 1848)         | Infectious               |
| 360                                                                                                                                                                                                                                                                                                           | 11    | 24  | 48   | Ellis           | Ellen Ellis                                     | F   | 35          | Middle Adult | Phthisis [Tuberculosis]                                    | Infectious               |
| 361                                                                                                                                                                                                                                                                                                           | 11    | 27  | 48   | Costelo         | William Costelo                                 | M   | 45          | Middle Adult | Fever                                                      | Infectious               |
| 362                                                                                                                                                                                                                                                                                                           | 12    | 10  | 48   | Harvey          | Catharine Harvey                                | F   | 25          | Young Adult  | Killed (Homicide)                                          | Violence/Trauma          |
| 363                                                                                                                                                                                                                                                                                                           | 12    | 10  | 48   | Covle           | Bridget Smith Covle                             | F   | 50          | Mature Adult | Phthisis [Tuberculosis]                                    | Infectious               |
| 364                                                                                                                                                                                                                                                                                                           | 12    | 14  | 48   | <b>Kennah</b>   | Thomas Kennah                                   | M   | 28          | Young Adult  | Accident (Railroad)                                        | Accident                 |
| 365                                                                                                                                                                                                                                                                                                           | 1     | 12  | 49   | Fagan           | Bridget Fagan                                   | F   | 19          | Young Adult  | Fever                                                      | Infectious               |
| 366                                                                                                                                                                                                                                                                                                           | 1     | 12  | 49   | Fagan           | Bridget Fagan                                   | F   | 19          | Young Adult  | Fever                                                      | Infectious               |
| 367                                                                                                                                                                                                                                                                                                           | 2     | 2   | 49   | Cavanaugh       | Margaret Cavanaugh (Kavanaugh)                  | F   | 27          | Young Adult  | Scarlatina (alt record: 2/1/1849) (see record 264)         | Infectious               |
| 368                                                                                                                                                                                                                                                                                                           | 2     | 11  | 49   | Scully          | John Scully                                     | M   | 30          | Young Adult  | Fever                                                      | Infectious               |
| 369                                                                                                                                                                                                                                                                                                           | 2     | 11  | 49   | Hayes           | Child of John Hayes                             | U   | -           | -            |                                                            | Not Recorded             |
| 370                                                                                                                                                                                                                                                                                                           | 2     | 11  | 49   | McMullen        | Child of Patrick McMullen                       | U   | 9m          | Infant       | Dysentery                                                  | Infectious               |
| 371                                                                                                                                                                                                                                                                                                           | 2     | 20  | 49   | <b>Moran</b>    | Thomas Moran                                    | M   | 29          | Young Adult  | Accident - Fall from a tree                                | Accident                 |
| 372                                                                                                                                                                                                                                                                                                           | 2     | 23  | 49   | Unknown         | a Child                                         | U   | -           | -            | Whooping Cough                                             | Infectious               |
| 373                                                                                                                                                                                                                                                                                                           | 3     | 4   | 49   | Faughran        | Edward Faughran                                 | M   | 4.5         | Preschool    |                                                            | Not Recorded             |
| 374                                                                                                                                                                                                                                                                                                           | 3     | 4   | 49   | McNally         | Bridget McNally                                 | F   | 52          | Mature Adult |                                                            | Not Recorded             |
| 375                                                                                                                                                                                                                                                                                                           | 3     | 6   | 49   | Mooney          | Thomas H. Mooney (son of Morgan & Jane T.)      | M   | 1.12        | Infant       | Church record (no city record)                             | Not Recorded             |
| 376                                                                                                                                                                                                                                                                                                           | 3     | 6   | 49   | <b>Bohan</b>    | Charles Bohan                                   | M   | 30          | Young Adult  | Phthisis [Tuberculosis]                                    | Infectious               |
| 377                                                                                                                                                                                                                                                                                                           | 3     | 9   | 49   | Rochie          | James Rochie                                    | M   | 60          | Mature Adult | Fever                                                      | Infectious               |
| 378                                                                                                                                                                                                                                                                                                           | 3     | 18  | 49   | Coggins         | Esther Coggins                                  | F   | 27          | Young Adult  | Fever                                                      | Infectious               |
| 379                                                                                                                                                                                                                                                                                                           | 3     | 18  | 49   | Weir            | James Weir                                      | M   | 28          | Young Adult  | Fever                                                      | Infectious               |
| 380                                                                                                                                                                                                                                                                                                           | 3     | 25  | 49   | Callighan       | Eliza Callighan                                 | F   | 40          | Middle Adult | Phthisis [Tuberculosis]                                    | Infectious               |
| 381                                                                                                                                                                                                                                                                                                           | 3     | 29  | 49   | Cox             | Ann Cox                                         | F   | 60          | Mature Adult | Decline, Marasmus?                                         | Malnutrition             |
| 382                                                                                                                                                                                                                                                                                                           | 4     | 2   | 49   | <b>Bohan</b>    | Margaret Bohan                                  | F   | 30          | Young Adult  | Childbed                                                   | Childbirth               |
| 383                                                                                                                                                                                                                                                                                                           | 4     | 6   | 49   | <b>Bohan</b>    | Thomas Bohan                                    | M   | 19          | Young Adult  | Accident - Fracture                                        | Accident                 |
| 384                                                                                                                                                                                                                                                                                                           | 4     | 16  | 49   | Kennedy         | Michael Kennedy                                 | M   | 26          | Young Adult  | Phthisis [Tuberculosis]                                    | Infectious               |
| 385                                                                                                                                                                                                                                                                                                           | 4     | 16  | 49   | Herrick         | Elizabeth Herrick                               | F   | 65          | Mature Adult | Fever                                                      | Infectious               |
| 386                                                                                                                                                                                                                                                                                                           | 4     | 21  | 49   | Connor          | Michael Connor                                  | M   | 26          | Young Adult  | Church record (no city record)                             | Not Recorded             |
| 387                                                                                                                                                                                                                                                                                                           | 5     | 11  | 49   | Murphy          | Catharine Murphy                                | F   | 4m          | Infant       |                                                            | Not Recorded             |
| 388                                                                                                                                                                                                                                                                                                           | 5     | 15  | 49   | Camason         | Mark Camason                                    | F   | 23          | Young Adult  | Dropsy                                                     | Other                    |
| 389                                                                                                                                                                                                                                                                                                           | 5     | 23  | 49   | McGuire         | James McGuire                                   | M   | 1.5         | Infant       | Fever                                                      | Infectious               |
| 390                                                                                                                                                                                                                                                                                                           | 6     | 15  | 49   | Cassidy         | Eliza Cassidy                                   | F   | -           | -            | Phthisis                                                   | Infectious               |
| 391                                                                                                                                                                                                                                                                                                           | 6     | 22  | 49   | Dougherty       | Martin Dougherty (Dougherty)                    | M   | 34          | Middle Adult | Phthisis [Tuberculosis]                                    | Infectious               |
| 392                                                                                                                                                                                                                                                                                                           | 7     | 9   | 49   | Walsh           | Robert Walsh                                    | M   | 7           | Child        | Dysentery                                                  | Infectious               |
| 393                                                                                                                                                                                                                                                                                                           | 7     | 10  | 49   | Connor          | Mary Connor (wife of Patrick)                   | F   | 38          | Middle Adult | Church record (no city record) (see record 578)            | Not Recorded             |
| 394                                                                                                                                                                                                                                                                                                           | 7     | 21  | 49   | Connelly        | Anne Connelly                                   | F   | 33          | Middle Adult | Phthisis [Tuberculosis]                                    | Infectious               |
| 395                                                                                                                                                                                                                                                                                                           | 7     | 25  | 49   | O'Bryan         | James O'Bryan                                   | M   | 5           | Preschool    | Dysentery                                                  | Infectious               |
| 396                                                                                                                                                                                                                                                                                                           | 8     | 6   | 49   | Philbrick       | Michael Philbrick                               | M   | 22          | Young Adult  | Drowned                                                    | Accident                 |
| 397                                                                                                                                                                                                                                                                                                           | 8     | 8   | 49   | Reilly          | John Reilly                                     | M   | 1m          | Infant       |                                                            | Not Recorded             |
| 398                                                                                                                                                                                                                                                                                                           | 8     | 10  | 49   | Magrath         | Ellen Magrath                                   | F   | 1           | Infant       | Dysentery                                                  | Infectious               |
| 399                                                                                                                                                                                                                                                                                                           | 8     | 12  | 49   | Stiney          | Richard Stiney                                  | M   | -           | -            | Hydrocephalus                                              | Other                    |
| 400                                                                                                                                                                                                                                                                                                           | 8     | 14  | 49   | Hayes           | William Hayes                                   | M   | 1.1         | Infant       | Convulsions                                                | Other                    |
| 401                                                                                                                                                                                                                                                                                                           | 8     | 17  | 49   | McDonough       | Michael McDonough                               | M   | -           | -            |                                                            | Not Recorded             |
| 402                                                                                                                                                                                                                                                                                                           | 8     | 19  | 49   | Reilly          | John Reilly                                     | M   | 1.5         | Infant       | Cholera Infantum                                           | Infectious               |
| 403                                                                                                                                                                                                                                                                                                           | 8     | 22  | 49   | Costello        | Michael Costello                                | M   | 35          | Middle Adult | Cholera                                                    | Infectious               |
| 404                                                                                                                                                                                                                                                                                                           | 8     | 24  | 49   | Brady           | Mrs. Brady                                      | F   | -           | -            | Delirium Tremens                                           | Liver Disease/Alcoholism |
| 405                                                                                                                                                                                                                                                                                                           | 8     | 27  | 49   | Mason           | John Reilly Mason                               | M   | 1           | Infant       | Convulsions                                                | Other                    |
| 406                                                                                                                                                                                                                                                                                                           | 8     | 27  | 49   | Shanley         | Bernard Shanley                                 | M   | 22          | Young Adult  | Phthisis [Tuberculosis]                                    | Infectious               |
| 407                                                                                                                                                                                                                                                                                                           | 8     | 27  | 49   | Bon/Dunn        | Mrs. Bon (or Dunn)                              | F   | -           | -            | Cholera                                                    | Infectious               |
| 408                                                                                                                                                                                                                                                                                                           | 8     | 27  | 49   | McCormick       | Thomas McCormick                                | M   | 8m          | Infant       |                                                            | Not Recorded             |
| 409                                                                                                                                                                                                                                                                                                           | 9     | 1   | 49   | Carroll         | Mary Carroll                                    | F   | 2.5         | Infant       | Dysentery & Convulsions                                    | Infectious               |
| 410                                                                                                                                                                                                                                                                                                           | 9     | 2   | 49   | Dunne           | Eliza Dunne                                     | F   | 70          | Elderly      | Cholera                                                    | Infectious               |
| 411                                                                                                                                                                                                                                                                                                           | 9     | 3   | 49   | Brougham        | John Brougham                                   | M   | 30          | Young Adult  | Dysentery                                                  | Infectious               |
| 412                                                                                                                                                                                                                                                                                                           | 9     | 7   | 49   | Blessing        | Peter Blessing                                  | M   | 32          | Middle Adult | Cholera                                                    | Infectious               |
| 413                                                                                                                                                                                                                                                                                                           | 9     | 10  | 49   | Taylor          | Catharine Taylor                                | F   | 26          | Young Adult  | Dysentery                                                  | Infectious               |
| 414                                                                                                                                                                                                                                                                                                           | 9     | 13  | 49   | Collins         | James Collins                                   | M   | 1           | Infant       | Dysentery                                                  | Infectious               |
| 415                                                                                                                                                                                                                                                                                                           | 9     | 16  | 49   | Gaynor          | Mary Gaynor                                     | F   | 1.5         | Infant       | Dysentery                                                  | Infectious               |
| 416                                                                                                                                                                                                                                                                                                           | 9     | 14  | 49   | Holcomb         | Mary Holcomb                                    | F   | 32          | Middle Adult | Dysentery                                                  | Infectious               |
| 417                                                                                                                                                                                                                                                                                                           | 9     | 19  | 49   | Donnegan        | Patrick Donnegan                                | M   | 28          | Young Adult  | Cancer                                                     | Other                    |
| 418                                                                                                                                                                                                                                                                                                           | 9     | 30  | 49   | Hurley          | Margaret Hurley                                 | F   | 30          | Young Adult  | Dysentery                                                  | Infectious               |
| 419                                                                                                                                                                                                                                                                                                           | 9     | 30  | 49   | Flynn           | Michael Flynn                                   | M   | 35          | Middle Adult | Dysentery                                                  | Infectious               |
| 420                                                                                                                                                                                                                                                                                                           | 10    | 4   | 49   | Gaffney         | Thomas Gaffney                                  | M   | 7m          | Infant       | Dysentery                                                  | Infectious               |
| 421                                                                                                                                                                                                                                                                                                           | 10    | 5   | 49   | Flynn           | Michael Flynn                                   | M   | 37          | Middle Adult | Dysentery                                                  | Infectious               |
| 422                                                                                                                                                                                                                                                                                                           | 10    | 6   | 49   | Turbutt         | William Turbutt                                 | M   | 40          | Middle Adult | Dysentery                                                  | Infectious               |
| 423                                                                                                                                                                                                                                                                                                           | 10    | 10  | 49   | Martin          | James Martin                                    | M   | 35          | Middle Adult | Dysentery                                                  | Infectious               |
| 424                                                                                                                                                                                                                                                                                                           | 10    | 18  | 49   | Reynolds        | John Reynolds                                   | M   | 20          | Young Adult  | Fever, Typhus (alt record: Oct. 17, 1849)                  | Infectious               |
| 425                                                                                                                                                                                                                                                                                                           | 10    | 19  | 49   | Reilly          | John Reilly                                     | M   | 26          | Young Adult  | Dysentery                                                  | Infectious               |
| 426                                                                                                                                                                                                                                                                                                           | 10    | 26  | 49   | Hayes           | Peter Hayes                                     | M   | 23          | Young Adult  | Dysentery                                                  | Infectious               |
| 427                                                                                                                                                                                                                                                                                                           | 10    | 29  | 49   | McGreedy        | Mary McGreedy                                   | F   | 23          | Young Adult  | Puerperal Convulsions                                      | Childbirth               |
| 428                                                                                                                                                                                                                                                                                                           | 11    | 11  | 49   | Murray          | Bridget Murray                                  | F   | 58          | Mature Adult | Phthisis [Tuberculosis]                                    | Infectious               |
| 429                                                                                                                                                                                                                                                                                                           | 11    | 20  | 49   | Reilly          | Catherine Reilly                                | F   | 24          | Young Adult  | Fever                                                      | Infectious               |
| 430                                                                                                                                                                                                                                                                                                           | 11    | 28  | 49   | Costello        | William Costello                                | M   | 46          | Mature Adult | Church record (no city record) (see record 439)            | Not Recorded             |
| 431                                                                                                                                                                                                                                                                                                           | 12    | 5   | 49   | Klem            | Mary C. Klem (wife of George J.)                | F   | 32          | Middle Adult | Phthisis [Tuberculosis] (alt record: Dec. 4, 1849)         | Infectious               |
| 432                                                                                                                                                                                                                                                                                                           | 12    | 12  | 49   | Toole           | Ellen Toole                                     | F   | 26          | Young Adult  | Fever                                                      | Infectious               |
| 433                                                                                                                                                                                                                                                                                                           | 12    | 26  | 49   | Kalahan         | Catharine Kalahan                               | F   | 23          | Young Adult  | Dysentery                                                  | Infectious               |
| 434                                                                                                                                                                                                                                                                                                           | 12    | 26  | 49   | Gaynor          | Walter Gaynor                                   | M   | 75          | Elderly      | Dysentery                                                  | Infectious               |
| 435                                                                                                                                                                                                                                                                                                           | 1     | 10  | 50   | Cogan           | Margaret Cogan                                  | F   | 22          | Young Adult  | Puerperal Fever                                            | Childbirth               |
| 436                                                                                                                                                                                                                                                                                                           | 1     | 30  | 50   | McSweeney       | William McSweeney                               | M   | 1           | Infant       | Dysentery                                                  | Infectious               |
| 437                                                                                                                                                                                                                                                                                                           | 2     | 21  | 50   | Sweeney         | Onora Sweeney                                   | F   | 68          | Elderly      | Consumption [Tuberculosis]                                 | Infectious               |
| 438                                                                                                                                                                                                                                                                                                           | 2     | 22  | 50   | Leary           | Daniel Leary                                    | M   | 48          | Mature Adult | Consumption [Tuberculosis]                                 | Infectious               |
| 439                                                                                                                                                                                                                                                                                                           | 3     | 1   | 50   | Costello        | Ellen Costello (Elena wife of William)          | F   | 52          | Mature Adult | Phthisis [Tuberculosis] (March 10, 1850) (see record 430)  | Infectious               |
| 440                                                                                                                                                                                                                                                                                                           | 3     | 7   | 50   | Sillwood        | John Sillwood                                   | M   | -           | -            | Asphyxia                                                   | Other                    |
| 441                                                                                                                                                                                                                                                                                                           | 3     | 8   | 50   | Feelan          | John Feelan                                     | M   | 12d         | Infant       |                                                            | Not Recorded             |
| 442                                                                                                                                                                                                                                                                                                           | 3     | 12  | 50   | Welch           | Morice Welch                                    | M   | 27          | Young Adult  | Pneumonia                                                  | Infectious               |
| 443                                                                                                                                                                                                                                                                                                           | 3     | 14  | 50   | Blake           | Elizabeth Blake                                 | F   | 27          | Young Adult  | Childbirth                                                 | Childbirth               |
| 444                                                                                                                                                                                                                                                                                                           | 3     | 23  | 50   | Daily           | John Daily                                      | M   | 8m          | Infant       | unknown                                                    | Not Recorded             |
| 445                                                                                                                                                                                                                                                                                                           | 4     | 1   | 50   | Duffee          | Ann Duffee                                      | F   | 9           | Child        | Dysentery                                                  | Infectious               |
| 446                                                                                                                                                                                                                                                                                                           | 4     | 11  | 50   | Tavla           | Michael Tavla                                   | M   | 15d         | Infant       | Hydraccephalus                                             | Other                    |
| 447                                                                                                                                                                                                                                                                                                           | 4     | 18  | 50   | Logan           | Susan Logan                                     | F   | 42          | Middle Adult | Volulus [?]                                                | Gastrointestinal         |
| 448                                                                                                                                                                                                                                                                                                           | 4     | 22  | 50   | Shields         | Randall Shields                                 | M   | 8           | Child        | Hydraccephalus                                             | Other                    |
| 449                                                                                                                                                                                                                                                                                                           | 4     | 26  | 50   | Fitzpatrick     | Bridget FitzPatrick                             | F   | 26          | Young Adult  | Consumption [Tuberculosis]                                 | Infectious               |
| 450                                                                                                                                                                                                                                                                                                           | 4     | 27  | 50   | Magoveran       | B. Magoveran                                    | U   | 26          | Young Adult  | Church record (no city record)                             | Not Recorded             |
| 451                                                                                                                                                                                                                                                                                                           | 5     | 2   | 50   | Leonard         | Child of James Leonard                          | U   | 0           | Infant       | Stillborn                                                  | Other                    |
| 452                                                                                                                                                                                                                                                                                                           | 5     | 13  | 50   | Marygan         | Ann Marygan                                     | F   | 5           | Preschool    | unknown perhaps Ships Fever                                | Not Recorded             |
| 453                                                                                                                                                                                                                                                                                                           | 5     | 21  | 50   | McGrath         | Daniel McGrath                                  | F   | 5           | Preschool    | Railroad accident                                          | Accident                 |
| 454                                                                                                                                                                                                                                                                                                           | 5     | 27  | 50   | Stanford        | Thomas Stanford                                 | M   | 5           | Preschool    | Pneumonitis                                                | Infectious               |
| 455                                                                                                                                                                                                                                                                                                           | 5     | 30  | 50   | Johnson         | James Johnson                                   | M   | 1m          | Infant       | Manasium                                                   | Malnutrition             |
| 456                                                                                                                                                                                                                                                                                                           | 5     | 31  | 50   | Galigan         | Catharine Galigan                               | F   | 22          | Young Adult  | Phthisis [Tuberculosis] (alt record: Galligan May 28 1850) | Infectious               |
| 457                                                                                                                                                                                                                                                                                                           | 6     | 3   | 50   | Marrigen        | Catherine Marrigen                              | F   | 1           | Infant       | Ship Fever [Typhus]                                        | Infectious               |
| 458                                                                                                                                                                                                                                                                                                           | 6     | 20  | 50   | Peterson        | Wilbro Paul Peterson                            | M   | 3           | Preschool    | Manasium                                                   | Malnutrition             |
| 459                                                                                                                                                                                                                                                                                                           | 6     | 27  | 50   | Carroll         | James son of Patrick Carroll                    | M   | 21d         | Infant       | Convulsions, Police Off. Child                             | Other                    |
| 460                                                                                                                                                                                                                                                                                                           | 7     | 4   | 50   | <b>Welch</b>    | Honora Welch                                    | F   | 10          | Child        | Accident - Discharge of Cannon                             | Accident                 |
| 461                                                                                                                                                                                                                                                                                                           | 7     | 13  | 50   | Clancey         | Son of James Clancey                            | M   | 0           | Infant       | Stillborn                                                  | Other                    |
| 462                                                                                                                                                                                                                                                                                                           | 7     | 16  | 50   | O'Neil          | Mary O'Neil                                     | F   | 42          | Middle Adult | Dropsy                                                     | Other                    |
| 463                                                                                                                                                                                                                                                                                                           | 7     | 25  | 50   | Larry           | Bridget Larry                                   | F   | 22          | Young Adult  | Typhoid Fever                                              | Infectious               |
| 464                                                                                                                                                                                                                                                                                                           | 7     | 25  | 50   | Arthur          | James Arthur                                    | M   | 24          | Young Adult  | Consumption [Tuberculosis]                                 | Infectious               |
| 465                                                                                                                                                                                                                                                                                                           | 7     | 29  | 50   | <b>Costello</b> | Thomas Costello                                 | M   | 19          | Young Adult  | Accident - fall from a scaffold                            | Accident                 |
| 466                                                                                                                                                                                                                                                                                                           | 8     | 1   | 50   | Keep            | Daniel Keep (from Northford)                    | M   | 5m          | Infant       | Catarrh (fever & teething)                                 | Infectious               |
| 467                                                                                                                                                                                                                                                                                                           | 8     | 2   | 50   | Lachy           | Ellen, Child of John Lachy                      | F   | 11m         | Infant       | Cholera Infantum                                           | Infectious               |
| 468                                                                                                                                                                                                                                                                                                           | 8     | 4   | 50   | Bruin           | Michael Bruin                                   | M   | -           | -            | Phthisis                                                   | Infectious               |
| 469                                                                                                                                                                                                                                                                                                           | 8     | 4   | 50   | Milan           | Thomas Milan                                    | M   | -           | -            | Phthisis                                                   | Infectious               |
| 470                                                                                                                                                                                                                                                                                                           | 8     | 7   | 50   | McLaughlin      | James McLaughlin                                | M   | 2m          | Infant       | Cholera Infantum                                           | Infectious               |

| Supplementary Table S1. Chronological data on burials (1834-1851) at Christ's Church St. John's the Evangelist Churches, Davenport Ave. & South St. New Haven, Connecticut. Individuals where trauma is recorded cause of death are in bold. Periods of infectious disease in bold box. See text for details. |       |     |          |            |                                                        |     |             |              |                                         |                          |
|---------------------------------------------------------------------------------------------------------------------------------------------------------------------------------------------------------------------------------------------------------------------------------------------------------------|-------|-----|----------|------------|--------------------------------------------------------|-----|-------------|--------------|-----------------------------------------|--------------------------|
| Rec.                                                                                                                                                                                                                                                                                                          | Month | Day | Year     | Surname    | Name of Person / Non-New Haven origin                  | Sex | Age (years) | Age Class    | Recorded cause of death/Notes           | Recorded Cause of Death  |
| 471                                                                                                                                                                                                                                                                                                           | 8     | 11  | 50       | Bohan      | Thomas Bohan                                           | M   | 5m          | Infant       | Cholera Infantum                        | Infectious               |
| 472                                                                                                                                                                                                                                                                                                           | 8     | 12  | 50       | Dermody    | Lenora Dermody                                         | F   | 36          | Middle Adult | Inflammation of the Bowels              | Gastrointestinal         |
| 473                                                                                                                                                                                                                                                                                                           | 8     | 13  | 50       | McLaughlin | Eliza J. McLaughlin (daughter of) Michael & Rosanna)   | F   | 8.25        | Child        | Hemorrhagia                             | Bleeding                 |
| 474                                                                                                                                                                                                                                                                                                           | 8     | 14  | 50       | Cunningham | Andrew Cunningham                                      | M   | 3m          | Infant       | Manasius & Diarrhea                     | Malnutrition             |
| 475                                                                                                                                                                                                                                                                                                           | 8     | 20  | 50       | Malcoo     | Child of Edmund Malcoo                                 | U   | 0           | Infant       | Stillborn                               | Other                    |
| 476                                                                                                                                                                                                                                                                                                           | 8     | 27  | 50       | Mvnehan    | Mary Mvnehan                                           | F   | 2.17        | Infant       | Convulsions                             | Other                    |
| 477                                                                                                                                                                                                                                                                                                           | 8     | 31  | 50       | Stanford   | Margaret Stanford                                      | F   | 1.12        | Infant       | Cholera                                 | Infectious               |
| 478                                                                                                                                                                                                                                                                                                           | 8     | 31  | 50       | McDermott  | Bridget McDermott                                      | F   | 1.17        | Infant       | Cough or Teething                       | Infectious               |
| 479                                                                                                                                                                                                                                                                                                           | 9     | 3   | 50       | Cassidy    | Philip Cassidy                                         | M   | 16          | Adolescent   | Liver Disease                           | Liver Disease/Alcoholism |
| 480                                                                                                                                                                                                                                                                                                           | 9     | 5   | 50       | Flaherty   | Mary Flaherty (daughter of) Patrick & Bridget          | F   | 17          | Adolescent   | Phthisis (alt record: 9/3/1850)         | Infectious               |
| 481                                                                                                                                                                                                                                                                                                           | 9     | 13  | 50       | Murtagh    | Mary Jane Murtagh                                      | F   | 10m         | Infant       | Cholera                                 | Infectious               |
| 482                                                                                                                                                                                                                                                                                                           | 9     | 15  | 50       | Comasky    | Bernard Comasky                                        | M   | 1           | Infant       | Hydrocephalus                           | Other                    |
| 483                                                                                                                                                                                                                                                                                                           | 9     | 15  | 50       | Reilly     | John Reilly                                            | M   | 1           | Infant       | Dysentery                               | Infectious               |
| 484                                                                                                                                                                                                                                                                                                           | 9     | 17  | 50       | Egan       | Catherine Egan                                         | F   | 1           | Infant       | Hydrocephalus                           | Other                    |
| 485                                                                                                                                                                                                                                                                                                           | 9     | 18  | 50       | Cassada    | Francis Henry Cassada                                  | M   | 1           | Infant       | Peritonal Inflammation                  | Infectious               |
| 486                                                                                                                                                                                                                                                                                                           | 9     | 18  | 50       | Reynolds   | Mrs. Reynolds (wife of James)                          | F   | 35          | Middle Adult | Chronic Debility                        | Other                    |
| 487                                                                                                                                                                                                                                                                                                           | 9     | 18  | 50       | Galagher   | James Galagher                                         | M   | 48          | Mature Adult | Paralysis                               | Other                    |
| 488                                                                                                                                                                                                                                                                                                           | 9     | 22  | 50       | Gilen      | Bridget Gillen (wife of) James Gillen                  | F   | 53          | Mature Adult | Abscess Lumbar (alt. record: 9/14/1850) | Other                    |
| 489                                                                                                                                                                                                                                                                                                           | 10    | 2   | 50       | McCaffray  | James McCaffray                                        | M   | 34          | Middle Adult | Executed by Hanging, New Haven Jail     | Execution                |
| 490                                                                                                                                                                                                                                                                                                           | 10    | 6   | 50       | Reynolds   | Bridget Reynolds                                       | F   | 83          | Elderly      | Old age                                 | Other                    |
| 491                                                                                                                                                                                                                                                                                                           | 10    | 16  | 50       | Kivlahern  | John Kivlahern                                         | M   | 1           | Infant       | Hydrocephalus                           | Other                    |
| 492                                                                                                                                                                                                                                                                                                           | 10    | 17  | 50       | Reynolds   | Terese Bohan (daughter of) Bernard Reynolds            | F   | 1           | Infant       | Infantile                               | Not Recorded             |
| 493                                                                                                                                                                                                                                                                                                           | 10    | 27  | 50       | Stang      | Martin Stang Jr.                                       | M   | 2           | Infant       | Diarrhea                                | gastrointestinal         |
| 494                                                                                                                                                                                                                                                                                                           | 11    | 6   | 50       | Farrell    | Patrick Farrell                                        | M   | 30          | Young Adult  | Dropsy                                  | Other                    |
| 495                                                                                                                                                                                                                                                                                                           | 11    | 25  | 50       | McDermott  | Patrick McDermott                                      | M   | 26          | Young Adult  | Consumption [Tuberculosis]              | Infectious               |
| 496                                                                                                                                                                                                                                                                                                           | 12    | 5   | 50       | Bowen      | Charles Bowen                                          | M   | 66          | Elderly      | Church record (no city record)          | Not Recorded             |
| 497                                                                                                                                                                                                                                                                                                           | 12    | 11  | 50       | Faughnan   | Michael Faughnan                                       | M   | 17          | Adolescent   | Phthisis                                | Infectious               |
| 498                                                                                                                                                                                                                                                                                                           | 12    | 17  | 50       | Naughton   | Mary Naughton                                          | F   | 5           | Preschool    | Bronchitis                              | Infectious               |
| 499                                                                                                                                                                                                                                                                                                           | 12    | 17  | 50       | Crowly     | Timothy Crowly                                         | M   | 17          | Adolescent   | Phthisis                                | Infectious               |
| 500                                                                                                                                                                                                                                                                                                           | 1     | 2   | 51       | Kennedy    | Homora Kennedy                                         | F   | 35          | Middle Adult | Liver Disease                           | Liver Disease/Alcoholism |
| 501                                                                                                                                                                                                                                                                                                           | 1     | 5   | 51       | McGovern   | Mary McGovern                                          | F   | 44          | Middle Adult | Puerperal Fever                         | Childbirth               |
| 502                                                                                                                                                                                                                                                                                                           | 1     | 13  | 51       | Shanley    | Bridget Shanley                                        | F   | 36          | Middle Adult | Uterine Hemorage                        | Childbirth               |
| 503                                                                                                                                                                                                                                                                                                           | 1     | 14  | 51       | Bowen      | Margaet Bowen                                          | F   | 28          | Young Adult  | Phthisis [Tuberculosis]                 | Infectious               |
| 504                                                                                                                                                                                                                                                                                                           | 1     | 14  | 51       | McGuire    | Barney McGuire                                         | M   | 60          | Mature Adult | Intemperance                            | Alcoholism               |
| 505                                                                                                                                                                                                                                                                                                           | 2     | 15  | 51       | Bohan      | Terese Bohan (daughter of) Teres & Ann)                | F   | 1           | Infant       | Church record (no city record)          | Not Recorded             |
| 506                                                                                                                                                                                                                                                                                                           | 2     | 21  | 51       | Neil       | Catherine Neil                                         | F   | 23          | Young Adult  |                                         | Not Recorded             |
| 507                                                                                                                                                                                                                                                                                                           | 2     | 21  | 51       | Roarke     | P. Roarke                                              | M   | 10m         | Infant       |                                         | Not Recorded             |
| 508                                                                                                                                                                                                                                                                                                           | 2     | 24  | 51       | McGrath    | M. McGrath                                             | M   | 35          | Middle Adult |                                         | Not Recorded             |
| 509                                                                                                                                                                                                                                                                                                           | 2     | 24  | 51       | White      | John R. White                                          | M   | 5m          | Infant       |                                         | Not Recorded             |
| 510                                                                                                                                                                                                                                                                                                           | 2     | 27  | 51       | Healy      | Margaret Healy                                         | F   | 10          | Child        |                                         | Not Recorded             |
| 511                                                                                                                                                                                                                                                                                                           | 2     | 27  | 51       | Jollivan   | Patrick Jollivan                                       | M   | 23          | Young Adult  |                                         | Not Recorded             |
| 512                                                                                                                                                                                                                                                                                                           | 2     | 28  | 51       | Gorman     | James Gorman                                           | M   | 7m          | Infant       |                                         | Not Recorded             |
| 513                                                                                                                                                                                                                                                                                                           | 3     | 2   | 51       | Brady      | Bernard Brady                                          | M   | 50          | Mature Adult |                                         | Not Recorded             |
| 514                                                                                                                                                                                                                                                                                                           | 3     | 5   | 51       | Bryan      | James Bryan                                            | M   | 1           | Infant       |                                         | Not Recorded             |
| 515                                                                                                                                                                                                                                                                                                           | 3     | 5   | 51       | Lynch      | Michael Lynch                                          | M   | 1           | Infant       |                                         | Not Recorded             |
| 516                                                                                                                                                                                                                                                                                                           | 3     | 5   | 51       | Colman     | John Colman                                            | M   | 1           | Infant       |                                         | Not Recorded             |
| 517                                                                                                                                                                                                                                                                                                           | 3     | 7   | 51       | Flaherty   | Mary Ann Flaherty                                      | F   | 8           | Child        |                                         | Not Recorded             |
| 518                                                                                                                                                                                                                                                                                                           | 3     | 7   | 51       | Kennedy    | John Kennedy                                           | M   | 28          | Young Adult  | Fever                                   | Infectious               |
| 519                                                                                                                                                                                                                                                                                                           | 3     | 7   | 51       | Hogan      | Michael Hogan                                          | M   | 55          | Mature Adult |                                         | Not Recorded             |
| 520                                                                                                                                                                                                                                                                                                           | 3     | 14  | 51       | Peterson   | Rosanna Peterson                                       | F   | 1           | Infant       |                                         | Not Recorded             |
| 521                                                                                                                                                                                                                                                                                                           | 3     | 18  | 51       | Whelen     | Edward Whelen                                          | M   | 1           | Infant       | Convulsions                             | Other                    |
| 522                                                                                                                                                                                                                                                                                                           | 3     | 20  | 51       | Sweeney    | George Sweeney                                         | M   | 2d          | Infant       |                                         | Not Recorded             |
| 523                                                                                                                                                                                                                                                                                                           | 3     | 27  | 51       | Walsh      | Mary Walsh                                             | F   | 42          | Middle Adult | Phthisis [Tuberculosis]                 | Infectious               |
| 524                                                                                                                                                                                                                                                                                                           | 3     | 28  | 51       | Sullivan   | Andrew Sullivan                                        | M   | 40          | Middle Adult |                                         | Not Recorded             |
| 525                                                                                                                                                                                                                                                                                                           | 3     | 31  | 51       | Keefe      | John Keefe                                             | M   | 18          | Adolescent   | Ship Fever [Typhus]                     | Infectious               |
| 526                                                                                                                                                                                                                                                                                                           | 3     | 31  | 51       | Nowland    | Richard Nowland                                        | M   | 1d          | Infant       |                                         | Not Recorded             |
| 527                                                                                                                                                                                                                                                                                                           | 4     | 1   | 51       | Healy      | Ann Healy                                              | F   | 5           | Preschool    | Ship Fever [Typhus]                     | Infectious               |
| 528                                                                                                                                                                                                                                                                                                           | 4     | 6   | 51       | Smith      | John Smith                                             | M   | 50          | Mature Adult | Fever                                   | Infectious               |
| 529                                                                                                                                                                                                                                                                                                           | 4     | 19  | 51       | McDonough  | Michael McDonough                                      | M   | 1           | Infant       |                                         | Not Recorded             |
| 530                                                                                                                                                                                                                                                                                                           | 4     | 25  | 51       | Grooms     | Ellen Grooms                                           | F   | 32          | Middle Adult | Phthisis [Tuberculosis]                 | Infectious               |
| 531                                                                                                                                                                                                                                                                                                           | 5     | 1   | 51       | Hackett    | Sarah Hackett                                          | F   | 17          | Adolescent   | Ship Fever [Typhus]                     | Infectious               |
| 532                                                                                                                                                                                                                                                                                                           | 5     | 11  | 51       | Galligan   | Andrew Galligan                                        | M   | 45          | Middle Adult | Typhoid Fever                           | Infectious               |
| 533                                                                                                                                                                                                                                                                                                           | 6     | 10  | 51       | Riley      | Mary Riley                                             | F   | 67          | Elderly      | Disease of Liver                        | Liver Disease/Alcoholism |
| 534                                                                                                                                                                                                                                                                                                           | 6     | 13  | 51       | Judge      | Mary Judge                                             | F   | 1           | Infant       | Convulsions                             | Other                    |
| 535                                                                                                                                                                                                                                                                                                           | 6     | 16  | 51       | Fanny      | Catherine Fanny                                        | F   | 1           | Infant       | Bron. Measles                           | Infectious               |
| 536                                                                                                                                                                                                                                                                                                           | 6     | 18  | 51       | Field      | Child of John Field                                    | U   | 14d         | Infant       | Convulsions                             | Other                    |
| 537                                                                                                                                                                                                                                                                                                           | 6     | 20  | 51       | Walsh      | Child of Patrick Walsh                                 | U   | -           | -            | Croup                                   | Infectious               |
| 538                                                                                                                                                                                                                                                                                                           | 6     | 21  | 51       | Toole      | Mary Toole                                             | F   | 7m          | Infant       | Bron. Measles                           | Infectious               |
| 539                                                                                                                                                                                                                                                                                                           | 6     | 23  | 51       | Conlan     | Thomas Conlan                                          | M   | 4m          | Infant       | Hydrocephalus                           | Other                    |
| 540                                                                                                                                                                                                                                                                                                           | 6     | 24  | 51       | Foley      | Michael Foley                                          | M   | 1m          | Infant       | Sudden Death                            | Other                    |
| 541                                                                                                                                                                                                                                                                                                           | 6     | 26  | 51       | Riordan    | Margaret Riordan child of John Riordan                 | F   | 1           | Infant       | Marasmus                                | Malnutrition             |
| 542                                                                                                                                                                                                                                                                                                           | 6     | 29  | 51       | Cummings   | Alice Cummings                                         | F   | 2           | Infant       | Pneumonia                               | Infectious               |
| 543                                                                                                                                                                                                                                                                                                           | 7     | 1   | 51       | Lahay      | John Lahay                                             | M   | 50          | Mature Adult | Pneumonia                               | Infectious               |
| 544                                                                                                                                                                                                                                                                                                           | 7     | 5   | 51       | Holland    | Richard Holland                                        | M   | 5.5         | Preschool    | Convulsions                             | Other                    |
| 545                                                                                                                                                                                                                                                                                                           | 7     | 6   | 51       | Smith      | Elizabeth Smith                                        | F   | 43          | Middle Adult | Phthisis [Tuberculosis]                 | Infectious               |
| 546                                                                                                                                                                                                                                                                                                           | 7     | 7   | 51       | Kelly      | Margaret Kelly                                         | F   | 3           | Preschool    | Marasmus                                | Malnutrition             |
| 547                                                                                                                                                                                                                                                                                                           | 7     | 7   | 51       | Creamer    | Margaret Creamer                                       | F   | -           | -            | Chronic Bronchitis                      | Infectious               |
| 548                                                                                                                                                                                                                                                                                                           | 7     | 11  | 51       | McGee      | John McGee                                             | M   | 34          | Middle Adult | Bilious Fever                           | Infectious               |
| 549                                                                                                                                                                                                                                                                                                           | 7     | 12  | 51       | Connelly   | Catherine Connelly                                     | F   | 33          | Middle Adult | Dysentery                               | Infectious               |
| 550                                                                                                                                                                                                                                                                                                           | 7     | 22  | 51       | O'Brien    | Child of Patrick O'Brien                               | U   | 4           | Preschool    | Marasmus                                | Malnutrition             |
| 551                                                                                                                                                                                                                                                                                                           | 7     | 22  | 51       | Morgan     | Catherine Morgan                                       | F   | 24          | Young Adult  | Miscarriage                             | Childbirth               |
| 552                                                                                                                                                                                                                                                                                                           | 7     | 23  | 51       | Connelly   | Elizabeth Connelly                                     | F   | 2m          | Infant       | Cholera Infantum                        | Infectious               |
| 553                                                                                                                                                                                                                                                                                                           | 7     | 23  | 51       | Loobey     | Child of Andrew Loobey                                 | U   | 2m          | Infant       | Cholera Infantum                        | Infectious               |
| 554                                                                                                                                                                                                                                                                                                           | 7     | 23  | 51       | Kurmana    | John Kurmana                                           | M   | 7m          | Infant       | Convulsions                             | Other                    |
| 555                                                                                                                                                                                                                                                                                                           | 7     | 23  | 51       | Lahy       | Child of John Lahy                                     | U   | 9m          | Infant       | Gatarrhal Fever                         | Infectious               |
| 556                                                                                                                                                                                                                                                                                                           | 7     | 27  | 51       | Maxwell    | Michael Maxwell                                        | M   | 11          | Infant       | Cholera Infantum                        | Infectious               |
| 557                                                                                                                                                                                                                                                                                                           | 7     | 29  | 51       | Clancey    | Margaret Clancey                                       | F   | 23d         | Infant       | Atrophy                                 | Other                    |
| 558                                                                                                                                                                                                                                                                                                           | 7     | 30  | 51       | Clancey    | Catherine Clancey                                      | F   | 24d         | Infant       | Atrophy                                 | Gastrointestinal         |
| 559                                                                                                                                                                                                                                                                                                           | 7     | 30  | 51       | McGill     | Ellen McGill                                           | F   | 6m          | Infant       | Cholera Infantum                        | Infectious               |
| 560                                                                                                                                                                                                                                                                                                           | 8     | 2   | 51       | Morgan     | Ellen Morgan                                           | F   | 40          | Middle Adult | Dysentery                               | Infectious               |
| 561                                                                                                                                                                                                                                                                                                           | 8     | 4   | 51       | Boyle      | Child of Thomas Boyle                                  | U   | 7m          | Infant       | Dysentery                               | Infectious               |
| 562                                                                                                                                                                                                                                                                                                           | 8     | 7   | 51       | Powers     | Mary Powers                                            | F   | 14d         | Infant       | Convulsions                             | Other                    |
| 563                                                                                                                                                                                                                                                                                                           | 8     | 9   | 51       | Sherden    | John Sherden                                           | M   | 35          | Middle Adult | Injury                                  | Accident                 |
| 564                                                                                                                                                                                                                                                                                                           | 8     | 10  | 51       | Dooley     | Sarah Jane Dooley                                      | F   | 2.25        | Infant       | Cholera Infantum                        | Infectious               |
| 565                                                                                                                                                                                                                                                                                                           | 8     | 12  | 51       | Burnz      | Richard Burnz                                          | M   | 42          | Middle Adult | Consumption [Tuberculosis]              | Infectious               |
| 566                                                                                                                                                                                                                                                                                                           | 8     | 13  | 51       | McMullen   | Henry McMullen                                         | M   | 1.5         | Infant       | Cholera Infantum                        | Infectious               |
| 567                                                                                                                                                                                                                                                                                                           | 8     | 14  | 51       | McGillan   | Ann McGillan                                           | F   | 1           | Infant       | Cholera Infantum                        | Infectious               |
| 568                                                                                                                                                                                                                                                                                                           | 8     | 15  | 51       | Lenner     | Patrick Lenner                                         | M   | 1           | Infant       | Injury                                  | Accident                 |
| 569                                                                                                                                                                                                                                                                                                           | 8     | 19  | 51       | McQueny    | Celia McQueny                                          | F   | 4.67        | Preschool    | Drowning                                | Accident                 |
| 570                                                                                                                                                                                                                                                                                                           | 8     | 21  | 51       | Sweeney    | Infant of Michael Sweeney                              | U   | 10m         | Infant       | Hydrocephalus                           | Other                    |
| 571                                                                                                                                                                                                                                                                                                           | 8     | 21  | 51       | Miglinn    | James Miglinn                                          | M   | 6m          | Infant       | Congenital Phthisis                     | Infectious               |
| 572                                                                                                                                                                                                                                                                                                           | 8     | 22  | 51       | Mahoney    | John Mahoney                                           | M   | 8m          | Infant       | Cholera Infantum                        | Infectious               |
| 573                                                                                                                                                                                                                                                                                                           | 8     | 25  | 51       | Farall     | Thomas Farall                                          | M   | 6m          | Infant       | Cholera Infantum                        | Infectious               |
| 574                                                                                                                                                                                                                                                                                                           | 8     | 28  | 51       | Keefe      | Michael Keefe                                          | M   | 7           | Child        | Bronchitis & Measels                    | Infectious               |
| 575                                                                                                                                                                                                                                                                                                           | 8     | 28  | 51       | Ledwith    | Elizabeth Ledwith                                      | F   | 17          | Adolescent   | Encysted Ovarian Tumor                  | Other                    |
| 576                                                                                                                                                                                                                                                                                                           | 9     | 1   | 51       | Connolly   | James Connolly                                         | M   | 11m         | Infant       | Cholera Infantum                        | Infectious               |
| 577                                                                                                                                                                                                                                                                                                           | 9     | 7   | 51       | Cullen     | Rose Cullen                                            | F   | 18          | Adolescent   |                                         | Not Recorded             |
| 578                                                                                                                                                                                                                                                                                                           | 9     | 18  | 51       | Connor     | Patrick Connor                                         | M   | 40          | Middle Adult | (see record 393)                        | Not Recorded             |
| 579                                                                                                                                                                                                                                                                                                           | 1     | 8   | 52       | Conway     | Alice Conway                                           | F   | 32          | Middle Adult | Uterine Hemorage                        | Bleeding                 |
| 580                                                                                                                                                                                                                                                                                                           | 4     | 4   | 52       | Downes     | Bridget Downes                                         | F   | 56          | Mature Adult | (see record 194)                        | Not Recorded             |
| 581                                                                                                                                                                                                                                                                                                           | 9     | 9   | 52       | Coleman    | William Coleman                                        | M   | 62          | Mature Adult |                                         | Not Recorded             |
| 582                                                                                                                                                                                                                                                                                                           | 12    | 20  | 55       | Mooney     | Morgan Mooney                                          | M   | 38          | Middle Adult | Church record (no city record)          | Not Recorded             |
| 583                                                                                                                                                                                                                                                                                                           | 2     | 28  | 57       | McNulty    | William McNulty                                        | M   | 30          | Young Adult  | Church record (no city record)          | Not Recorded             |
| 584                                                                                                                                                                                                                                                                                                           | 1     | *   | 41?      | Costello   | Child 1 of 7 (John Costello)                           | U   | 2.5         | Infant       | (headstone June 19, 1841)               | Not Recorded             |
| 585                                                                                                                                                                                                                                                                                                           | 1     | *   | 41?      | Costello   | Child 1 of 7 (Catherine Costello)                      | U   | 5.5         | Preschool    | (headstone June 16, 1841)               | Not Recorded             |
| 586                                                                                                                                                                                                                                                                                                           | 1     | *   | 41?      | Costello   | Child 1 of 7 (William Costello)                        | U   | 7m          | Infant       | (headstone June 16, 1841)               | Not Recorded             |
| 587                                                                                                                                                                                                                                                                                                           | 8     | 7   | 11 (41?) | Flood      | Jane Flood (daughter of) Matthew and Bridget (error ?) | F   | 1.3         | Infant       | Unknown - headstone at Christ's Church  | Not Recorded             |
| 588                                                                                                                                                                                                                                                                                                           | 6     | 2   | 31(41?)  | Shay       | Patrick Shay (transcription error ?)                   | M   | 55          | Mature Adult | Unknown - headstone at Christ's Church  | Not Recorded             |

**Supplementary Table S1. Chronological data on burials (1834-1851) at Christ's Church St. John's the Evangelist Churches, Davenport Ave. & South St. New Haven, Connecticut. Individuals where trauma is recorded cause of death are in bold. Periods of infectious disease in bold box. See text for details.**

| Rec. | Month | Day | Year     | Surname  | Name of Person / Non-New Haven origin            | Sex | Age (years) | Age Class    | Recorded cause of death/Notes          | Recorded Cause of Death |
|------|-------|-----|----------|----------|--------------------------------------------------|-----|-------------|--------------|----------------------------------------|-------------------------|
| 589  | *     | *   | 62 (42?) | Maver    | Caroline Maver                                   | F   | 11m         | Infant       | Church record (no city record)         | Not Recorded            |
| 590  | 9     | 11  | 94( 54?) | Ryan     | Catherine Ryan                                   | F   | 29          | Young Adult  | Church record (no city record)         | Not Recorded            |
| 591  | 9     | 6   | 84(?)    | Ryan     | Henry Ryan                                       | M   | 36          | Middle Adult | Church record (no city record)         | Not Recorded            |
| 592  | 1     | *   | ?        | Unknown  | Child 1 of 7                                     | U   | 1           | Infant       |                                        | Not Recorded            |
| 593  | 1     | *   | ?        | Unknown  | Child 1 of 7                                     | U   | 1           | Infant       |                                        | Not Recorded            |
| 594  | 1     | *   | ?        | Unknown  | Child 1 of 7                                     | U   | 1           | Infant       |                                        | Not Recorded            |
| 595  | 1     | *   | ?        | Unknown  | Child 1 of 7                                     | U   | 1           | Infant       |                                        | Not Recorded            |
| 596  | 1     | *   | ?        | Bovd     | Child (Nellie Bovd (daughter of) William & Mary) | U   | 3           | Preschool    |                                        | Not Recorded            |
| 597  | 7     | *   | ?        | Mackay   | Son of Archy Mackay                              | M   | 5           | Preschool    |                                        | Not Recorded            |
| 598  | 7     | *   | ?        | Corcoran | Infant of John Corcoran                          | U   | >1          | Infant       |                                        | Not Recorded            |
| 599  | 8     | *   | ?        | Unknown  | An infant                                        | U   | -           | Infant       |                                        | Not Recorded            |
| 600  | 9     | *   | ?        | Logan    | Child of John Logan                              | U   | 3m          | Infant       | Cholera Infantum                       | Infectious              |
| 601  | 12    | *   | ?        | Hart     | Miss Hart                                        | F   | 40          | Middle Adult |                                        | Not Recorded            |
| 602  | 12    | *   | ?        | Caffrey  | Child of Patrick Caffrey                         | U   | 1m          | Infant       |                                        | Not Recorded            |
| 603  | *     | *   | ?        | Unknown  | a boy                                            | M   | 3           | Preschool    | Hydrocephalus                          | Other                   |
| 604  | *     | *   | ?        | Reed     | Ann Reed                                         | F   | -           | -            | Unknown - headstone at Christ's Church | Not Recorded            |
| 605  | *     | *   | ?        | Unknown  | per Father Smyth's recollection 5 infants        | F   | -           | Infant       | Church record (no city record)         | Not Recorded            |
