# Supplementary material for: "The dead shall be raised": Multidisciplinary analysis of human skeletons reveals complexity in 19th century immigrant socioeconomic history and identity in New Haven, Connecticut
Source: PubMed Central journal article supplement (PMC6733446; doi:10.1371/journal.pone.0219279), 2019-09-09
Supplement: pone.0219279.s002.pdf [file pone.0219279.s002.pdf]

**Supplementary Table S2. Osteometric data (mm). Mean and Standard Deviations (parentheses). Blank = element too damaged to measure or missing.**

|                             |                                                   | A          | B           | B2            | B3                     |                         |                                  | A                    | B           | B2           | B3           |
|-----------------------------|---------------------------------------------------|------------|-------------|---------------|------------------------|-------------------------|----------------------------------|----------------------|-------------|--------------|--------------|
| <b>Cranium</b>              | GOL (Maximum Cranial Length)                      | -          | -           | 191.99 (0.52) | 191.99 (0.52)          | <b>Humerus</b>          | Max Length                       | -                    | -           | -            | 336 (0)      |
|                             | XCB (Maximum Cranial Breadth )                    | -          | -           | 139.3 (0.24)  | 140.3 (0.84)           |                         | Biomechanical Length             | -                    | -           | -            | 330 (0)      |
|                             | ZYB (Bizygomatic Breadth)                         | -          | -           | 130.9 (0.25)  | -                      |                         | Bipectondylar Width              | -                    | -           | -            | 39.4 (0.1)   |
|                             | BBH (Basion-Bregma Height)                        | -          | -           | 127.7 (0.22)  | 129.1 (0.3)            |                         | Max Midshaft Diameter            | -                    | -           | -            | 20.8 (0.12)  |
|                             | BNL (Cranial Base Length)                         | -          | -           | 100.2 (0.08)  | 104.4 (0.24)           |                         | Min Midshaft Diameter            | -                    | -           | -            | 16.6 (0.1)   |
|                             | BPL (Basion-Prosthion Length)                     | -          | -           | 93.37 (0.13)  | 96.21 (0.43)           |                         | <b>Radius</b>                    | AP Midshaft Diameter | -           | -            | -            |
|                             | MAB (Maxillo-Alveolar Breadth)                    | -          | -           | 53.3 (0.82)   | -                      | ML Midshaft Diameter    |                                  | -                    | -           | -            | 14.9 (0.06)  |
|                             | MAL (maxilla-Alveolar Length)                     | -          | -           | -             | 56.5 (0.53)            | <b>Ulna</b>             | Max Length                       | -                    | -           | 230.5 (0.32) | 265.7 (0.58) |
|                             | AUB (Biauricular Breadth)                         | -          | -           | 122 (0.28)    | 119.6 (0.39)           |                         | Biomechanical Length             | -                    | -           | -            | 240.8 (0.31) |
|                             | UFHT (Upper Facial Height)                        | -          | -           | 70.8 (0.23)   | 69.4 (0.14)            |                         | Physiological Length             | -                    | -           | 14.5 (0.1)   | 232.4 (0.06) |
|                             | WFB (Minimum Frontal Breadth)                     | -          | -           | 93.5 (0.62)   | 94.4 (0.11)            |                         | Max AP Diameter                  | -                    | -           | 17.2 (0.12)  | 12.5 (0.11)  |
|                             | UFBR (Upper Facial Breadth )                      | -          | -           | 101.6 (0.02)  | 106.3 (0.09)           |                         | Max ML Diameter                  | -                    | -           | -            | 18 (0.06)    |
|                             | NLH (Nasal Height)                                | -          | -           | 51.1 (0.41)   | 50 (0.4)               |                         | Min Circumference                | -                    | 406 (0)     | 445 (0)      | -            |
|                             | NLB (Nasal Breadth )                              | -          | -           | 20.7 (0.21)   | 19.7 (0.13)            | <b>Pelvis</b>           | Os Coxae Height                  | -                    | 402.7 (0.6) | 441 (0)      | -            |
|                             | OBH (Orbital Breadth)                             | -          | -           | 37.7 (0.35)   | 43 (0.38)              |                         | Iliac Length                     | -                    | 86.7 (0.29) | 46.5 (0.2)   | -            |
|                             | OBH (Orbital Height)                              | -          | -           | 36.7 (0.22)   | 45.3 (0.57)            |                         | Pubic Length                     | -                    | -           | 88.5 (0.06)  | -            |
|                             | EKB (Biorbital Breadth )                          | -          | -           | 90.7 (0.59)   | 99.2 (0.34)            |                         | Acetabulosymphyseal Length       | -                    | -           | 90.5 (0.5)   | -            |
|                             | DKB ( Interorbital Breadth)                       | -          | -           | 19.9 (0.15)   | 17 (0)                 |                         | Ischial Length                   | -                    | 27.7 (0)    | -            | 97.4 (0.32)  |
|                             | FRC (Frontal Chord)                               | -          | -           | 112.3 (0.17)  | 117.9 (0.32)           |                         | Acetabular Height                | -                    | 26.9 (0.06) | -            | 54.9 (0.51)  |
|                             | PAC (Parietal Chord)                              | -          | -           | 114 (0.64)    | 96.9 (0.31)            |                         | Acetabular Depth                 | -                    | 333 (0)     | 29.1 (0.06)  | -            |
|                             | OCC (Occipital Chord)                             | -          | -           | 91.5 (0.48)   | 104.4 (0.71)           |                         | Obturator Foramen Length         | -                    | -           | 27.9 (0.06)  | 55.2 (0.21)  |
|                             | FOL (Foramen Magnum Length)                       | -          | -           | 40.3 (0.18)   | 38.2 (0.07)            |                         | Obturator Foramen Breadth        | -                    | -           | 369.7 (0.58) | 32.5 (0.55)  |
|                             | FOB (Foramen Magnum Breadth )                     | -          | -           | -             | 27.8 (0.11)            |                         | <b>Femur</b>                     | Max Length           | -           | -            | -            |
|                             | MDH (Mastoid Height)                              | -          | -           | 28 (1)        | 32.4 (0.93)            | Biomechanical Length    |                                  | -                    | 77.7 (0.58) | 64.5 (0.1)   | -            |
|                             | ASB (Biasterionic Breadth )                       | -          | -           | 112.1 (0.15)  | 110 (1.11)             | Bicondylar Length       |                                  | -                    | 84.7 (0.58) | 45.7 (0.21)  | -            |
|                             | MOW (Mid-orbital Width)                           | -          | -           | 37.2 (0.48)   | -                      | Max Head Diameter       |                                  | -                    | 27.7 (0.1)  | 80.7 (0.06)  | 48.3 (0.15)  |
| ZMB (Zygomaxillary Breadth) | -                                                 | -          | 86.1 (0.07) | 91.2 (0.24)   | Midshaft Circumference | -                       |                                  | 21.1 (0.06)          | 99.4 (0.15) | 87.7 (0.06)  |              |
| <b>Mandible</b>             | GNI (Chin Height )                                | -          | -           | 30.1 (0.22)   | 31.1 (0.42)            | Midshaft Circumference  |                                  | -                    | 21.5 (0.12) | 28.6 (0.12)  | 89.7 (0.29)  |
|                             | HMF (Mandibular Body Height at Mental Foramen)    | -          | -           | 15.8 (0)      | -                      | Epicondylar Width       |                                  | -                    | -           | 24.3 (0.1)   | -            |
|                             | TMF (Mandibular Body Thickness at Mental Foramen) | -          | -           | 13.2 (0.17)   | -                      | Torsion                 |                                  | -                    | -           | 27.5 (0.06)  | -            |
|                             | GOG (Bigonial Width)                              | -          | -           | 93 (0.04)     | 102 (0.76)             | AP Midshaft Diameter    | -                                | -                    | 354 (0)     | 30.3 (0.1)   |              |
|                             | CDL (Bicondylar Breadth)                          | -          | -           | 125.9 (0.13)  | -                      | ML Midshaft Diameter    | -                                | -                    | 14.6 (0.1)  | 27.1 (0.06)  |              |
|                             | WRB (Minimum Ramus Breadth)                       | -          | -           | 32.9 (0.06)   | -                      | <b>Tibia</b>            | Max Length                       | -                    | -           | 11.4 (0.12)  | -            |
|                             | MLN (Mandibular Length)                           | -          | -           | -             | 67.3 (0.58)            |                         | Biomechanical Length- Medial     | -                    | -           | 42.4 (0.99)  | -            |
|                             | XRH (Maximum Ramus Height)                        | -          | -           | 63.1 (0.43)   | -                      |                         | Circumference at NF              | -                    | -           | -            | 91 (0.5)     |
| <b>Clavicle</b>             | Max Length                                        | 129 (0.0)  | -           | -             | 158 (0)                |                         | Cicumference at Nutrient Foramen | -                    | -           | -            | 89.9 (0.2)   |
|                             | Circumference at Middle                           | 3.5 (0.06) | -           | -             | 32.3 (0.12)            | ML Midshaft Diameter    | -                                | -                    | -           | 25.3 (0.06)  |              |
|                             |                                                   |            |             |               |                        | ML Shaft Diameter at NF | -                                | -                    | -           | 25.1 (0.1)   |              |
|                             |                                                   |            |             |               | <b>Fibula</b>          | Max Length              | -                                | -                    | -           | 360 (0)      |              |
