# Supplementary material for: "The dead shall be raised": Multidisciplinary analysis of human skeletons reveals complexity in 19th century immigrant socioeconomic history and identity in New Haven, Connecticut
Source: PubMed Central journal article supplement (PMC6733446; doi:10.1371/journal.pone.0219279), 2019-09-09
Supplement: pone.0219279.s004.pdf [file pone.0219279.s004.pdf]

**Supplementary Data Table S4. Craniometric assessment of YNH4 individuals B2 and B3 via FORDISC stepwise weighted method.**

| YNH4 Individual B2                                                                                                                                                                                       |                 |               |           |               |         |                 |         | YNH4 Individual B3                                             |                 |               |           |               |                 |       |         |
|----------------------------------------------------------------------------------------------------------------------------------------------------------------------------------------------------------|-----------------|---------------|-----------|---------------|---------|-----------------|---------|----------------------------------------------------------------|-----------------|---------------|-----------|---------------|-----------------|-------|---------|
|                                                                                                                                                                                                          |                 | OBB           | BBH       | ZYB           | ASB     | GOL             |         |                                                                | OBB             | BBH           | ZMB       | FOL           |                 |       |         |
|                                                                                                                                                                                                          |                 | BPL           | PAC       | NLH           | MAB     | ZMB             |         |                                                                | ASB             | XCB           | GOL       | OCC           |                 |       |         |
| From Group                                                                                                                                                                                               | Total Number    | Into Group    |           |               |         |                 |         | From Group                                                     | Total Number    | Into Group    |           |               |                 |       |         |
|                                                                                                                                                                                                          |                 | BERM          | NORM      | WM19          | WM20    | ZALM            | Correct |                                                                |                 | BERM          | NORM      | WM19          | WM20            | ZALM  | Correct |
| BERM                                                                                                                                                                                                     | 56              | 37            | 13        | 1             | 0       | 5               | 66.10%  | BERM                                                           | 56              | 41            | 6         | 4             | 3               | 2     | 73.20%  |
| NORM                                                                                                                                                                                                     | 55              | 7             | 26        | 1             | 2       | 19              | 47.30%  | NORM                                                           | 55              | 4             | 32        | 0             | 5               | 14    | 58.20%  |
| WM19                                                                                                                                                                                                     | 98              | 7             | 5         | 72            | 6       | 8               | 73.50%  | WM19                                                           | 98              | 9             | 11        | 64            | 5               | 9     | 65.30%  |
| WM20                                                                                                                                                                                                     | 197             | 5             | 7         | 8             | 167     | 10              | 84.80%  | WM20                                                           | 369             | 14            | 25        | 18            | 284             | 28    | 77.00%  |
| ZALM                                                                                                                                                                                                     | 53              | 9             | 10        | 6             | 2       | 26              | 49.10%  | ZALM                                                           | 53              | 5             | 8         | 9             | 3               | 28    | 52.80%  |
| Total Correct: 328 out of 459 (71.5 %) *** CROSS-VALIDATED ***                                                                                                                                           |                 |               |           |               |         |                 |         | Total Correct: 449 out of 631 (71.2 %) *** CROSS-VALIDATED *** |                 |               |           |               |                 |       |         |
| Multigroup Classification                                                                                                                                                                                |                 |               |           |               |         |                 |         | Multigroup Classification                                      |                 |               |           |               |                 |       |         |
| Group                                                                                                                                                                                                    | Classified into | Distance from | Posterior | Probabilities |         |                 |         | Group                                                          | Classified into | Distance from | Posterior | Probabilities |                 |       |         |
|                                                                                                                                                                                                          |                 |               |           | Typ F         | Typ Chi | Typ R           |         |                                                                |                 |               | Typ F     | Typ Chi       | Typ R           |       |         |
| WM19                                                                                                                                                                                                     | **WM19**        | 6             | 0.857     | 0.829         | 0.816   | 0.939 (6/99)    | NORM    | **NORM**                                                       | 7.1             | 0.765         | 0.545     | 0.522         | 0.357 (36/56)   |       |         |
| NORM                                                                                                                                                                                                     |                 | 11.2          | 0.063     | 0.378         | 0.342   | 0.143 (48/56)   | ZALM    |                                                                | 11              | 0.112         | 0.224     | 0.202         | 0.056 (51/54)   |       |         |
| BERM                                                                                                                                                                                                     |                 | 11.5          | 0.055     | 0.356         | 0.321   | 0.333 (38/57)   | WM20    |                                                                | 11.6            | 0.084         | 0.183     | 0.172         | 0.235 (283/370) |       |         |
| ZALM                                                                                                                                                                                                     |                 | 13.5          | 0.02      | 0.228         | 0.197   | 0.037 (52/54)   | BERM    |                                                                | 13.3            | 0.036         | 0.118     | 0.103         | 0.088 (52/57)   |       |         |
| WM20                                                                                                                                                                                                     |                 | 16.4          | 0.005     | 0.103         | 0.088   | 0.157 (167/198) | WM19    |                                                                | 18              | 0.003         | 0.026     | 0.021         | 0.071 (92/99)   |       |         |
| YNH4 INDIVIDUAL B2 is closest to WM19s                                                                                                                                                                   |                 |               |           |               |         |                 |         | YNH4 INDIVIDUAL B3 is closest to NORMs                         |                 |               |           |               |                 |       |         |
| Group Means (mm)                                                                                                                                                                                         |                 |               |           |               |         |                 |         | Group Means (mm)                                               |                 |               |           |               |                 |       |         |
| YNH4 B2                                                                                                                                                                                                  | Chk             | BERM          | NORM      | WM19          | WM20    | ZALM            |         | YNH4 B3                                                        | Chk             | BERM          | NORM      | WM19          | WM20            | ZALM  |         |
|                                                                                                                                                                                                          |                 | 56            | 55        | 98            | 197     | 53              |         |                                                                |                 | 56            | 55        | 98            | 369             | 53    |         |
| OBB                                                                                                                                                                                                      | 38              | -             | 40.1      | 40.4          | 38.1    | 41.3            | 40      | OBB                                                            | 43              | +             | 40.1      | 40.4          | 38.1            | 41.3  | 40      |
| BBH                                                                                                                                                                                                      | 128             | -             | 130.3     | 131.7         | 133.9   | 141.2           | 134.8   | BBH                                                            | 129             | -             | 130.3     | 131.7         | 133.9           | 140.4 | 134.8   |
| ZYB                                                                                                                                                                                                      | 131             | -             | 135.6     | 134.4         | 132.1   | 129.5           | 133     | ZMB                                                            | 91              | -             | 93.3      | 94            | 91.2            | 89.4  | 94.8    |
| ASB                                                                                                                                                                                                      | 112             | -             | 113.6     | 111.9         | 111.6   | 114.6           | 111     | FOL                                                            | 38              | -             | 39        | 36.5          | 36.3            | 37.6  | 37.2    |
| GOL                                                                                                                                                                                                      | 183             | -             | 180.3     | 188.5         | 183.1   | 187.7           | 185.1   | ASB                                                            | 110             | -             | 113.6     | 111.9         | 111.6           | 114.5 | 111     |
| BPL                                                                                                                                                                                                      | 93              | -             | 93.8      | 97            | 94.9    | 98.5            | 97.1    | XCB                                                            | 140             | -             | 147.6     | 141.9         | 142.7           | 140.5 | 141.4   |
| PAC                                                                                                                                                                                                      | 114             | -             | 110.1     | 114.4         | 120.4   | 118.2           | 115.3   | GOL                                                            | 192             | +             | 180.3     | 188.5         | 183.1           | 187.2 | 185.1   |
| NLH                                                                                                                                                                                                      | 51              | -             | 51.7      | 52            | 52.8    | 52.8            | 51.4    | OCC                                                            | 104             | +             | 94        | 97.3          | 93.5            | 100.3 | 96.2    |
| MAB                                                                                                                                                                                                      | 53              | --            | 63.9      | 63.6          | 59.6    | 61.2            | 64.2    |                                                                |                 |               |           |               |                 |       |         |
| ZMB                                                                                                                                                                                                      | 86              | -             | 93.3      | 94            | 91.2    | 89.4            | 94.8    |                                                                |                 |               |           |               |                 |       |         |
| Natural Log of VCVM Determinant = 27.352                                                                                                                                                                 |                 |               |           |               |         |                 |         | Natural Log of VCVM Determinant = 21.9739                      |                 |               |           |               |                 |       |         |
| BERM = Berg, Carinthia, Austria; NORM = Medieval Norse, Oslo, Norway; WM19 = 19th C. Euro-Americans, USA; WM20 = 20th C. Euro-Americans, USA; ZALM = Medieval Zalavar, Hungary. M = Males (all samples). |                 |               |           |               |         |                 |         |                                                                |                 |               |           |               |                 |       |         |
| +/- measurement deviates higher/lower than all group means; +/- deviates one to two standard deviations                                                                                                  |                 |               |           |               |         |                 |         |                                                                |                 |               |           |               |                 |       |         |
