# Supplementary material for: "The dead shall be raised": Multidisciplinary analysis of human skeletons reveals complexity in 19th century immigrant socioeconomic history and identity in New Haven, Connecticut
Source: PubMed Central journal article supplement (PMC6733446; doi:10.1371/journal.pone.0219279), 2019-09-09
Supplement: pone.0219279.s005.pdf [file pone.0219279.s005.pdf]

**Supplementary Table S5. Enthesal Scoring following Mariotti et al. [76, 77]. L=left, R=right. RB=Robusticity, EF=enthesophytic, OL=osteolytic. - = not present; X = feature too damaged to record.**

|              |                              | A                          |    |    |    |    |    | B  |    |    |    |    |    | B2 |    |    |    |    |    | B3 |    |    |    |    |    |   |   |   |   |   |  |
|--------------|------------------------------|----------------------------|----|----|----|----|----|----|----|----|----|----|----|----|----|----|----|----|----|----|----|----|----|----|----|---|---|---|---|---|--|
|              |                              | L                          |    |    | R  |    |    | L  |    |    | R  |    |    | L  |    |    | R  |    |    | L  |    |    | R  |    |    |   |   |   |   |   |  |
|              |                              | RB                         | EF | OL | RB | EF | OL | RB | EF | OL | RB | EF | OL | RB | EF | OL | RB | EF | OL | RB | EF | OL | RB | EF | OL |   |   |   |   |   |  |
| Forelimb     | M. triceps brachii (scapula) | -                          |    |    | X  |    |    | X  |    |    | X  |    |    | -  |    |    | 1C | 1  | 0  | 3  | 1  | 3  | 2  | 0  | 2  |   |   |   |   |   |  |
|              | Clavicle                     | Costoclavicular lig.       | X  |    |    | 1B | 1  | 2  | -  |    |    | -  |    |    | -  |    |    | -  |    |    | -  |    |    | -  |    |   |   |   |   |   |  |
|              |                              | Conoid lig.                | 1  | 1  | 0  | 1C | 1  | 0  | X  |    |    | 2  | 2  | 3  | 1C | 1  | 0  | 1C | 1  | 2  | 2  | 2  | 0  | 1  | 1  | 0 |   |   |   |   |  |
|              |                              | Trapezoid lig.             | 1B | 0  | 1  | 2  | 2  | 0  | X  |    |    | X  |    |    | 1C | 1  | 0  | 2  | 2  | 0  | 3  | 3  | 1  | 2  | 1  | 1 |   |   |   |   |  |
|              |                              | M. pectoralis major        | -  |    |    | 2  | 2  | 1  | 1  | 1  | 0  | 1  | 1  | 0  | 2  | 1  | 0  | 3  | 2  | 0  | 1C | 1  | 2  |    |    | X |   |   |   |   |  |
|              |                              | M. deltoideus              | -  |    |    | -  |    |    | 2  | 2  | 1  | X  |    |    | X  |    |    | 1C | 1  | 2  | 3  | 3  | 0  | 2  | 2  | 2 |   |   |   |   |  |
|              | Humerus                      | M. pectoralis major        | X  |    |    | -  |    |    | 1B | 1  | 2  | X  |    |    | -  |    |    | X  |    |    | 2  | 1  | 0  | 3  | 2  | 0 |   |   |   |   |  |
|              |                              | M. lat. dorsii/teres major | X  |    |    | X  |    |    | X  |    |    | 1  | 0  | 1  | -  |    |    | X  |    |    | 2  | 1  | 3  | 2  | 1  | 3 |   |   |   |   |  |
|              |                              | M. deltoideus              | X  |    |    | X  |    |    | X  |    |    | 1  | 1  | 0  | -  |    |    | 2  | 1  | 0  | 2  | 2  | 0  | 2  | 1  | 0 |   |   |   |   |  |
|              |                              | M. brachioradialis         | -  |    |    | -  |    |    | X  |    |    | X  |    |    | -  |    |    | X  |    |    | 2  | 1  | 0  |    |    | X |   |   |   |   |  |
|              | Radius                       | M. biceps brachii          | X  |    |    | X  |    |    | X  |    |    | X  |    |    | -  |    |    | 2  | 0  | 1  | 3  | 2  | 3  |    |    | X |   |   |   |   |  |
|              |                              | M. pronator teres          | -  |    |    | X  |    |    | 1B | 0  | 1  | X  |    |    | -  |    |    | 1A | 0  | 0  |    |    | X  |    |    | 2 | 2 | 1 |   |   |  |
|              |                              | Interosseous membrane      | -  |    |    | X  |    |    | 1A | 0  | 0  | 1A | 0  | 0  | 1C | 1  |    |    |    |    | 2  | 3  | 1  | 2  | 2  | 0 |   |   |   |   |  |
|              | Ulna                         | M. brachialis              | -  |    |    | -  |    |    | -  |    |    | -  |    |    | 2  | 3  | 1  |    |    |    | 3  | 3  | 1  | 3  | 3  | 2 |   |   |   |   |  |
|              |                              | M. triceps brachii         | -  |    |    | -  |    |    | -  |    |    | -  |    |    | X  |    |    |    |    |    | 2  | 1  | 3  | 2  | 1  | 3 |   |   |   |   |  |
| M. supinator |                              | 2                          | 0  | 2  | -  |    |    | -  |    |    | -  |    |    | 3  | 2  | 2  |    |    |    | 3  | 1  | 2  | 3  | 1  | 3  |   |   |   |   |   |  |
| Hindlimb     | Femur                        | M. gluteus maximus         | -  |    |    |    |    |    | 2  | 1  | 2  | 2  | 1  | 1  | 2  | 2  | 1  | 1C | 1  | 1  | 3  | 3  | 1  | 3  | 3  | 2 |   |   |   |   |  |
|              |                              | M. iliopsoas               |    |    |    |    |    |    | X  |    |    | X  |    |    | X  |    |    | X  |    |    | 2  | 1  | 0  | 2  | 1  | 0 | 2 | 1 | 0 |   |  |
|              |                              | M. vastus medialis         |    |    |    |    |    |    | 2  | 2  | 1  | 2  | 1  | 1  | 1C | 1  | 0  | 1C | 1  | 0  | 2  | 1  | 0  | 2  | 1  | 0 | 3 | 2 | 0 |   |  |
|              | M. soleus (tibia)            | -                          |    |    |    |    |    |    |    |    | -  |    |    | 3  | 3  | 1  | 2  | 2  | 1  | 2  | 2  | 1  | 3  | 3  | 2  | 3 | 1 | 1 |   |   |  |
|              | Quadriceps tendon (tibia)    | -                          |    |    |    |    |    |    |    |    | -  |    |    | 2  | 1  | 0  | X  |    |    | 2  | 1  | 0  |    |    | X  |   |   | 2 | 1 | 0 |  |
|              | Quadriceps tendon (patella)  | -                          |    |    |    |    |    |    |    |    | -  |    |    | X  |    |    | 1B | 1  | 1  | 1B | 1  | 0  |    |    | -  |   |   | 2 | 1 | 2 |  |
|              | Achilles tendon (calcaneus)  | -                          |    |    |    |    |    |    |    |    | -  |    |    | X  |    |    | 3  | 3  | 0  | X  |    |    | 3  | 2  | 2  |   |   | X |   |   |  |
