# Supplementary material for: "The dead shall be raised": Multidisciplinary analysis of human skeletons reveals complexity in 19th century immigrant socioeconomic history and identity in New Haven, Connecticut
Source: PubMed Central journal article supplement (PMC6733446; doi:10.1371/journal.pone.0219279), 2019-09-09
Supplement: pone.0219279.s006.pdf [file pone.0219279.s006.pdf]

**Supplementary Table S6. Dental calculus weight, DNA yield and microbiome classification and distribution across the YNH4. Taxa sorted by presence/absence in the human oral microbiome and by average frequency across the four individuals.**

| Kingdom  | Phylum           | Class                 | Order               | Family                  | Genus                               | YNH.A                          | YNH.B | YNH.B2 | YNH.B3 | Present in human oral microbiome? |      |      |      |      |
|----------|------------------|-----------------------|---------------------|-------------------------|-------------------------------------|--------------------------------|-------|--------|--------|-----------------------------------|------|------|------|------|
|          |                  |                       |                     |                         |                                     | Calculus Weight (mg)           |       |        |        |                                   | 9.7  | 10.6 | 10.2 | 9.0  |
|          |                  |                       |                     |                         |                                     | DNA yield (ng DNA / mg sample) |       |        |        |                                   | 13.7 | 14.8 | 40.0 | 14.5 |
|          |                  |                       |                     |                         |                                     | DNA yield (ng DNA/mg sample)   |       |        |        |                                   |      |      |      |      |
| Archaea  | Euryarchaeota    | Methanobacteria       | Methanobacteriales  | Methanobacteriaceae     | <i>Methanobrevibacter</i>           | 3649                           | 2893  | 671    | 2873   | YES                               |      |      |      |      |
| Bacteria | Firmicutes       | Clostridia            | Clostridiales       | [Mogibacteriaceae]      |                                     | 326                            | 1130  | 1184   | 575    | YES                               |      |      |      |      |
| Bacteria | TM7              | TM7-3                 |                     |                         |                                     | 432                            | 961   | 1399   | 263    | YES                               |      |      |      |      |
| Bacteria | Actinobacteria   | Coriobacteria         | Coriobacteriales    | Coriobacteriaceae       |                                     | 256                            | 463   | 276    | 1407   | YES                               |      |      |      |      |
| Bacteria | Chloroflexi      | Anaerolineae          | Anaerolineales      | Anaerolinaceae          | <i>SHD-231</i>                      | 116                            | 558   | 763    | 295    | YES                               |      |      |      |      |
| Bacteria | Synergistetes    | Synergistia           | Synergistales       | Dethiosulfovibrionaceae | <i>TG5</i>                          | 148                            | 295   | 979    | 290    | YES                               |      |      |      |      |
| Bacteria | Firmicutes       | Clostridia            | Clostridiales       | [Tissierellaceae]       |                                     | 29                             | 350   | 491    | 112    | YES                               |      |      |      |      |
| Bacteria | TM7              | TM7-3                 | I025                | Rs-045                  |                                     | 30                             | 617   | 33     | 72     | YES                               |      |      |      |      |
| Bacteria | Firmicutes       | Clostridia            | Clostridiales       |                         |                                     | 87                             | 138   | 423    | 98     | YES                               |      |      |      |      |
| Bacteria | Firmicutes       | Bacilli               | Lactobacillales     | Streptococcaceae        | <i>Streptococcus</i>                | 111                            | 179   | 385    | 54     | YES                               |      |      |      |      |
| Bacteria | Actinobacteria   | Actinobacteria        | Actinomycetales     | Actinomycetaceae        | <i>Actinomyces</i>                  | 96                             | 183   | 262    | 47     | YES                               |      |      |      |      |
| Bacteria | Firmicutes       | Clostridia            | Clostridiales       | Lachnospiraceae         |                                     | 58                             | 119   | 315    | 82     | YES                               |      |      |      |      |
| Bacteria | Proteobacteria   | Epsilonproteobacteria | Campylobacterales   | Campylobacteraceae      | <i>Campylobacter</i>                | 74                             | 85    | 220    | 71     | YES                               |      |      |      |      |
| Bacteria | Proteobacteria   | Betaproteobacteria    | Burkholderiales     | Burkholderiaceae        | <i>Lautropia</i>                    | 181                            | 0     | 75     | 5      | YES                               |      |      |      |      |
| Bacteria | Bacteroidetes    | Flavobacteriia        | Flavobacteriales    | Flavobacteriaceae       | <i>Capnocytophaga</i>               | 42                             | 11    | 181    | 19     | YES                               |      |      |      |      |
| Bacteria | Proteobacteria   | Gammaproteobacteria   | Pasteurellales      | Pasteurellaceae         | <i>Aggregatibacter</i>              | 17                             | 2     | 186    | 7      | YES                               |      |      |      |      |
| Bacteria | TM7              | TM7-3                 | CW040               | F16                     |                                     | 19                             | 21    | 159    | 8      | YES                               |      |      |      |      |
| Bacteria | Firmicutes       | Clostridia            | Clostridiales       | Peptostreptococcaceae   |                                     | 72                             | 13    | 70     | 37     | YES                               |      |      |      |      |
| Bacteria | TM7              | TM7-3                 | CW040               |                         |                                     | 43                             | 20    | 122    | 5      | YES                               |      |      |      |      |
| Bacteria | Firmicutes       | Clostridia            | Clostridiales       | [Mogibacteriaceae]      | <i>Mogibacterium</i>                | 12                             | 9     | 102    | 5      | YES                               |      |      |      |      |
| Bacteria | Proteobacteria   | Deltaproteobacteria   | Desulfobacterales   | Desulfobulbaceae        | <i>Desulfobulbus</i>                | 12                             | 27    | 20     | 62     | YES                               |      |      |      |      |
| Bacteria | Firmicutes       | Clostridia            | Clostridiales       | Veillonellaceae         | <i>Selenomonas</i>                  | 16                             | 28    | 49     | 26     | YES                               |      |      |      |      |
| Bacteria | Fusobacteria     | Fusobacteriia         | Fusobacteriales     | Leptotrichiaceae        | <i>Leptotrichia</i>                 | 12                             | 5     | 86     | 15     | YES                               |      |      |      |      |
| Bacteria | Proteobacteria   | Betaproteobacteria    | Neisseriales        | Neisseriaceae           | <i>Neisseria</i>                    | 13                             | 1     | 87     | 13     | YES                               |      |      |      |      |
| Bacteria | Spirochaetes     | Spirochaetes          | Spirochaetales      | Spirochaetaceae         | <i>Treponema</i>                    | 7                              | 16    | 81     | 5      | YES                               |      |      |      |      |
| Bacteria | Proteobacteria   | Betaproteobacteria    | Neisseriales        | Neisseriaceae           |                                     | 12                             | 15    | 67     | 2      | YES                               |      |      |      |      |
| Bacteria | Bacteroidetes    | Bacteroidia           | Bacteroidales       | Porphyromonadaceae      | <i>Tannerella</i>                   | 26                             | 19    | 40     | 7      | YES                               |      |      |      |      |
| Bacteria | Firmicutes       | Bacilli               | Gemellales          | Gemellaceae             | <i>Gemella</i>                      | 26                             | 5     | 47     | 8      | YES                               |      |      |      |      |
| Bacteria | Firmicutes       | Clostridia            | Clostridiales       | Eubacteriaceae          | <i>Pseudoramibacter Eubacterium</i> | 4                              | 0     | 69     | 7      | YES                               |      |      |      |      |
| Bacteria | Bacteroidetes    | Bacteroidia           | Bacteroidales       | Porphyromonadaceae      | <i>Paludibacter</i>                 | 22                             | 6     | 37     | 12     | YES                               |      |      |      |      |
| Bacteria | Fusobacteria     | Fusobacteriia         | Fusobacteriales     | Fusobacteriaceae        | <i>Fusobacterium</i>                | 3                              | 4     | 57     | 2      | YES                               |      |      |      |      |
| Bacteria | Firmicutes       | Clostridia            | Clostridiales       | [Tissierellaceae]       | <i>Parvimonas</i>                   | 12                             | 7     | 41     | 4      | NO                                |      |      |      |      |
| Bacteria | Actinobacteria   | Actinobacteria        | Actinomycetales     | Micrococcaceae          | <i>Rothia</i>                       | 21                             | 1     | 3      | 26     | YES                               |      |      |      |      |
| Bacteria | Bacteroidetes    | Bacteroidia           | Bacteroidales       | Porphyromonadaceae      | <i>Porphyromonas</i>                | 3                              | 1     | 36     | 0      | YES                               |      |      |      |      |
| Bacteria | Firmicutes       | Clostridia            | Clostridiales       | Peptostreptococcaceae   | <i>Liftfactor</i>                   | 5                              | 2     | 32     | 1      | YES                               |      |      |      |      |
| Bacteria | Proteobacteria   | Betaproteobacteria    | Neisseriales        | Neisseriaceae           | <i>Eikenella</i>                    | 3                              | 4     | 25     | 2      | YES                               |      |      |      |      |
| Bacteria | Proteobacteria   | Gammaproteobacteria   | Cardiobacteriales   | Cardiobacteriaceae      | <i>Cardiobacterium</i>              | 1                              | 1     | 26     | 4      | YES                               |      |      |      |      |
| Bacteria | Bacteroidetes    | Bacteroidia           | Bacteroidales       | Prevotellaceae          | <i>Prevotella</i>                   | 5                              | 1     | 21     | 1      | YES                               |      |      |      |      |
| Bacteria | Actinobacteria   | Coriobacteria         | Coriobacteriales    | Coriobacteriaceae       | <i>Atopobium</i>                    | 4                              | 3     | 7      | 14     | YES                               |      |      |      |      |
| Bacteria | Firmicutes       | Clostridia            | Clostridiales       | Lachnospiraceae         | <i>Catonella</i>                    | 14                             | 0     | 6      | 6      | YES                               |      |      |      |      |
| Bacteria | Firmicutes       | Clostridia            | Clostridiales       | Lachnospiraceae         | <i>Butyrivibrio</i>                 | 2                              | 5     | 15     | 2      | YES                               |      |      |      |      |
| Bacteria | Firmicutes       | Clostridia            | Clostridiales       | Peptococcaceae          | <i>Peptococcus</i>                  | 2                              | 4     | 14     | 4      | YES                               |      |      |      |      |
| Bacteria | Firmicutes       | Bacilli               | Lactobacillales     | Carnobacteriaceae       | <i>Granulicatella</i>               | 12                             | 0     | 5      | 0      | YES                               |      |      |      |      |
| Bacteria | Firmicutes       | Clostridia            | Clostridiales       | [Tissierellaceae]       | <i>Peptoniphilus</i>                | 2                              | 4     | 9      | 0      | YES                               |      |      |      |      |
| Bacteria | Actinobacteria   | Actinobacteria        | Actinomycetales     | Corynebacteriaceae      | <i>Corynebacterium</i>              | 0                              | 0     | 3      | 10     | YES                               |      |      |      |      |
| Bacteria | Proteobacteria   | Gammaproteobacteria   | Pasteurellales      | Pasteurellaceae         | <i>Haemophilus</i>                  | 4                              | 0     | 3      | 1      | YES                               |      |      |      |      |
| Bacteria | Actinobacteria   | Coriobacteriia        | Coriobacteriales    | Coriobacteriaceae       | <i>Slackia</i>                      | 0                              | 5     | 1      | 2      | YES                               |      |      |      |      |
| Bacteria | Firmicutes       | Clostridia            | Clostridiales       | Lachnospiraceae         | <i>Oribacterium</i>                 | 3                              | 0     | 2      | 3      | YES                               |      |      |      |      |
| Bacteria | Firmicutes       | Erysipelotrichi       | Erysipelotrichales  | Erysipelotrichaceae     | <i>Bulleidia</i>                    | 1                              | 1     | 5      | 0      | YES                               |      |      |      |      |
| Bacteria | Firmicutes       | Clostridia            | Clostridiales       | Veillonellaceae         | <i>Dialister</i>                    | 4                              | 1     | 2      | 0      | YES                               |      |      |      |      |
| Bacteria | Firmicutes       | Clostridia            | Clostridiales       | Veillonellaceae         | <i>Veillonella</i>                  | 4                              | 2     | 0      | 1      | YES                               |      |      |      |      |
| Bacteria | Actinobacteria   | Actinobacteria        | Actinomycetales     | Propionibacteriaceae    | <i>Propionibacterium</i>            | 0                              | 3     | 0      | 4      | YES                               |      |      |      |      |
| Bacteria | Proteobacteria   | Deltaproteobacteria   | Desulfobacteriales  | Desulfobulbaceae        | <i>Desulfobulbus</i>                | 0                              | 4     | 0      | 0      | YES                               |      |      |      |      |
| Bacteria | Firmicutes       | Bacilli               | Bacillales          | Paenibacillaceae        | <i>Paenibacillus</i>                | 1                              | 3     | 0      | 0      | YES                               |      |      |      |      |
| Bacteria | Actinobacteria   | Actinobacteria        | Bifidobacteriales   | Bifidobacteriaceae      | <i>Bifidobacterium</i>              | 0                              | 0     | 0      | 3      | YES                               |      |      |      |      |
| Bacteria | Proteobacteria   | Betaproteobacteria    | Burkholderiales     | Oxalobacteraceae        | <i>Ralstonia</i>                    | 0                              | 0     | 0      | 3      | YES                               |      |      |      |      |
| Bacteria | Firmicutes       | Bacilli               | Lactobacillales     | Aerococcaceae           | <i>Abiotrophia</i>                  | 1                              | 0     | 1      | 0      | YES                               |      |      |      |      |
| Bacteria | Proteobacteria   | Gammaproteobacteria   | Pseudomonadales     | Moraxellaceae           | <i>Moraxella</i>                    | 1                              | 0     | 1      | 0      | YES                               |      |      |      |      |
| Bacteria | Firmicutes       | Clostridia            | Clostridiales       | Peptostreptococcaceae   | <i>Peptostreptococcus</i>           | 1                              | 0     | 1      | 0      | YES                               |      |      |      |      |
| Bacteria | Actinobacteria   | Actinobacteria        | Actinomycetales     | Micrococcaceae          | <i>Kocuria</i>                      | 0                              | 0     | 0      | 2      | YES                               |      |      |      |      |
| Bacteria | Firmicutes       | Bacilli               | Bacillales          | Bacillaceae             | <i>Bacillus</i>                     | 0                              | 0     | 0      | 1      | YES                               |      |      |      |      |
| Bacteria | Bacteroidetes    | Bacteroidia           | Bacteroidales       | Bacteroidaceae          | <i>Bacteroides</i>                  | 0                              | 0     | 0      | 1      | YES                               |      |      |      |      |
| Bacteria | Proteobacteria   | Betaproteobacteria    | Neisseriales        | Neisseriaceae           | <i>Kingella</i>                     | 0                              | 0     | 0      | 1      | YES                               |      |      |      |      |
| Bacteria | Firmicutes       | Clostridia            | Clostridiales       | Veillonellaceae         | <i>Megasphaera</i>                  | 1                              | 0     | 0      | 0      | YES                               |      |      |      |      |
| Bacteria | Actinobacteria   | Actinobacteria        | Actinomycetales     | Pseudonocardiaceae      |                                     | 982                            | 58    | 1      | 9      | NO                                |      |      |      |      |
| Bacteria | Proteobacteria   | Alphaproteobacteria   | Rhodospirillales    | Rhodospirillaceae       |                                     | 184                            | 102   | 29     | 412    | NO                                |      |      |      |      |
| Bacteria | Actinobacteria   | Actinobacteria        | Actinomycetales     | Frankiaceae             |                                     | 0                              | 4     | 14     | 539    | NO                                |      |      |      |      |
| Bacteria | Proteobacteria   | Alphaproteobacteria   | Rhizobiales         | Hyphomicrobiaceae       | <i>Pedomicrobium</i>                | 45                             | 121   | 13     | 378    | NO                                |      |      |      |      |
| Bacteria | Acidobacteria    | Acidobacteria-6       | iii1-15             |                         |                                     | 214                            | 43    | 0      | 73     | NO                                |      |      |      |      |
| Bacteria | Proteobacteria   | Betaproteobacteria    | MND1                |                         |                                     | 188                            | 62    | 14     | 61     | NO                                |      |      |      |      |
| Bacteria | Gemmatimonadetes | Gemm-1                |                     |                         |                                     | 93                             | 26    | 9      | 99     | NO                                |      |      |      |      |
| Bacteria | Proteobacteria   | Alphaproteobacteria   | Rhizobiales         |                         |                                     | 63                             | 41    | 7      | 111    | NO                                |      |      |      |      |
| Bacteria | Nitrospirae      | Nitrospira            | Nitrospirales       | Nitrospiraceae          |                                     | 85                             | 94    | 20     | 22     | NO                                |      |      |      |      |
| Bacteria | Proteobacteria   | Alphaproteobacteria   | Rhodobacteriales    | Hyphomonadaceae         |                                     | 16                             | 25    | 6      | 172    | NO                                |      |      |      |      |
| Bacteria | Actinobacteria   | Thermoleophilina      | Solirubrobacterales |                         |                                     | 7                              | 5     | 12     | 187    | NO                                |      |      |      |      |
| Bacteria | Proteobacteria   | Alphaproteobacteria   | Rhizobiales         | Hyphomicrobiaceae       |                                     | 98                             | 8     | 2      | 101    | NO                                |      |      |      |      |

**Supplementary Table S6. Dental calculus weight, DNA yield and microbiome classification and distribution across the YNH4. Taxa sorted by presence/absence in the human oral microbiome and by average frequency across the four individuals.**

|          |                  |                      |                     |                        |                              | YNH.A                          | YNH.B | YNH.B2 | YNH.B3 |                                   |
|----------|------------------|----------------------|---------------------|------------------------|------------------------------|--------------------------------|-------|--------|--------|-----------------------------------|
|          |                  |                      |                     |                        |                              | Calculus Weight (mg)           |       |        |        |                                   |
|          |                  |                      |                     |                        |                              | 9.7                            | 10.6  | 10.2   | 9.0    |                                   |
|          |                  |                      |                     |                        |                              | DNA yield (ng DNA / mg sample) |       |        |        |                                   |
|          |                  |                      |                     |                        |                              | 13.7                           | 14.8  | 40.0   | 14.5   |                                   |
| Kingdom  | Phylum           | Class                | Order               | Family                 | Genus                        | DNA yield (ng DNA/mg sample)   |       |        |        | Present in human oral microbiome? |
| Bacteria | Chloroflexi      | S085                 |                     |                        |                              | 125                            | 13    | 0      | 66     | NO                                |
| Bacteria | Proteobacteria   | Betaproteobacteria   | Burkholderiales     | Comamonadaceae         |                              | 48                             | 8     | 116    | 30     | NO                                |
| Bacteria | Nitrospirae      | Nitrospira           | Nitrospirales       | 0319-6A21              |                              | 142                            | 38    | 7      | 7      | NO                                |
| Bacteria | Proteobacteria   | Alphaproteobacteria  | Rhizobiales         | Hyphomicrobiaceae      | <i>Rhodoplanes</i>           | 50                             | 22    | 6      | 115    | NO                                |
| Bacteria | Proteobacteria   | Betaproteobacteria   |                     |                        |                              | 134                            | 14    | 4      | 37     | NO                                |
| Bacteria | Firmicutes       | Clostridia           | Clostridiales       | [Tissierellaceae]      | <i>Sporanaerobacter</i>      | 83                             | 3     | 54     | 48     | NO                                |
| Bacteria | Synergistetes    | Synergistia          | Synergistales       | Synergistaceae         | <i>Candidatus Tammella</i>   | 24                             | 83    | 28     | 11     | NO                                |
| Bacteria | Proteobacteria   | Alphaproteobacteria  |                     |                        |                              | 54                             | 13    | 2      | 74     | NO                                |
| Bacteria | Proteobacteria   | Deltaproteobacteria  | Syntrophobacterales | Syntrophobacteraceae   |                              | 56                             | 21    | 3      | 50     | NO                                |
| Bacteria | Proteobacteria   | Gammaproteobacteria  | Xanthomonadales     | Sinobacteraceae        |                              | 33                             | 65    | 5      | 13     | NO                                |
| Bacteria | Chloroflexi      | Anaerolineae         | SBR1031             | A4b                    |                              | 41                             | 75    | 0      | 0      | NO                                |
| Bacteria | Actinobacteria   | Acidimicrobiia       | Acidimicrobiales    | AKIW874                |                              | 91                             | 15    | 0      | 1      | NO                                |
| Bacteria | Acidobacteria    | DA052                | Ellin6513           |                        |                              | 72                             | 19    | 7      | 6      | NO                                |
| Bacteria | Firmicutes       | Clostridia           | Clostridiales       | Veillonellaceae        | <i>Schwartzia</i>            | 13                             | 24    | 41     | 23     | NO                                |
| Bacteria | Acidobacteria    | Solibacteres         | Solibacterales      |                        |                              | 24                             | 22    | 2      | 44     | NO                                |
| Bacteria | Actinobacteria   | Actinobacteria       | Actinomycetales     |                        |                              | 7                              | 31    | 1      | 48     | NO                                |
| Bacteria | Proteobacteria   | Alphaproteobacteria  | Rhizobiales         | Xanthobacteraceae      |                              | 21                             | 24    | 2      | 39     | NO                                |
| Bacteria | Acidobacteria    | Acidobacteria-6      | iii1-15             | mb2424                 |                              | 32                             | 34    | 4      | 15     | NO                                |
| Bacteria | Proteobacteria   | Betaproteobacteria   | IS-44               |                        |                              | 45                             | 27    | 3      | 3      | NO                                |
| Bacteria | Chloroflexi      | Anaerolineae         | GCA004              |                        |                              | 0                              | 74    | 0      | 0      | NO                                |
| Bacteria | Proteobacteria   | Gammaproteobacteria  | Xanthomonadales     | Sinobacteraceae        | <i>Steroidobacter</i>        | 0                              | 58    | 3      | 5      | NO                                |
| Bacteria | Acidobacteria    | [Chloracidobacteria] | 11-24               |                        |                              | 55                             | 8     | 0      | 0      | NO                                |
| Bacteria | Proteobacteria   | Deltaproteobacteria  | Desulfovibrionales  | Desulfomicrobiaceae    | <i>Desulfomicrobium</i>      | 2                              | 0     | 55     | 1      | NO                                |
| Bacteria | Acidobacteria    | Acidobacteria-6      | CCU21               |                        |                              | 42                             | 4     | 1      | 10     | NO                                |
| Bacteria | Bacteroidetes    | Cytophagia           | Cytophagales        | Cytophagaceae          |                              | 40                             | 17    | 0      | 0      | NO                                |
| Bacteria | Proteobacteria   | Alphaproteobacteria  | Rhizobiales         | Bradyrhizobiaceae      | <i>Bradyrhizobium</i>        | 44                             | 7     | 0      | 5      | NO                                |
| Bacteria | Firmicutes       | Clostridia           | Clostridiales       | [Acidaminobacteraceae] |                              | 4                              | 18    | 27     | 6      | NO                                |
| Bacteria | Actinobacteria   | Acidimicrobiia       | Acidimicrobiales    | EB1017                 |                              | 23                             | 7     | 2      | 22     | NO                                |
| Bacteria | Bacteroidetes    | [Saprosirae]         | [Saprosirales]      | Chitinophagaceae       |                              | 8                              | 4     | 1      | 41     | NO                                |
| Bacteria | Nitrospirae      | Nitrospira           | Nitrospirales       | Nitrospiraceae         | <i>Nitrospira</i>            | 20                             | 12    | 0      | 22     | NO                                |
| Bacteria | Bacteroidetes    | Flavobacteriia       | Flavobacteriales    | [Weeksellaceae]        |                              | 4                              | 1     | 45     | 3      | NO                                |
| Bacteria | Actinobacteria   | Thermoleophilia      | Gaiellales          | Gaiellaceae            |                              | 27                             | 3     | 0      | 22     | NO                                |
| Bacteria | Acidobacteria    | [Chloracidobacteria] | RB41                | Ellin6075              |                              | 3                              | 33    | 1      | 11     | NO                                |
| Bacteria | Firmicutes       | Bacilli              | Lactobacillales     | Aerococcaceae          |                              | 26                             | 1     | 18     | 1      | NO                                |
| Bacteria | Bacteroidetes    | Bacteroidia          | Bacteroidales       |                        |                              | 3                              | 8     | 16     | 19     | NO                                |
| Bacteria | Actinobacteria   | Actinobacteria       | Actinomycetales     | Streptosporangiaceae   | <i>Nonomuraea</i>            | 0                              | 46    | 0      | 0      | NO                                |
| Bacteria | Elusimicrobia    | Endomicrobia         |                     |                        |                              | 12                             | 2     | 24     | 4      | NO                                |
| Bacteria | Actinobacteria   | Actinobacteria       | Actinomycetales     | Propionibacteriaceae   |                              | 6                              | 6     | 13     | 14     | NO                                |
| Bacteria | Proteobacteria   | Alphaproteobacteria  | Rhizobiales         | Hyphomicrobiaceae      | <i>Hyphomicrobium</i>        | 18                             | 4     | 3      | 14     | NO                                |
| Bacteria | GN02             | BD1-5                |                     |                        |                              | 12                             | 1     | 21     | 2      | NO                                |
| Bacteria | Actinobacteria   | Actinobacteria       | Actinomycetales     | Streptomycetaceae      | <i>Streptomyces</i>          | 8                              | 1     | 8      | 19     | NO                                |
| Bacteria | Firmicutes       | Clostridia           | Clostridiales       | Lachnospiraceae        | <i>Moryella</i>              | 1                              | 1     | 19     | 14     | NO                                |
| Bacteria | Chloroflexi      | Ellin6529            |                     |                        |                              | 24                             | 8     | 0      | 1      | NO                                |
| Bacteria | Firmicutes       | Clostridia           | Clostridiales       | Clostridiaceae         | <i>Clostridium</i>           | 13                             | 3     | 1      | 15     | NO                                |
| Bacteria | Firmicutes       | Clostridia           | Clostridiales       | Syntrophomonadaceae    | <i>Syntrophomonas</i>        | 0                              | 3     | 16     | 11     | NO                                |
| Bacteria | Proteobacteria   | Alphaproteobacteria  | Ellin329            |                        |                              | 5                              | 3     | 1      | 20     | NO                                |
| Bacteria | Acidobacteria    | Acidobacteriia       | Acidobacteriales    | Koribacteraceae        |                              | 6                              | 1     | 0      | 22     | NO                                |
| Bacteria | Proteobacteria   | Betaproteobacteria   | Ellin6067           |                        |                              | 1                              | 23    | 4      | 0      | NO                                |
| Bacteria | Acidobacteria    | Solibacteres         | Solibacterales      | PAUC26f                |                              | 12                             | 12    | 0      | 4      | NO                                |
| Bacteria | Actinobacteria   | Actinobacteria       | Actinomycetales     | Frankiaceae            | <i>Frankia</i>               | 0                              | 22    | 1      | 4      | NO                                |
| Bacteria | Actinobacteria   | Actinobacteria       | Actinomycetales     | Nocardiaceae           | <i>Rhodococcus</i>           | 2                              | 1     | 0      | 24     | NO                                |
| Bacteria | Acidobacteria    | Acidobacteria-5      |                     |                        |                              | 16                             | 7     | 0      | 4      | NO                                |
| Bacteria | Proteobacteria   | Alphaproteobacteria  | Rhizobiales         | Methylocystaceae       |                              | 1                              | 0     | 1      | 23     | NO                                |
| Bacteria | Acidobacteria    | Solibacteres         | Solibacterales      | Solibacteraceae        | <i>Candidatus Solibacter</i> | 3                              | 0     | 0      | 22     | NO                                |
| Bacteria | Acidobacteria    | Solibacteres         | Solibacterales      | AKIW659                |                              | 12                             | 5     | 6      | 0      | NO                                |
| Bacteria | Proteobacteria   | Gammaproteobacteria  | Pseudomonadales     | Pseudomonadaceae       | <i>Pseudomonas</i>           | 17                             | 2     | 3      | 0      | NO                                |
| Bacteria | Acidobacteria    | [Chloracidobacteria] | RB41                |                        |                              | 6                              | 5     | 0      | 11     | NO                                |
| Bacteria | Armatimonadetes  | [Fimbriimonadia]     | [Fimbriimonadales]  |                        |                              | 0                              | 15    | 0      | 7      | NO                                |
| Bacteria | Gemmatimonadetes | Gemmatimonadetes     | KD8-87              |                        |                              | 14                             | 6     | 0      | 2      | NO                                |
| Bacteria | Chloroflexi      | Anaerolineae         | envOPS12            |                        |                              | 11                             | 10    | 0      | 0      | NO                                |
| Bacteria | TM7              | TM7-3                | EW055               |                        |                              | 3                              | 4     | 13     | 0      | NO                                |
| Bacteria | Actinobacteria   | Acidimicrobiia       | Acidimicrobiales    |                        |                              | 12                             | 5     | 0      | 2      | NO                                |
| Bacteria | Gemmatimonadetes | Gemmatimonadetes     |                     |                        |                              | 19                             | 0     | 0      | 0      | NO                                |
| Bacteria | Proteobacteria   | Alphaproteobacteria  | Rhizobiales         | Bradyrhizobiaceae      |                              | 8                              | 6     | 0      | 4      | NO                                |
| Bacteria | Proteobacteria   | Deltaproteobacteria  | Myxococcales        |                        |                              | 8                              | 4     | 1      | 4      | NO                                |
| Bacteria | Actinobacteria   | Actinobacteria       | Actinomycetales     | Mycobacteriaceae       | <i>Mycobacterium</i>         | 1                              | 7     | 0      | 8      | NO                                |
| Bacteria | SR1              |                      |                     |                        |                              | 1                              | 1     | 12     | 1      | NO                                |
| Bacteria | TM6              | SJA-4                |                     |                        |                              | 1                              | 3     | 11     | 0      | NO                                |
| Bacteria | Actinobacteria   | Actinobacteria       | Actinomycetales     | Frankiaceae            | <i>Kaistibacter</i>          | 0                              | 0     | 0      | 15     | NO                                |
| Bacteria | Proteobacteria   |                      |                     |                        |                              | 11                             | 4     | 0      | 0      | NO                                |
| Bacteria | Armatimonadetes  | 0319-6E2             |                     |                        |                              | 2                              | 12    | 0      | 0      | NO                                |
| Bacteria | Firmicutes       | Clostridia           | Clostridiales       | [Acidaminobacteraceae] | <i>Fusibacter</i>            | 6                              | 0     | 6      | 1      | NO                                |
| Bacteria | Proteobacteria   | Alphaproteobacteria  | Sphingomonadales    | Sphingomonadaceae      | <i>Sphingomonas</i>          | 0                              | 11    | 1      | 1      | NO                                |
| Bacteria | Acidobacteria    | Sva0725              | Sva0725             |                        |                              | 12                             | 1     | 0      | 0      | NO                                |
| Bacteria | Proteobacteria   | Betaproteobacteria   | Rhodocyclales       | Rhodocyclaceae         | <i>Propionivibrio</i>        | 2                              | 1     | 9      | 0      | NO                                |
| Bacteria | Firmicutes       | Clostridia           | Clostridiales       | Ruminococcaceae        |                              | 1                              | 2     | 2      | 7      | NO                                |

**Supplementary Table S6. Dental calculus weight, DNA yield and microbiome classification and distribution across the YNH4. Taxa sorted by presence/absence in the human oral microbiome and by average frequency across the four individuals.**

|          |                  |                      |                       |                         |                                  | YNH.A                          | YNH.B | YNH.B2 | YNH.B3 |                                   |      |
|----------|------------------|----------------------|-----------------------|-------------------------|----------------------------------|--------------------------------|-------|--------|--------|-----------------------------------|------|
|          |                  |                      |                       |                         |                                  | Calculus Weight (mg)           |       | 9.7    | 10.6   | 10.2                              | 9.0  |
|          |                  |                      |                       |                         |                                  | DNA yield (ng DNA / mg sample) |       | 13.7   | 14.8   | 40.0                              | 14.5 |
| Kingdom  | Phylum           | Class                | Order                 | Family                  | Genus                            | DNA yield (ng DNA/mg sample)   |       |        |        | Present in human oral microbiome? |      |
| Bacteria | Armatimonadetes  | [Fimbriimonadial]    | [Fimbriimonadales]    | [Fimbriimonadaceae]     |                                  | 1                              | 9     | 1      | 1      | NO                                |      |
| Bacteria | Chloroflexi      | TK10                 | B07_WMSP1             |                         |                                  | 3                              | 2     | 1      | 6      | NO                                |      |
| Bacteria | Proteobacteria   | Alphaproteobacteria  | Rhizobiales           | Rhodobiaceae            | <i>Afifella</i>                  | 3                              | 3     | 0      | 6      | NO                                |      |
| Archaea  | Crenarchaeota    | Thaumarchaeota       | Cenarchaeales         | Cenarchaeaceae          |                                  | 7                              | 5     | 0      | 0      | NO                                |      |
| Bacteria | Synergistetes    | Synergistia          | Synergistales         | Dethiosulfovibrionaceae | <i>Pyramidobacter</i>            | 2                              | 2     | 2      | 5      | NO                                |      |
| Bacteria | Chloroflexi      | Anaerolineae         | H39                   |                         |                                  | 8                              | 3     | 0      | 0      | NO                                |      |
| Bacteria | Chloroflexi      | Anaerolineae         | S0208                 |                         |                                  | 11                             | 0     | 0      | 0      | NO                                |      |
| Bacteria | Chloroflexi      | Thermomicrobia       | JG30-KF-CM45          |                         |                                  | 1                              | 3     | 0      | 7      | NO                                |      |
| Bacteria | Proteobacteria   | Alphaproteobacteria  | Rhodospirillales      |                         |                                  | 0                              | 9     | 0      | 2      | NO                                |      |
| Bacteria | Firmicutes       | Clostridia           | Clostridiales         | Ruminococcaceae         | <i>Oscillospira</i>              | 1                              | 0     | 0      | 9      | NO                                |      |
| Bacteria | Chloroflexi      | Anaerolineae         | A31                   | S47                     |                                  | 6                              | 4     | 0      | 0      | NO                                |      |
| Bacteria | Chloroflexi      | TK17                 | mle1-48               |                         |                                  | 5                              | 0     | 0      | 5      | NO                                |      |
| Bacteria | Planctomycetes   | Planctomycetia       | Gemmatales            | Gemmataceae             |                                  | 4                              | 2     | 0      | 4      | NO                                |      |
| Bacteria | Firmicutes       | Clostridia           | Clostridiales         | Clostridiaceae          |                                  | 6                              | 1     | 2      | 0      | NO                                |      |
| Bacteria | Cyanobacteria    | 4C0d-2               | MLE1-12               |                         |                                  | 6                              | 2     | 1      | 0      | NO                                |      |
| Bacteria | Proteobacteria   | Alphaproteobacteria  | Rhizobiales           | Beijerinckiaceae        |                                  | 2                              | 0     | 1      | 6      | NO                                |      |
| Bacteria | Proteobacteria   | Alphaproteobacteria  | Rhodospirillales      | Rhodospirillaceae       | <i>Magnetospirillum</i>          | 2                              | 4     | 0      | 3      | NO                                |      |
| Bacteria | Actinobacteria   | MB-A2-108            | 0319-7L14             |                         |                                  | 7                              | 2     | 0      | 0      | NO                                |      |
| Bacteria | Firmicutes       | Bacilli              | Gemellales            | Gemellaceae             |                                  | 9                              | 0     | 0      | 0      | NO                                |      |
| Bacteria | Proteobacteria   | Deltaproteobacteria  | Myxococcales          | Haliangiaceae           |                                  | 3                              | 0     | 0      | 6      | NO                                |      |
| Bacteria | Proteobacteria   | Gammaproteobacteria  | Xanthomonadales       |                         |                                  | 9                              | 0     | 0      | 0      | NO                                |      |
| Bacteria | Firmicutes       | Clostridia           | Clostridiales         | [Mogibacteriaceae]      | <i>Anaerovorax</i>               | 1                              | 0     | 6      | 1      | NO                                |      |
| Bacteria | Gemmatimonadetes | Gemmatimonadetes     | Ellin5290             |                         |                                  | 4                              | 1     | 1      | 2      | NO                                |      |
| Bacteria | Acidobacteria    | Acidobacteria-6      | iii1-15               | RB40                    |                                  | 2                              | 1     | 0      | 5      | NO                                |      |
| Bacteria | Actinobacteria   | Actinobacteria       | Actinomycetales       | Micromonosporaceae      |                                  | 7                              | 1     | 0      | 0      | NO                                |      |
| Bacteria | Chloroflexi      | TK17                 |                       |                         |                                  | 3                              | 1     | 0      | 4      | NO                                |      |
| Bacteria | Actinobacteria   | Acidimicrobiia       | Acidimicrobiales      | C111                    |                                  | 0                              | 0     | 1      | 6      | NO                                |      |
| Bacteria | Firmicutes       | Clostridia           | Clostridiales         | Veillonellaceae         |                                  | 0                              | 2     | 1      | 4      | NO                                |      |
| Bacteria | Actinobacteria   | Actinobacteria       | Actinomycetales       | Propionibacteriaceae    | <i>Brooklawnia</i>               | 2                              | 0     | 0      | 5      | NO                                |      |
| Bacteria | Chloroflexi      | Gitt-GS-136          |                       |                         |                                  | 7                              | 0     | 0      | 0      | NO                                |      |
| Bacteria | Planctomycetes   | Phycisphaerae        | Phycisphaerales       |                         |                                  | 6                              | 1     | 0      | 0      | NO                                |      |
| Bacteria | Proteobacteria   | Betaproteobacteria   | SBl14                 |                         |                                  | 7                              | 0     | 0      | 0      | NO                                |      |
| Bacteria | WS2              | SHA-109              |                       |                         |                                  | 7                              | 0     | 0      | 0      | NO                                |      |
| Bacteria | Proteobacteria   | Alphaproteobacteria  | Rhodobacterales       | Rhodobacteraceae        |                                  | 0                              | 0     | 2      | 4      | NO                                |      |
| Bacteria | Proteobacteria   | Alphaproteobacteria  | Rhizobiales           | Phyllobacteriaceae      | <i>Mesorhizobium</i>             | 0                              | 3     | 1      | 2      | NO                                |      |
| Bacteria | Actinobacteria   | Actinobacteria       | Actinomycetales       | Nocardiaceae            | <i>Nocardia</i>                  | 1                              | 5     | 0      | 0      | NO                                |      |
| Bacteria | Actinobacteria   | Actinobacteria       | Actinomycetales       | Nocardiaceae            |                                  | 0                              | 0     | 0      | 6      | NO                                |      |
| Bacteria | Chloroflexi      | Anaerolineae         | Caldilineales         | Caldilineaceae          |                                  | 2                              | 4     | 0      | 0      | NO                                |      |
| Bacteria | Firmicutes       | Bacilli              | Bacillales            | Bacillaceae             |                                  | 6                              | 0     | 0      | 0      | NO                                |      |
| Bacteria | Proteobacteria   | Gammaproteobacteria  |                       |                         |                                  | 0                              | 0     | 0      | 6      | NO                                |      |
| Bacteria | Verrucomicrobia  | [Pedosphaerae]       | [Pedosphaerales]      |                         |                                  | 6                              | 0     | 0      | 0      | NO                                |      |
| Bacteria | Firmicutes       | Clostridia           | Clostridiales         | [Tissierellaceae]       | <i>ph2</i>                       | 1                              | 0     | 4      | 0      | NO                                |      |
| Bacteria | Synergistetes    | Synergistia          | Synergistales         | Synergistaceae          |                                  | 0                              | 0     | 4      | 1      | NO                                |      |
| Archaea  | Crenarchaeota    | Thaumarchaeota       | Nitrososphaerales     | Nitrososphaeraceae      | <i>Candidatus Nitrososphaera</i> | 4                              | 0     | 1      | 0      | NO                                |      |
| Bacteria | Acidobacteria    | Acidobacteriia       | Acidobacteriales      | Koribacteraceae         | <i>Candidatus Koribacter</i>     | 3                              | 2     | 0      | 0      | NO                                |      |
| Bacteria | Chloroflexi      | TK10                 | AKYG85                | Do1Order23              |                                  | 3                              | 1     | 0      | 1      | NO                                |      |
| Bacteria | GAL15            |                      |                       |                         |                                  | 2                              | 3     | 0      | 0      | NO                                |      |
| Bacteria | Proteobacteria   | Alphaproteobacteria  | Rhodospirillales      | Acetobacteraceae        |                                  | 2                              | 1     | 0      | 2      | NO                                |      |
| Bacteria | Proteobacteria   | Gammaproteobacteria  | Chromatiales          |                         |                                  | 5                              | 0     | 0      | 0      | NO                                |      |
| Bacteria | Proteobacteria   | Gammaproteobacteria  | Legionellales         | Coxiellaceae            |                                  | 2                              | 2     | 0      | 1      | NO                                |      |
| Bacteria | WS3              | PRR-12               | Sediment-1            | CV106                   |                                  | 5                              | 0     | 0      | 0      | NO                                |      |
| Bacteria | Acidobacteria    | [Chloracidobacteria] | PK29                  |                         |                                  | 3                              | 0     | 1      | 0      | NO                                |      |
| Bacteria | Acidobacteria    | BPC102               |                       |                         |                                  | 2                              | 1     | 1      | 0      | NO                                |      |
| Bacteria | Proteobacteria   | Deltaproteobacteria  | Bdellovibrionales     | Bdellovibrionaceae      | <i>Bdellovibrio</i>              | 0                              | 3     | 0      | 1      | NO                                |      |
| Bacteria | Actinobacteria   | KIST-JJY010          |                       |                         |                                  | 4                              | 0     | 0      | 0      | NO                                |      |
| Bacteria | Gemmatimonadetes | Gemmatimonadetes     | C114                  |                         |                                  | 4                              | 0     | 0      | 0      | NO                                |      |
| Bacteria | Proteobacteria   | Alphaproteobacteria  | Rhizobiales           | Phyllobacteriaceae      |                                  | 0                              | 2     | 0      | 2      | NO                                |      |
| Bacteria | Proteobacteria   | Alphaproteobacteria  | Rickettsiales         |                         |                                  | 1                              | 1     | 0      | 2      | NO                                |      |
| Bacteria | Proteobacteria   | Deltaproteobacteria  | MIZ46                 |                         |                                  | 3                              | 0     | 0      | 1      | NO                                |      |
| Bacteria | Proteobacteria   | Gammaproteobacteria  | Pseudomonadales       | Pseudomonadaceae        |                                  | 4                              | 0     | 0      | 0      | NO                                |      |
| Bacteria | SBR1093          | VHS-B5-50            |                       |                         |                                  | 3                              | 1     | 0      | 0      | NO                                |      |
| Bacteria | WPS-2            |                      |                       |                         |                                  | 0                              | 0     | 0      | 4      | NO                                |      |
| Bacteria | Bacteroidetes    | [Saprosirae]         | [Saprosirales]        | Chitinophagaceae        | <i>Chitinophaga</i>              | 0                              | 3     | 0      | 0      | NO                                |      |
| Bacteria | Firmicutes       | Clostridia           | Clostridiales         | Christensenellaceae     | <i>Christensenella</i>           | 0                              | 2     | 0      | 1      | NO                                |      |
| Bacteria | Verrucomicrobia  | [Spartobacteria]     | [Chthoniobacteriales] | [Chthoniobacteraceae]   | <i>DA101</i>                     | 0                              | 1     | 0      | 2      | NO                                |      |
| Bacteria | Proteobacteria   | Alphaproteobacteria  | Rhizobiales           | Hyphomicrobiaceae       | <i>Devosia</i>                   | 1                              | 2     | 0      | 0      | NO                                |      |
| Archaea  | Crenarchaeota    | Thaumarchaeota       | Cenarchaeales         | Cenarchaeaceae          | <i>Nitrosopumilus</i>            | 3                              | 0     | 0      | 0      | NO                                |      |
| Bacteria | Actinobacteria   | Actinobacteria       | Actinomycetales       | Micromonosporaceae      | <i>Pilimelia</i>                 | 0                              | 0     | 0      | 3      | NO                                |      |
| Bacteria | Acidobacteria    | EC1113               |                       |                         |                                  | 2                              | 1     | 0      | 0      | NO                                |      |
| Bacteria | Acidobacteria    | Solibacteres         | JH-WHS99              |                         |                                  | 0                              | 3     | 0      | 0      | NO                                |      |
| Bacteria | Actinobacteria   | Actinobacteria       | Actinomycetales       | Geodermatophilaceae     |                                  | 0                              | 2     | 0      | 1      | NO                                |      |
| Bacteria | Actinobacteria   | Actinobacteria       | Actinomycetales       | Nocardioideaceae        |                                  | 2                              | 1     | 0      | 0      | NO                                |      |
| Bacteria | Chlorobi         | SJA-28               |                       |                         |                                  | 3                              | 0     | 0      | 0      | NO                                |      |
| Bacteria | Cyanobacteria    | Chloroplast          | Streptophyta          |                         |                                  | 3                              | 0     | 0      | 0      | NO                                |      |
| Bacteria | Gemmatimonadetes | Gemmatimonadetes     | NI423WL               |                         |                                  | 0                              | 0     | 0      | 3      | NO                                |      |
| Bacteria | Planctomycetes   | Planctomycetia       | Gemmatales            | Isosphaeraceae          |                                  | 1                              | 1     | 0      | 1      | NO                                |      |

**Supplementary Table S6. Dental calculus weight, DNA yield and microbiome classification and distribution across the YNH4. Taxa sorted by presence/absence in the human oral microbiome and by average frequency across the four individuals.**

|          |                  |                       |                      |                       |                                     | YNH.A                          | YNH.B | YNH.B2 | YNH.B3 |                                   |      |      |      |  |  |  |  |  |
|----------|------------------|-----------------------|----------------------|-----------------------|-------------------------------------|--------------------------------|-------|--------|--------|-----------------------------------|------|------|------|--|--|--|--|--|
|          |                  |                       |                      |                       |                                     | Calculus Weight (mg)           |       |        |        | 9.7                               | 10.6 | 10.2 | 9.0  |  |  |  |  |  |
|          |                  |                       |                      |                       |                                     | DNA yield (ng DNA / mg sample) |       |        |        | 13.7                              | 14.8 | 40.0 | 14.5 |  |  |  |  |  |
| Kingdom  | Phylum           | Class                 | Order                | Family                | Genus                               | DNA yield (ng DNA/mg sample)   |       |        |        | Present in human oral microbiome? |      |      |      |  |  |  |  |  |
| Bacteria | Proteobacteria   | Alphaproteobacteria   | Kiloniellales        |                       |                                     | 1                              | 0     | 0      | 2      | NO                                |      |      |      |  |  |  |  |  |
| Bacteria | Proteobacteria   | Deltaproteobacteria   | Myxococcales         | Polyangiaceae         |                                     | 3                              | 0     | 0      | 0      | NO                                |      |      |      |  |  |  |  |  |
| Bacteria | Firmicutes       | Clostridia            | Clostridiales        | Lachnospiraceae       | <i>[Ruminococcus]</i>               | 0                              | 0     | 2      | 0      | NO                                |      |      |      |  |  |  |  |  |
| Bacteria | Chlorobi         | OPB56                 |                      |                       |                                     | 0                              | 0     | 2      | 0      | NO                                |      |      |      |  |  |  |  |  |
| Bacteria | Actinobacteria   | Thermoleophilia       | Solirubrobacterales  | Solirubrobacteraceae  |                                     | 1                              | 0     | 1      | 0      | NO                                |      |      |      |  |  |  |  |  |
| Bacteria | Proteobacteria   | Gammaproteobacteria   | Legionellales        | Coxiellaceae          | <i>Aquicella</i>                    | 1                              | 1     | 0      | 0      | NO                                |      |      |      |  |  |  |  |  |
| Bacteria | Actinobacteria   | Actinobacteria        | Actinomycetales      | Micrococaceae         | <i>Arthrobacter</i>                 | 2                              | 0     | 0      | 0      | NO                                |      |      |      |  |  |  |  |  |
| Bacteria | Actinobacteria   | Actinobacteria        | Actinomycetales      | Geodermatophilaceae   | <i>Blastococcus</i>                 | 0                              | 0     | 0      | 2      | NO                                |      |      |      |  |  |  |  |  |
| Bacteria | Firmicutes       | Clostridia            | Clostridiales        | Clostridiaceae        | <i>Caldanaerocella</i>              | 2                              | 0     | 0      | 0      | NO                                |      |      |      |  |  |  |  |  |
| Bacteria | Verrucomicrobia  | [Spartobacteria]      | [Chthoniobacterales] | [Chthoniobacteraceae] | <i>Candidatus Xiphinematobacter</i> | 0                              | 1     | 0      | 1      | NO                                |      |      |      |  |  |  |  |  |
| Bacteria | Firmicutes       | Clostridia            | Clostridiales        | Clostridiaceae        | <i>Clostridisalibacter</i>          | 2                              | 0     | 0      | 0      | NO                                |      |      |      |  |  |  |  |  |
| Bacteria | Proteobacteria   | Gammaproteobacteria   | Xanthomonadales      | Xanthomonadaceae      | <i>Dokdonella</i>                   | 0                              | 0     | 0      | 2      | NO                                |      |      |      |  |  |  |  |  |
| Bacteria | Armatimonadetes  | [Fimbriimonadia]      | [Fimbriimonadales]   | [Fimbriimonadaceae]   | <i>Fimbriimonas</i>                 | 0                              | 0     | 0      | 2      | NO                                |      |      |      |  |  |  |  |  |
| Bacteria | Actinobacteria   | Actinobacteria        | Actinomycetales      | Nocardoidaceae        | <i>Kribbella</i>                    | 1                              | 1     | 0      | 0      | NO                                |      |      |      |  |  |  |  |  |
| Bacteria | Proteobacteria   | Betaproteobacteria    | Burkholderiales      | Comamonadaceae        | <i>Methylibium</i>                  | 2                              | 0     | 0      | 0      | NO                                |      |      |      |  |  |  |  |  |
| Bacteria | Rhizobacteria    | Alphaproteobacteria   | Rhizobiales          | Phyllobacteriaceae    | <i>Thermovum</i>                    | 1                              | 0     | 0      | 1      | NO                                |      |      |      |  |  |  |  |  |
| Bacteria |                  |                       |                      |                       |                                     | 2                              | 0     | 0      | 0      | NO                                |      |      |      |  |  |  |  |  |
| Bacteria | Acidobacteria    | [Chloracidobacteria]  | Ellin7246            |                       |                                     | 0                              | 0     | 0      | 2      | NO                                |      |      |      |  |  |  |  |  |
| Bacteria | Acidobacteria    | PAUC37f               |                      |                       |                                     | 0                              | 2     | 0      | 0      | NO                                |      |      |      |  |  |  |  |  |
| Bacteria | Actinobacteria   | Actinobacteria        | Actinomycetales      | Actinomycetaceae      |                                     | 0                              | 1     | 0      | 1      | NO                                |      |      |      |  |  |  |  |  |
| Bacteria | Actinobacteria   | Actinobacteria        | Actinomycetales      | Streptomycetaceae     |                                     | 2                              | 0     | 0      | 0      | NO                                |      |      |      |  |  |  |  |  |
| Bacteria | Actinobacteria   | Actinobacteria        | Actinomycetales      | Streptosporangiaceae  |                                     | 0                              | 2     | 0      | 0      | NO                                |      |      |      |  |  |  |  |  |
| Bacteria | Actinobacteria   | Thermoleophilia       | Gaiellales           |                       |                                     | 0                              | 2     | 0      | 0      | NO                                |      |      |      |  |  |  |  |  |
| Bacteria | Actinobacteria   | Thermoleophilia       | Solirubrobacterales  | Conexibacteraceae     |                                     | 2                              | 0     | 0      | 0      | NO                                |      |      |      |  |  |  |  |  |
| Bacteria | BRC1             | PRR-11                |                      |                       |                                     | 0                              | 0     | 0      | 2      | NO                                |      |      |      |  |  |  |  |  |
| Bacteria | Chlorobi         |                       |                      |                       |                                     | 0                              | 2     | 0      | 0      | NO                                |      |      |      |  |  |  |  |  |
| Bacteria | Chloroflexi      | TK10                  | AKYG885              | 5B-12                 |                                     | 2                              | 0     | 0      | 0      | NO                                |      |      |      |  |  |  |  |  |
| Bacteria | Gemmatimonadetes | Gemm-2                |                      |                       |                                     | 2                              | 0     | 0      | 0      | NO                                |      |      |      |  |  |  |  |  |
| Bacteria | PAUC34f          |                       |                      |                       |                                     | 2                              | 0     | 0      | 0      | NO                                |      |      |      |  |  |  |  |  |
| Bacteria | Planctomycetes   | Phycisphaerae         | WD2101               |                       |                                     | 2                              | 0     | 0      | 0      | NO                                |      |      |      |  |  |  |  |  |
| Bacteria | Proteobacteria   | Alphaproteobacteria   | Sphingomonadales     | Sphingomonadaceae     |                                     | 0                              | 1     | 0      | 1      | NO                                |      |      |      |  |  |  |  |  |
| Bacteria | Proteobacteria   | Betaproteobacteria    | Burkholderiales      | Alcaligenaceae        |                                     | 1                              | 1     | 0      | 0      | NO                                |      |      |      |  |  |  |  |  |
| Bacteria | Proteobacteria   | Betaproteobacteria    | SC-1-84              |                       |                                     | 1                              | 0     | 0      | 1      | NO                                |      |      |      |  |  |  |  |  |
| Bacteria | Proteobacteria   | Gammaproteobacteria   | Legionellales        | Legionellaceae        |                                     | 0                              | 1     | 0      | 1      | NO                                |      |      |      |  |  |  |  |  |
| Bacteria | TM7              | MJK10                 |                      |                       |                                     | 2                              | 0     | 0      | 0      | NO                                |      |      |      |  |  |  |  |  |
| Bacteria | TM7              | TM7-1                 |                      |                       |                                     | 1                              | 1     | 0      | 0      | NO                                |      |      |      |  |  |  |  |  |
| Bacteria | WS3              | PRR-12                | Sediment-1           |                       |                                     | 2                              | 0     | 0      | 0      | NO                                |      |      |      |  |  |  |  |  |
| Bacteria | Bacteroidetes    | Flavobacteriia        | Flavobacteriales     | [Weeksellaceae]       | <i>Chryseobacterium</i>             | 0                              | 0     | 1      | 0      | NO                                |      |      |      |  |  |  |  |  |
| Bacteria | Firmicutes       | Clostridia            | Clostridiales        | Lachnospiraceae       | <i>Epulopiscium</i>                 | 0                              | 0     | 1      | 0      | NO                                |      |      |      |  |  |  |  |  |
| Bacteria | Proteobacteria   | Epsilonproteobacteria | Campylobacterales    | Helicobacteraceae     | <i>Flexispira</i>                   | 0                              | 0     | 1      | 0      | NO                                |      |      |      |  |  |  |  |  |
| Bacteria | Bacteroidetes    | [Rhodothermi]         | [Rhodothermales]     | [Balneolaceae]        | <i>KSAT</i>                         | 0                              | 0     | 1      | 0      | NO                                |      |      |      |  |  |  |  |  |
| Bacteria | Proteobacteria   | Betaproteobacteria    | Burkholderiales      | Comamonadaceae        | <i>Lampropedia</i>                  | 0                              | 0     | 1      | 0      | NO                                |      |      |      |  |  |  |  |  |
| Bacteria | Fusobacteria     | Fusobacteriia         | Fusobacteriales      | Fusobacteriaceae      | <i>Propionigenium</i>               | 0                              | 0     | 1      | 0      | NO                                |      |      |      |  |  |  |  |  |
| Bacteria | Firmicutes       | Clostridia            | Clostridiales        | [Tissierellaceae]     | <i>Tepidimicrobium</i>              | 0                              | 0     | 1      | 0      | NO                                |      |      |      |  |  |  |  |  |
| Bacteria | Bacteroidetes    | Bacteroidia           | Bacteroidales        | BS11                  |                                     | 0                              | 0     | 1      | 0      | NO                                |      |      |      |  |  |  |  |  |
| Bacteria | Chloroflexi      | Thermomicrobia        | AKYG1722             |                       |                                     | 0                              | 0     | 1      | 0      | NO                                |      |      |      |  |  |  |  |  |
| Bacteria | Firmicutes       | Bacilli               | Bacillales           |                       |                                     | 0                              | 0     | 1      | 0      | NO                                |      |      |      |  |  |  |  |  |
| Bacteria | Fusobacteria     | Fusobacteriia         | Fusobacteriales      |                       |                                     | 0                              | 0     | 1      | 0      | NO                                |      |      |      |  |  |  |  |  |
| Bacteria | Proteobacteria   | Deltaproteobacteria   | Desulfovibrionales   | Desulfomicrobiaceae   |                                     | 0                              | 0     | 1      | 0      | NO                                |      |      |      |  |  |  |  |  |
| Bacteria | Bacteroidetes    | Bacteroidia           | Bacteroidales        | [Paraprevotellaceae]  | <i>[Prevotella]</i>                 | 0                              | 0     | 0      | 1      | NO                                |      |      |      |  |  |  |  |  |
| Bacteria | Actinobacteria   | Actinobacteria        | Actinomycetales      | Thermomonosporaceae   | <i>Actinotomomurum</i>              | 0                              | 0     | 0      | 1      | NO                                |      |      |      |  |  |  |  |  |
| Bacteria | Firmicutes       | Clostridia            | Clostridiales        | Clostridiaceae        | <i>Alkaliphilus</i>                 | 0                              | 0     | 0      | 1      | NO                                |      |      |      |  |  |  |  |  |
| Bacteria | Proteobacteria   | Alphaproteobacteria   | Rhizobiales          | Phyllobacteriaceae    | <i>Aminobacter</i>                  | 1                              | 0     | 0      | 0      | NO                                |      |      |      |  |  |  |  |  |
| Bacteria | Actinobacteria   | Actinobacteria        | Actinomycetales      | Pseudonocardiaceae    | <i>Amycolatopsis</i>                | 1                              | 0     | 0      | 0      | NO                                |      |      |      |  |  |  |  |  |
| Bacteria | Proteobacteria   | Alphaproteobacteria   | Rhodospirillales     | Rhodospirillaceae     | <i>Azospirillum</i>                 | 0                              | 0     | 0      | 1      | NO                                |      |      |      |  |  |  |  |  |
| Bacteria | Firmicutes       | Bacilli               | Bacillales           | Paenibacillaceae      | <i>Brevibacillus</i>                | 0                              | 1     | 0      | 0      | NO                                |      |      |      |  |  |  |  |  |
| Bacteria | Proteobacteria   | Alphaproteobacteria   | Rhizobiales          | Rhizobiaceae          | <i>Candidatus Liberibacter</i>      | 1                              | 0     | 0      | 0      | NO                                |      |      |      |  |  |  |  |  |
| Bacteria | Actinobacteria   | Actinobacteria        | Actinomycetales      | Micromonosporaceae    | <i>Catellatospora</i>               | 1                              | 0     | 0      | 0      | NO                                |      |      |      |  |  |  |  |  |
| Bacteria | Firmicutes       | Clostridia            | Clostridiales        | Lachnospiraceae       | <i>Coprococcus</i>                  | 0                              | 0     | 0      | 1      | NO                                |      |      |      |  |  |  |  |  |
| Bacteria | Firmicutes       | Clostridia            | Clostridiales        | Peptococcaceae        | <i>Desulfotomaculum</i>             | 0                              | 1     | 0      | 0      | NO                                |      |      |      |  |  |  |  |  |
| Bacteria | Actinobacteria   | Actinobacteria        | Actinomycetales      | Dietziaceae           | <i>Dietzia</i>                      | 0                              | 0     | 0      | 1      | NO                                |      |      |      |  |  |  |  |  |
| Bacteria | Actinobacteria   | Actinobacteria        | Actinomycetales      | Geodermatophilaceae   | <i>Geodermatophilus</i>             | 0                              | 0     | 0      | 1      | NO                                |      |      |      |  |  |  |  |  |
| Bacteria | Proteobacteria   | Alphaproteobacteria   | Rickettsiales        | mitochondria          | <i>Grevillea</i>                    | 0                              | 0     | 0      | 1      | NO                                |      |      |      |  |  |  |  |  |
| Bacteria | Proteobacteria   | Alphaproteobacteria   | Rhodospirillales     | Rhodospirillaceae     | <i>Inquilinus</i>                   | 1                              | 0     | 0      | 0      | NO                                |      |      |      |  |  |  |  |  |
| Bacteria | Proteobacteria   | Alphaproteobacteria   | Sphingomonadales     | Sphingomonadaceae     | <i>Kaistobacter</i>                 | 0                              | 0     | 0      | 1      | NO                                |      |      |      |  |  |  |  |  |
| Bacteria | Actinobacteria   | Actinobacteria        | Actinomycetales      | Kineosporiaceae       | <i>Kineosporia</i>                  | 0                              | 0     | 0      | 1      | NO                                |      |      |      |  |  |  |  |  |
| Bacteria | Actinobacteria   | Actinobacteria        | Actinomycetales      | Streptomycetaceae     | <i>Kitasatospora</i>                | 0                              | 0     | 0      | 1      | NO                                |      |      |      |  |  |  |  |  |
| Bacteria | Proteobacteria   | Gammaproteobacteria   | Legionellales        | Legionellaceae        | <i>Legionella</i>                   | 0                              | 0     | 0      | 1      | NO                                |      |      |      |  |  |  |  |  |
| Bacteria | Proteobacteria   | Betaproteobacteria    | Burkholderiales      | Comamonadaceae        | <i>Limnohabitans</i>                | 1                              | 0     | 0      | 0      | NO                                |      |      |      |  |  |  |  |  |
| Bacteria | Proteobacteria   | Betaproteobacteria    | Burkholderiales      | Oxalobacteraceae      | <i>Massilia</i>                     | 0                              | 1     | 0      | 0      | NO                                |      |      |      |  |  |  |  |  |
| Bacteria | Proteobacteria   | Alphaproteobacteria   | Rhodospirillales     | Rhodospirillaceae     | <i>Novispirillum</i>                | 1                              | 0     | 0      | 0      | NO                                |      |      |      |  |  |  |  |  |
| Bacteria | Proteobacteria   | Alphaproteobacteria   | Rhizobiales          | Brucellaceae          | <i>Ochrobactrum</i>                 | 0                              | 0     | 0      | 1      | NO                                |      |      |      |  |  |  |  |  |
| Bacteria | Verrucomicrobia  | Opitutae              | Opitutales           | Opitutaceae           | <i>Opitutus</i>                     | 0                              | 0     | 0      | 1      | NO                                |      |      |      |  |  |  |  |  |
| Bacteria | Proteobacteria   | Alphaproteobacteria   | Rhizobiales          | Hyphomicrobiaceae     | <i>Parvibaculum</i>                 | 0                              | 0     | 0      | 1      | NO                                |      |      |      |  |  |  |  |  |
| Bacteria | Planctomycetes   | Planctomycetia        | Planctomycetales     | Planctomycetaceae     | <i>Planctomyces</i>                 | 0                              | 1     | 0      | 0      | NO                                |      |      |      |  |  |  |  |  |
| Bacteria | Actinobacteria   | Actinobacteria        | Actinomycetales      | Pseudonocardiaceae    | <i>Pseudonocardia</i>               | 0                              | 0     | 0      | 1      | NO                                |      |      |      |  |  |  |  |  |

**Supplementary Table S6. Dental calculus weight, DNA yield and microbiome classification and distribution across the YNH4. Taxa sorted by presence/absence in the human oral microbiome and by average frequency across the four individuals.**

|          |                 |                     |                      |                      |                          | YNH.A                          | YNH.B | YNH.B2 | YNH.B3 |                                   |      |      |      |
|----------|-----------------|---------------------|----------------------|----------------------|--------------------------|--------------------------------|-------|--------|--------|-----------------------------------|------|------|------|
|          |                 |                     |                      |                      |                          | Calculus Weight (mg)           |       |        |        | 9.7                               | 10.6 | 10.2 | 9.0  |
|          |                 |                     |                      |                      |                          | DNA yield (ng DNA / mg sample) |       |        |        | 13.7                              | 14.8 | 40.0 | 14.5 |
| Kingdom  | Phylum          | Class               | Order                | Family               | Genus                    | DNA yield (ng DNA/mg sample)   |       |        |        | Present in human oral microbiome? |      |      |      |
| Bacteria | Proteobacteria  | Alphaproteobacteria | Rhodospirillales     | Rhodospirillaceae    | <i>Rhodovibrio</i>       | 1                              | 0     | 0      | 0      | NO                                |      |      |      |
| Bacteria | Firmicutes      | Clostridia          | Clostridiales        | Lachnospiraceae      | <i>Roseburia</i>         | 1                              | 0     | 0      | 0      | NO                                |      |      |      |
| Bacteria | Actinobacteria  | Actinobacteria      | Actinomycetales      | Microbacteriaceae    | <i>Salinibacterium</i>   | 0                              | 0     | 0      | 1      | NO                                |      |      |      |
| Bacteria | Actinobacteria  | Actinobacteria      | Actinomycetales      | Intrasporangiaceae   | <i>Serinicoccus</i>      | 0                              | 1     | 0      | 0      | NO                                |      |      |      |
| Bacteria | Firmicutes      | Erysipelotrichi     | Erysipelotrichales   | Erysipelotrichaceae  | <i>Sharpea</i>           | 0                              | 0     | 0      | 1      | NO                                |      |      |      |
| Bacteria | Proteobacteria  | Deltaproteobacteria | Myxococcales         | Polyangiaceae        | <i>Sorangium</i>         | 1                              | 0     | 0      | 0      | NO                                |      |      |      |
| Bacteria | Firmicutes      | Bacilli             | Bacillales           | Planococcaceae       | <i>Sporosarcina</i>      | 0                              | 0     | 0      | 1      | NO                                |      |      |      |
| Bacteria | Actinobacteria  | Actinobacteria      | Actinomycetales      | Streptosporangiaceae | <i>Streptosporangium</i> | 0                              | 1     | 0      | 0      | NO                                |      |      |      |
| Bacteria | Firmicutes      | Clostridia          | Clostridiales        | Veillonellaceae      | <i>Succiniclasticum</i>  | 0                              | 1     | 0      | 0      | NO                                |      |      |      |
| Bacteria | Actinobacteria  | Actinobacteria      | Actinomycetales      | Propionibacteriaceae | <i>Tessaracoccus</i>     | 0                              | 0     | 0      | 1      | NO                                |      |      |      |
| Bacteria | Acidobacteria   | Acidobacteria-6     | BPC015               |                      |                          | 1                              | 0     | 0      | 0      | NO                                |      |      |      |
| Bacteria | Acidobacteria   | S035                |                      |                      |                          | 0                              | 0     | 0      | 1      | NO                                |      |      |      |
| Bacteria | Acidobacteria   | TM1                 |                      |                      |                          | 1                              | 0     | 0      | 0      | NO                                |      |      |      |
| Bacteria | Actinobacteria  | Actinobacteria      | Actinomycetales      | Actinosynnemataceae  |                          | 1                              | 0     | 0      | 0      | NO                                |      |      |      |
| Bacteria | Actinobacteria  | Thermoleophilia     | Solirubrobacteriales | Patulibacteraceae    |                          | 0                              | 1     | 0      | 0      | NO                                |      |      |      |
| Bacteria | Bacteroidetes   | Sphingobacteriia    | Sphingobacteriales   |                      |                          | 0                              | 1     | 0      | 0      | NO                                |      |      |      |
| Bacteria | Chlorobi        | BSV26               | C20                  |                      |                          | 0                              | 1     | 0      | 0      | NO                                |      |      |      |
| Bacteria | Chlorobi        | BSV26               | PK329                |                      |                          | 0                              | 0     | 0      | 1      | NO                                |      |      |      |
| Bacteria | Chloroflexi     |                     |                      |                      |                          | 0                              | 0     | 0      | 1      | NO                                |      |      |      |
| Bacteria | Chloroflexi     | Anaerolineae        | CFB-26               |                      |                          | 1                              | 0     | 0      | 0      | NO                                |      |      |      |
| Bacteria | Chloroflexi     | Chloroflexi         | [Roseiflexales]      |                      |                          | 0                              | 1     | 0      | 0      | NO                                |      |      |      |
| Bacteria | Chloroflexi     | TK10                |                      |                      |                          | 1                              | 0     | 0      | 0      | NO                                |      |      |      |
| Bacteria | Cyanobacteria   | 4C0d-2              | SM1D11               |                      |                          | 0                              | 0     | 0      | 1      | NO                                |      |      |      |
| Bacteria | Firmicutes      | Clostridia          | Natranaerobiales     | Anaerobranchaceae    |                          | 0                              | 0     | 0      | 1      | NO                                |      |      |      |
| Bacteria | GN02            | GKS2-174            |                      |                      |                          | 1                              | 0     | 0      | 0      | NO                                |      |      |      |
| Bacteria | Nitrospirae     | Nitrospira          | Nitrospirales        | [Leptospirillaceae]  |                          | 0                              | 0     | 0      | 1      | NO                                |      |      |      |
| Bacteria | NKB19           |                     |                      |                      |                          | 1                              | 0     | 0      | 0      | NO                                |      |      |      |
| Bacteria | Planctomycetes  | Planctomycetia      | Pirellulales         | Pirellulaceae        |                          | 1                              | 0     | 0      | 0      | NO                                |      |      |      |
| Bacteria | Proteobacteria  | Alphaproteobacteria | Rhizobiales          | Rhizobiaceae         |                          | 0                              | 0     | 0      | 1      | NO                                |      |      |      |
| Bacteria | Proteobacteria  | Alphaproteobacteria | Sphingomonadales     | Erythrobacteraceae   |                          | 0                              | 0     | 0      | 1      | NO                                |      |      |      |
| Bacteria | Proteobacteria  | Betaproteobacteria  | Rhodocyclales        | Rhodocyclaceae       |                          | 1                              | 0     | 0      | 0      | NO                                |      |      |      |
| Bacteria | Proteobacteria  | Deltaproteobacteria | [Entotheonellales]   | [Entotheonellaceae]  |                          | 1                              | 0     | 0      | 0      | NO                                |      |      |      |
| Bacteria | Proteobacteria  | Deltaproteobacteria | FAC87                |                      |                          | 0                              | 0     | 0      | 1      | NO                                |      |      |      |
| Bacteria | Proteobacteria  | Gammaproteobacteria | Enterobacteriales    | Enterobacteriaceae   |                          | 1                              | 0     | 0      | 0      | NO                                |      |      |      |
| Bacteria | Spirochaetes    | GN05                | SBYZ_6080            |                      |                          | 0                              | 1     | 0      | 0      | NO                                |      |      |      |
| Bacteria | Verrucomicrobia | [Methylococcoides]  | S-BQ2-57             |                      |                          | 1                              | 0     | 0      | 0      | NO                                |      |      |      |
| Bacteria | Verrucomicrobia | [Pedosphaerae]      | [Pedosphaerales]     | auto67_4W            |                          | 1                              | 0     | 0      | 0      | NO                                |      |      |      |
| Bacteria | Verrucomicrobia | Opitutae            | Opitutales           | Opitutaceae          |                          | 0                              | 1     | 0      | 0      | NO                                |      |      |      |
| Bacteria | WS3             | PRR-12              | Sediment-1           | PRR-10               |                          | 1                              | 0     | 0      | 0      | NO                                |      |      |      |
