# Supplementary material for: "The dead shall be raised": Multidisciplinary analysis of human skeletons reveals complexity in 19th century immigrant socioeconomic history and identity in New Haven, Connecticut
Source: PLoS One. 2019 Sep 9;14(9):e0219279. doi: 10.1371/journal.pone.0219279 (PMC6733446; doi:10.1371/journal.pone.0219279)
Supplement: S3 Table — (PDF) [file pone.0219279.s003.pdf]

**Supplementary Table S3. Nonmetric data scoring following Buikstra and Ubelaker [70] and Hauser and De Stefano [72]. L= left, R=right. X = feature too damaged to measure or missing.**

|                              | A |   |   |   | B  |   |    |   | B2                         |  |  |  | B3 |  |   |   | A |   |   |   | B |   |   |   | B2 |  |   |  | B3 |  |  |  |
|------------------------------|---|---|---|---|----|---|----|---|----------------------------|--|--|--|----|--|---|---|---|---|---|---|---|---|---|---|----|--|---|--|----|--|--|--|
|                              |   |   |   |   |    |   |    |   |                            |  |  |  |    |  |   |   | L |   |   |   | R |   |   |   | L  |  |   |  | R  |  |  |  |
|                              |   |   |   |   |    |   |    |   |                            |  |  |  |    |  |   |   |   |   |   |   |   |   |   |   |    |  |   |  |    |  |  |  |
| Anterior Nasal Spine         | X |   | X |   | X  |   | X  |   | 3                          |  |  |  |    |  |   |   |   | 0 | 0 | X | X | 0 | 0 | 0 | 0  |  |   |  |    |  |  |  |
| Inferior Nasal Aperture      | 3 |   | X |   | 3  |   | 4  |   |                            |  |  |  |    |  |   |   |   | 0 |   | X |   | 0 |   | 0 |    |  |   |  |    |  |  |  |
| Interorbital Breadth         | 2 |   | 2 |   | 1  |   | 1  |   |                            |  |  |  |    |  |   |   |   | 0 |   | X |   | 0 |   | 0 |    |  |   |  |    |  |  |  |
| Malar Tubercle               | 1 |   | 0 |   | 1  |   | 0  |   |                            |  |  |  |    |  |   |   |   | 0 | 0 | X | X | 1 | X | 0 | 0  |  |   |  |    |  |  |  |
| Nasal Aperture Shape         | X |   | X |   | 1  |   | 1  |   |                            |  |  |  |    |  |   |   |   | 0 |   | 1 |   | 0 |   | X |    |  |   |  |    |  |  |  |
| Nasal Aperture Width         | X |   | X |   | 1  |   | 1  |   |                            |  |  |  |    |  |   |   |   | 0 |   | 0 |   | 0 |   | X |    |  |   |  |    |  |  |  |
| Nasal Bone Contour           | 1 |   | 4 |   | 3  |   | 4  |   |                            |  |  |  |    |  |   |   |   | 0 | 0 | 0 | 0 | 1 | 0 | X | X  |  |   |  |    |  |  |  |
| Nasal Bone Shape             | 2 |   | 3 |   | 2  |   | 2  |   |                            |  |  |  |    |  |   |   |   | 1 | 0 | 1 | X | 0 | 1 | 0 | 0  |  |   |  |    |  |  |  |
| Nasal Overgrowth             | X |   | X |   | X  |   |    |   |                            |  |  |  |    |  |   |   |   | 0 | 0 | 0 | X | 0 | 0 | 0 | 0  |  |   |  |    |  |  |  |
| Nasofrontal Suture           | 1 |   | 1 |   | 2  |   | 2  |   |                            |  |  |  |    |  |   |   |   | 0 | 0 | 0 | X | 0 | 0 | 0 | 0  |  |   |  |    |  |  |  |
| Orbital Shape                | 2 |   | X |   | 2  |   | 1  |   |                            |  |  |  |    |  |   |   |   | 0 | 0 | 0 | 0 | 0 | 0 | 0 | 0  |  |   |  |    |  |  |  |
| Post-Bregmatic Depression    | 0 |   | X |   | 0  |   | 0  |   |                            |  |  |  |    |  |   |   |   | 0 | 0 | 1 | 2 | 1 | 2 | 2 | 3  |  |   |  |    |  |  |  |
| Posterior Zygomatic Tubercle | 1 |   | 0 |   | 0  |   | 0  |   |                            |  |  |  |    |  |   |   |   | 0 | 0 | 1 | 1 | 1 | 1 | 1 | 4  |  |   |  |    |  |  |  |
| Supranasal suture            | 2 |   | 0 |   | 0  |   | 2  |   |                            |  |  |  |    |  |   |   |   | 1 | 2 | X | X | X | X | 1 | 2  |  |   |  |    |  |  |  |
| Zygomatiocomaxillary Suture  | 0 |   | X |   | 0  |   | X  |   |                            |  |  |  |    |  |   |   |   | 0 | 0 | 0 | X | 0 | 0 | 0 | 0  |  |   |  |    |  |  |  |
| Transverse Palatine Suture   | X |   | 1 |   | X  |   | X  |   |                            |  |  |  |    |  |   |   |   | 0 | 0 | 1 | 0 | 0 | 0 | 0 | 0  |  |   |  |    |  |  |  |
|                              | A |   | B |   | B2 |   | B3 |   | Foramen spinosum           |  |  |  | 0  |  | 0 |   | 0 |   | 0 |   | 0 |   | 0 |   | 0  |  | 0 |  | 0  |  |  |  |
|                              | L | R | L | R | L  | R | L  | R | Foramen ovale              |  |  |  | 0  |  | 0 |   | 0 |   | 0 |   | 0 |   | 0 |   | 0  |  | 0 |  | 0  |  |  |  |
| Infraorbital suture          | X | X | 0 | 0 | 2  | 0 | X  | X | Pterygospinous bridge      |  |  |  | 0  |  | X | 3 | 3 | 3 | 3 | 1 | 1 |   |   |   |    |  |   |  |    |  |  |  |
| Infraorbital foramen         | X | X | X | X | 3  | 3 | X  | 0 | Pterygoalar bridge         |  |  |  | 0  |  | X | X | X | 3 | 3 | X | X |   |   |   |    |  |   |  |    |  |  |  |
| Zygomatofacial foramen       | X | 0 | X | X | 3  | 3 | 1  | 1 | Palatine torus development |  |  |  | 0  |  | 2 |   | 0 |   | X |   |   |   |   |   |    |  |   |  |    |  |  |  |
| Metopic Suture               | 1 |   | X |   | 0  |   | 1  |   | Palatine torus location    |  |  |  | 0  |  | 3 |   | 0 |   | X |   |   |   |   |   |    |  |   |  |    |  |  |  |
| Supraorbital notch           | 1 | 1 | X | X | 1  | 0 | 1  | 1 | Mylohyoid bridge developme |  |  |  | 0  |  | 0 | 0 | 0 | 0 | 0 | 1 | 0 |   |   |   |    |  |   |  |    |  |  |  |
| Supraorbital formaen         | 0 | 0 | X | 0 | 1  | 0 | 0  | 1 | Mylohyoid bridge location  |  |  |  | 0  |  | 0 | 0 | 0 | 0 | 0 | 2 | 0 |   |   |   |    |  |   |  |    |  |  |  |
| Supratrochlear notch         | X | 0 | X | X | 0  | 0 | 0  | 1 | Mental foramen count       |  |  |  | 1  |  | 1 | 1 | 1 | 0 | 0 | 1 | 1 |   |   |   |    |  |   |  |    |  |  |  |
| Coronal ossicle              | 0 | 0 | X | X | 0  | 0 | 0  | 0 | Mandibular torus           |  |  |  | 0  |  | 0 | 0 | 0 | 0 | 0 | 0 | 0 |   |   |   |    |  |   |  |    |  |  |  |
